# Supplementary material for: A Pulmonary Vascular Model From Endothelialized Whole Organ Scaffolds
Source: Front Bioeng Biotechnol. 2021 Nov 19;9:760309. doi: 10.3389/fbioe.2021.760309 (PMC8640093; doi:10.3389/fbioe.2021.760309)
Supplement: Supplementary file 2 [file Table3.XLSX]

## Sheet: mark.P7_EC
	p_val	avg_logFC	pct.1	pct.2	p_val_adj	cluster	gene
Nostrin	4.38705e-71	0.976778	0.919	0.557	7.95329e-67	General Capillary	Nostrin
Wif1	3.50438e-45	0.790274	0.87	0.54	6.35309e-41	General Capillary	Wif1
Scn3b	1.24057e-44	0.736031	0.921	0.65	2.24902e-40	General Capillary	Scn3b
Aplnr	6.18786e-42	0.761818	0.829	0.481	1.1218e-37	General Capillary	Aplnr
Kit	1.23941e-40	0.83702	0.733	0.391	2.24692e-36	General Capillary	Kit
Scn7a	9.65308e-35	0.863528	0.729	0.417	1.75001e-30	General Capillary	Scn7a
Emcn	4.8557e-32	0.521046	0.928	0.722	8.8029e-28	General Capillary	Emcn
Plvap	2.75614e-31	0.549017	0.94	0.761	4.99661e-27	General Capillary	Plvap
Col4a1	7.74534e-31	0.521417	0.965	0.811	1.40415e-26	General Capillary	Col4a1
AC141102.1	7.84775e-30	0.574137	0.849	0.659	1.42272e-25	General Capillary	AC141102.1
Epas1	1.89481e-29	0.41949	0.967	0.916	3.4351e-25	General Capillary	Epas1
Ntrk2	3.53921e-29	0.973701	0.444	0.158	6.41624e-25	General Capillary	Ntrk2
Akr1c14	1.07017e-28	0.605963	0.849	0.655	1.94012e-24	General Capillary	Akr1c14
Rgcc	3.52345e-25	0.793984	0.483	0.215	6.38766e-21	General Capillary	Rgcc
Calcrl	2.6225e-24	0.481396	0.94	0.869	4.75433e-20	General Capillary	Calcrl
RT1-CE4	1.48016e-21	0.416316	0.913	0.774	2.68338e-17	General Capillary	RT1-CE4
Lpar6	6.39635e-21	0.697318	0.638	0.483	1.15959e-16	General Capillary	Lpar6
Ctla2a	3.38847e-20	0.529131	0.719	0.58	6.14295e-16	General Capillary	Ctla2a
Clec14a	1.50137e-19	0.423461	0.888	0.715	2.72183e-15	General Capillary	Clec14a
Cyyr1	2.31828e-18	0.357468	0.895	0.785	4.20281e-14	General Capillary	Cyyr1
Sema3c	1.2284e-17	0.577772	0.7	0.517	2.22696e-13	General Capillary	Sema3c
Cd93	2.82098e-16	0.406517	0.899	0.794	5.11416e-12	General Capillary	Cd93
Cd48	2.91026e-16	0.281709	0.955	0.932	5.276e-12	General Capillary	Cd48
Lpl	7.70982e-16	0.575662	0.636	0.452	1.39771e-11	General Capillary	Lpl
Slfn5	1.54076e-15	0.428348	0.839	0.698	2.79325e-11	General Capillary	Slfn5
Cdh5	1.73355e-15	0.322775	0.952	0.912	3.14275e-11	General Capillary	Cdh5
Col15a1	3.79201e-15	0.538607	0.543	0.323	6.87453e-11	General Capillary	Col15a1
Adgrf5	4.19289e-15	0.328435	0.93	0.833	7.60129e-11	General Capillary	Adgrf5
Clec1a	1.13662e-14	0.399936	0.769	0.605	2.06057e-10	General Capillary	Clec1a
Tmem100	2.53851e-14	0.380597	0.903	0.788	4.60207e-10	General Capillary	Tmem100
Acer2	4.92842e-14	0.559749	0.618	0.474	8.93473e-10	General Capillary	Acer2
Prom1	9.0221e-14	0.45301	0.618	0.492	1.63562e-09	General Capillary	Prom1
Nrgn	9.09452e-14	0.506461	0.56	0.393	1.64875e-09	General Capillary	Nrgn
Ccnd1	2.27745e-13	0.41217	0.696	0.553	4.12879e-09	General Capillary	Ccnd1
Slc29a1	2.30231e-13	0.336287	0.829	0.68	4.17386e-09	General Capillary	Slc29a1
Rasgrp3	2.7865e-13	0.428162	0.688	0.553	5.05164e-09	General Capillary	Rasgrp3
Sgk1	7.75036e-13	0.545691	0.692	0.623	1.40506e-08	General Capillary	Sgk1
RT1-T24-4	7.84129e-12	0.305761	0.876	0.804	1.42155e-07	General Capillary	RT1-T24-4
Glp1r	1.88385e-11	0.499702	0.349	0.192	3.41522e-07	General Capillary	Glp1r
Dlc1	2.90199e-11	0.430657	0.746	0.671	5.26101e-07	General Capillary	Dlc1
Sft2d1	3.40195e-11	0.434546	0.618	0.524	6.1674e-07	General Capillary	Sft2d1
LOC684871	6.67824e-11	0.480261	0.579	0.449	1.2107e-06	General Capillary	LOC684871
Slco2a1	9.5857e-11	0.308132	0.791	0.646	1.73779e-06	General Capillary	Slco2a1
Gpr182	1.18504e-10	0.494592	0.44	0.314	2.14836e-06	General Capillary	Gpr182
Olfml2a	3.08054e-10	0.42678	0.647	0.553	5.58472e-06	General Capillary	Olfml2a
Gpihbp1	3.25698e-10	0.444103	0.341	0.197	5.90457e-06	General Capillary	Gpihbp1
Pcdh17	1.22867e-09	0.381391	0.657	0.508	2.22745e-05	General Capillary	Pcdh17
Ets1	1.60133e-09	0.301401	0.808	0.74	2.90305e-05	General Capillary	Ets1
Srgn	1.70948e-09	0.274299	0.843	0.718	3.09912e-05	General Capillary	Srgn
Clic5	2.54943e-08	0.360394	0.519	0.399	0.000462186	General Capillary	Clic5
Lxn	2.59216e-08	0.407024	0.5	0.404	0.000469933	General Capillary	Lxn
Lyve1	3.9975e-08	0.283977	0.845	0.741	0.000724707	General Capillary	Lyve1
Mfap2	5.02971e-08	0.309852	0.682	0.592	0.000911835	General Capillary	Mfap2
Mettl7a	6.67961e-08	0.373985	0.69	0.618	0.00121095	General Capillary	Mettl7a
Col4a2	7.49439e-08	0.375458	0.492	0.372	0.00135866	General Capillary	Col4a2
Nckap5	1.44713e-07	0.432357	0.318	0.203	0.00262351	General Capillary	Nckap5
Gmfg	1.67789e-07	0.307134	0.688	0.594	0.00304185	General Capillary	Gmfg
Carhsp1	2.3712e-07	0.251991	0.758	0.702	0.00429874	General Capillary	Carhsp1
Spns2	3.38327e-07	0.406899	0.434	0.338	0.00613353	General Capillary	Spns2
Tpm1	4.24387e-07	0.278911	0.659	0.625	0.0076937	General Capillary	Tpm1
Selenom	7.08777e-07	0.309633	0.636	0.61	0.0128494	General Capillary	Selenom
Cd109	7.3649e-07	0.359443	0.304	0.196	0.0133518	General Capillary	Cd109
Itga2	8.05233e-07	0.340864	0.221	0.12	0.0145981	General Capillary	Itga2
Mcam	1.16598e-06	0.339444	0.655	0.609	0.0211381	General Capillary	Mcam
Plekha2	1.53856e-06	0.349703	0.56	0.49	0.0278926	General Capillary	Plekha2
RT1-T24-3	2.89145e-06	0.360253	0.483	0.406	0.0524191	General Capillary	RT1-T24-3
AABR07054490.1	6.61067e-06	0.306541	0.217	0.126	0.119845	General Capillary	AABR07054490.1
Fads1	8.29404e-06	0.33908	0.283	0.187	0.150363	General Capillary	Fads1
Fxyd6	8.64381e-06	0.368196	0.461	0.395	0.156704	General Capillary	Fxyd6
Dusp6	1.30773e-05	0.451583	0.517	0.476	0.237078	General Capillary	Dusp6
Abcb1a	1.38635e-05	0.375672	0.213	0.124	0.25133	General Capillary	Abcb1a
Ldb2	1.4279e-05	0.260152	0.692	0.661	0.258864	General Capillary	Ldb2
Arhgef15	1.56752e-05	0.338278	0.461	0.397	0.284177	General Capillary	Arhgef15
Tppp3	3.37878e-05	0.255161	0.517	0.44	0.612538	General Capillary	Tppp3
Zfp503	9.25507e-05	0.37227	0.424	0.372	1	General Capillary	Zfp503
Prex2	0.000214993	0.318505	0.376	0.318	1	General Capillary	Prex2
Adk	0.0002164	0.339654	0.349	0.289	1	General Capillary	Adk
Col5a2	0.000266835	0.263879	0.612	0.603	1	General Capillary	Col5a2
Ucp2	0.000294273	0.261507	0.498	0.469	1	General Capillary	Ucp2
Arap2	0.000308573	0.302955	0.207	0.136	1	General Capillary	Arap2
Pxdc1	0.000375708	0.256827	0.531	0.47	1	General Capillary	Pxdc1
Rdx	0.000388517	0.300247	0.541	0.522	1	General Capillary	Rdx
Tlnrd1	0.000410508	0.278293	0.539	0.504	1	General Capillary	Tlnrd1
Add3	0.000499871	0.300058	0.421	0.37	1	General Capillary	Add3
Etl4	0.000575895	0.348158	0.388	0.355	1	General Capillary	Etl4
Ugcg	0.000760809	0.352271	0.335	0.291	1	General Capillary	Ugcg
Amigo2	0.0009649	0.324775	0.298	0.235	1	General Capillary	Amigo2
Eogt	0.00116056	0.308053	0.333	0.282	1	General Capillary	Eogt
Spry4	0.00119363	0.350883	0.225	0.171	1	General Capillary	Spry4
Sox7	0.00170574	0.343672	0.44	0.411	1	General Capillary	Sox7
Ptprd	0.00230227	0.282683	0.285	0.23	1	General Capillary	Ptprd
Mid1ip1	0.00231423	0.310269	0.492	0.478	1	General Capillary	Mid1ip1
Grap	0.00279582	0.253099	0.413	0.388	1	General Capillary	Grap
Gpx2	0.00326532	0.349402	0.186	0.129	1	General Capillary	Gpx2
Lifr	0.00563663	0.256809	0.211	0.162	1	General Capillary	Lifr
Gpd2	0.00734578	0.329009	0.306	0.282	1	General Capillary	Gpd2
Pcdha12	2.38604e-81	2.19866	0.935	0.257	4.32565e-77	Aerocyte Capillary	Pcdha12
Emp2	8.5724e-68	2.00296	0.855	0.25	1.55409e-63	Aerocyte Capillary	Emp2
Tmem47	7.4383e-62	1.82086	0.847	0.261	1.34849e-57	Aerocyte Capillary	Tmem47
Kitlg	4.52944e-60	1.87801	0.919	0.403	8.21142e-56	Aerocyte Capillary	Kitlg
Hopx	2.62328e-58	1.64554	0.919	0.373	4.75574e-54	Aerocyte Capillary	Hopx
Mapt	2.67995e-58	1.09376	0.452	0.034	4.85848e-54	Aerocyte Capillary	Mapt
Kdr	1.3197e-54	1.47955	0.976	0.751	2.39248e-50	Aerocyte Capillary	Kdr
Ednrb	9.4463e-53	1.75342	0.903	0.369	1.71252e-48	Aerocyte Capillary	Ednrb
Car4	1.0999e-52	1.58495	0.935	0.454	1.99401e-48	Aerocyte Capillary	Car4
Btbd3	9.65983e-43	1.47917	0.782	0.304	1.75123e-38	Aerocyte Capillary	Btbd3
S100a6	3.80077e-42	1.3888	0.935	0.601	6.89042e-38	Aerocyte Capillary	S100a6
Apln	2.38976e-41	1.34005	0.863	0.39	4.3324e-37	Aerocyte Capillary	Apln
Pmp22	3.09611e-41	1.13165	0.944	0.698	5.61295e-37	Aerocyte Capillary	Pmp22
Schip1	2.27892e-36	1.18665	0.645	0.194	4.13146e-32	Aerocyte Capillary	Schip1
Prx	5.59695e-34	1.11889	0.669	0.225	1.01467e-29	Aerocyte Capillary	Prx
Tmem204	1.44016e-33	1.13039	0.766	0.339	2.61088e-29	Aerocyte Capillary	Tmem204
Car2	1.41839e-32	1.11156	0.847	0.451	2.5714e-28	Aerocyte Capillary	Car2
Sirpa	1.20632e-31	0.862868	0.435	0.083	2.18694e-27	Aerocyte Capillary	Sirpa
Cd9	4.96619e-30	0.772977	0.976	0.972	9.0032e-26	Aerocyte Capillary	Cd9
Ptp4a3	2.34828e-29	1.05786	0.508	0.129	4.2572e-25	Aerocyte Capillary	Ptp4a3
Ptpn4	5.1912e-29	1.14713	0.621	0.217	9.41113e-25	Aerocyte Capillary	Ptpn4
Cst3	5.92254e-26	0.818629	0.903	0.64	1.0737e-21	Aerocyte Capillary	Cst3
Prdm1	1.38322e-25	0.850954	0.444	0.105	2.50764e-21	Aerocyte Capillary	Prdm1
Cd200	3.39173e-25	1.02983	0.629	0.244	6.14887e-21	Aerocyte Capillary	Cd200
C1qtnf1	3.80852e-25	0.647624	0.29	0.04	6.90447e-21	Aerocyte Capillary	C1qtnf1
Gimap7	3.85208e-23	0.754644	0.371	0.081	6.98344e-19	Aerocyte Capillary	Gimap7
S1pr4	5.16494e-23	0.579394	0.266	0.037	9.36351e-19	Aerocyte Capillary	S1pr4
2021-09-04	2.81974e-22	1.02614	0.718	0.389	5.11191e-18	Aerocyte Capillary	2021-09-04
Igfbp7	3.62544e-22	0.742417	0.911	0.754	6.57255e-18	Aerocyte Capillary	Igfbp7
Hspb1	4.47975e-22	1.05222	0.726	0.423	8.12133e-18	Aerocyte Capillary	Hspb1
Itgb5	5.35179e-22	0.659521	0.234	0.029	9.70226e-18	Aerocyte Capillary	Itgb5
Col4a4	5.52208e-22	0.86617	0.492	0.155	1.0011e-17	Aerocyte Capillary	Col4a4
Enpp6	4.55824e-21	0.316451	0.113	0.002	8.26364e-17	Aerocyte Capillary	Enpp6
RT1-CE41	8.66215e-21	0.589537	0.96	0.822	1.57036e-16	Aerocyte Capillary	RT1-CE4
AABR07040855.1	3.39054e-20	0.923096	0.5	0.177	6.14671e-16	Aerocyte Capillary	AABR07040855.1
Fmo1	1.02264e-19	0.788511	0.339	0.077	1.85395e-15	Aerocyte Capillary	Fmo1
Itm2b	7.82659e-19	0.657196	0.944	0.949	1.41888e-14	Aerocyte Capillary	Itm2b
Synm	1.15268e-18	0.674633	0.347	0.085	2.0897e-14	Aerocyte Capillary	Synm
Selenop	2.15355e-18	0.807599	0.387	0.111	3.90417e-14	Aerocyte Capillary	Selenop
Tmem136	3.72846e-18	0.581042	0.315	0.071	6.75932e-14	Aerocyte Capillary	Tmem136
Tmem254	4.56107e-18	0.816816	0.589	0.282	8.26876e-14	Aerocyte Capillary	Tmem254
Cd81	4.67381e-18	0.662617	0.863	0.798	8.47315e-14	Aerocyte Capillary	Cd81
Icam2	9.06251e-18	0.71582	0.871	0.784	1.64294e-13	Aerocyte Capillary	Icam2
AABR07044404.1	1.08418e-17	0.568173	0.234	0.039	1.96551e-13	Aerocyte Capillary	AABR07044404.1
Tspan12	1.92328e-17	0.854467	0.742	0.501	3.48672e-13	Aerocyte Capillary	Tspan12
Dpp4	2.37014e-17	0.757923	0.823	0.659	4.29682e-13	Aerocyte Capillary	Dpp4
Gabra1	4.04645e-17	0.592198	0.242	0.044	7.33582e-13	Aerocyte Capillary	Gabra1
B2m	1.38219e-16	0.490194	0.984	0.984	2.50577e-12	Aerocyte Capillary	B2m
Chst1	2.66777e-16	0.585418	0.21	0.035	4.8364e-12	Aerocyte Capillary	Chst1
Nrp1	5.13187e-16	0.789779	0.831	0.677	9.30356e-12	Aerocyte Capillary	Nrp1
Mgst2	1.18044e-15	0.546212	0.258	0.055	2.14001e-11	Aerocyte Capillary	Mgst2
Akap13	1.84385e-15	0.763747	0.613	0.321	3.34272e-11	Aerocyte Capillary	Akap13
Macf1	2.81128e-15	0.50052	0.952	0.885	5.09657e-11	Aerocyte Capillary	Macf1
Cyb5r3	1.09569e-14	0.713681	0.742	0.526	1.98637e-10	Aerocyte Capillary	Cyb5r3
Cdkn2b	1.19087e-14	0.377329	0.129	0.012	2.15894e-10	Aerocyte Capillary	Cdkn2b
Nck1	1.86967e-14	0.834398	0.669	0.42	3.38953e-10	Aerocyte Capillary	Nck1
RT1-CE5	2.45427e-14	0.701863	0.685	0.399	4.44934e-10	Aerocyte Capillary	RT1-CE5
Thbd	4.80935e-14	0.572198	0.911	0.863	8.71887e-10	Aerocyte Capillary	Thbd
Sparc	7.43981e-14	0.395863	0.984	0.996	1.34876e-09	Aerocyte Capillary	Sparc
Lyn	1.12975e-13	0.673358	0.742	0.559	2.04812e-09	Aerocyte Capillary	Lyn
Tagln2	1.32642e-13	0.418722	0.944	0.931	2.40467e-09	Aerocyte Capillary	Tagln2
Cdo1	1.39803e-13	0.372066	0.177	0.029	2.53449e-09	Aerocyte Capillary	Cdo1
Cldn5	2.23469e-13	0.525788	0.935	0.945	4.05128e-09	Aerocyte Capillary	Cldn5
Rcsd1	2.79814e-13	0.780023	0.565	0.308	5.07275e-09	Aerocyte Capillary	Rcsd1
Tmbim1	2.93402e-13	0.726746	0.435	0.184	5.31908e-09	Aerocyte Capillary	Tmbim1
Cyp4f6	3.01422e-13	0.328944	0.185	0.033	5.46449e-09	Aerocyte Capillary	Cyp4f6
Bcam	4.99558e-13	0.70204	0.694	0.467	9.05649e-09	Aerocyte Capillary	Bcam
Anxa5	1.01054e-12	0.603844	0.823	0.727	1.83201e-08	Aerocyte Capillary	Anxa5
Rin2	1.20712e-12	0.680582	0.516	0.262	2.18838e-08	Aerocyte Capillary	Rin2
AABR07001382.1	3.37116e-12	0.701535	0.54	0.291	6.11157e-08	Aerocyte Capillary	AABR07001382.1
AABR07040864.1	3.52732e-12	0.322926	0.161	0.027	6.39467e-08	Aerocyte Capillary	AABR07040864.1
Clec2g	3.65493e-12	0.519305	0.927	0.908	6.62601e-08	Aerocyte Capillary	Clec2g
Abcc9	4.6338e-12	0.331717	0.113	0.012	8.40062e-08	Aerocyte Capillary	Abcc9
Ass1	5.73264e-12	0.483885	0.25	0.069	1.03927e-07	Aerocyte Capillary	Ass1
Klf4	1.85222e-11	0.535801	0.815	0.652	3.35789e-07	Aerocyte Capillary	Klf4
Ifngr1	2.26476e-11	0.626488	0.694	0.465	4.10578e-07	Aerocyte Capillary	Ifngr1
Atp2b4	2.44057e-11	0.670132	0.548	0.301	4.4245e-07	Aerocyte Capillary	Atp2b4
Tpcn1	3.17397e-11	0.595313	0.331	0.12	5.75408e-07	Aerocyte Capillary	Tpcn1
Slco2a11	3.19403e-11	0.534598	0.831	0.698	5.79045e-07	Aerocyte Capillary	Slco2a1
Tmem255b	3.6544e-11	0.474253	0.29	0.094	6.62507e-07	Aerocyte Capillary	Tmem255b
Psmd10	3.97208e-11	0.575013	0.226	0.061	7.20098e-07	Aerocyte Capillary	Psmd10
Frmd6	6.87155e-11	0.478702	0.363	0.14	1.24574e-06	Aerocyte Capillary	Frmd6
Cndp2	8.17057e-11	0.58777	0.331	0.124	1.48124e-06	Aerocyte Capillary	Cndp2
Spon2	9.41696e-11	0.552009	0.298	0.104	1.7072e-06	Aerocyte Capillary	Spon2
Apcdd1	2.1578e-10	0.616724	0.282	0.096	3.91188e-06	Aerocyte Capillary	Apcdd1
Plxna2	2.88271e-10	0.568711	0.387	0.168	5.22606e-06	Aerocyte Capillary	Plxna2
Bicd2	3.00585e-10	0.570057	0.476	0.243	5.4493e-06	Aerocyte Capillary	Bicd2
Kif26b	3.05262e-10	0.313239	0.185	0.044	5.53409e-06	Aerocyte Capillary	Kif26b
LOC102551636	3.25697e-10	0.296667	0.161	0.033	5.90455e-06	Aerocyte Capillary	LOC102551636
Tppp31	3.32774e-10	0.618445	0.653	0.451	6.03286e-06	Aerocyte Capillary	Tppp3
Itga3	4.30063e-10	0.665668	0.411	0.193	7.79661e-06	Aerocyte Capillary	Itga3
Acsl1	5.32906e-10	0.510544	0.266	0.088	9.66106e-06	Aerocyte Capillary	Acsl1
Cd481	5.91492e-10	0.367259	0.927	0.944	1.07232e-05	Aerocyte Capillary	Cd48
Qpct	6.35563e-10	0.310447	0.185	0.045	1.15221e-05	Aerocyte Capillary	Qpct
Mfsd6	9.14548e-10	0.420534	0.194	0.05	1.65798e-05	Aerocyte Capillary	Mfsd6
Eva1b	9.47028e-10	0.578858	0.694	0.529	1.71687e-05	Aerocyte Capillary	Eva1b
Pim3	1.88092e-09	0.572755	0.403	0.188	3.40991e-05	Aerocyte Capillary	Pim3
Arhgap29	1.95627e-09	0.475327	0.758	0.648	3.54653e-05	Aerocyte Capillary	Arhgap29
Ehd4	1.98639e-09	0.493238	0.774	0.738	3.60112e-05	Aerocyte Capillary	Ehd4
Prickle2	2.18931e-09	0.562753	0.581	0.378	3.96899e-05	Aerocyte Capillary	Prickle2
Tbxa2r	5.99335e-09	0.494211	0.266	0.097	0.000108653	Aerocyte Capillary	Tbxa2r
App	6.57767e-09	0.45209	0.879	0.875	0.000119247	Aerocyte Capillary	App
Map2k5	7.35812e-09	0.545741	0.282	0.109	0.000133395	Aerocyte Capillary	Map2k5
Xdh	1.20207e-08	0.43276	0.25	0.086	0.000217922	Aerocyte Capillary	Xdh
Sptbn1	1.76395e-08	0.42162	0.823	0.812	0.000319786	Aerocyte Capillary	Sptbn1
Ctsl	1.86669e-08	0.422129	0.911	0.843	0.000338412	Aerocyte Capillary	Ctsl
Nsg1	3.15188e-08	0.545353	0.411	0.208	0.000571405	Aerocyte Capillary	Nsg1
Susd6	3.41376e-08	0.425472	0.266	0.099	0.00061888	Aerocyte Capillary	Susd6
Tns3	3.7193e-08	0.64394	0.395	0.208	0.000674271	Aerocyte Capillary	Tns3
Ahr	4.4725e-08	0.515862	0.79	0.766	0.000810819	Aerocyte Capillary	Ahr
Slc18b1	5.02297e-08	0.265294	0.137	0.032	0.000910614	Aerocyte Capillary	Slc18b1
Ankrd33b	5.29216e-08	0.430564	0.306	0.129	0.000959415	Aerocyte Capillary	Ankrd33b
Pls3	5.36537e-08	0.636041	0.492	0.299	0.000972688	Aerocyte Capillary	Pls3
Gcnt2	6.42799e-08	0.396366	0.226	0.079	0.00116533	Aerocyte Capillary	Gcnt2
Plat	7.04751e-08	0.48968	0.653	0.457	0.00127764	Aerocyte Capillary	Plat
Slc12a2	1.13878e-07	0.605584	0.444	0.252	0.00206449	Aerocyte Capillary	Slc12a2
Slc29a11	1.19018e-07	0.406803	0.815	0.74	0.00215767	Aerocyte Capillary	Slc29a1
Fth1	1.27104e-07	0.362827	0.927	0.915	0.00230427	Aerocyte Capillary	Fth1
Clec1a1	1.61298e-07	0.422856	0.766	0.67	0.00292418	Aerocyte Capillary	Clec1a
Reep3	1.71481e-07	0.480647	0.637	0.509	0.00310879	Aerocyte Capillary	Reep3
Daam1	2.77759e-07	0.540225	0.524	0.334	0.00503549	Aerocyte Capillary	Daam1
Pitpna	2.88468e-07	0.497339	0.556	0.376	0.00522964	Aerocyte Capillary	Pitpna
Cyp20a1	2.99361e-07	0.492916	0.339	0.164	0.00542712	Aerocyte Capillary	Cyp20a1
Itga4	3.02131e-07	0.389636	0.161	0.047	0.00547734	Aerocyte Capillary	Itga4
Hebp2	4.04293e-07	0.322771	0.194	0.064	0.00732943	Aerocyte Capillary	Hebp2
Sv2a	4.85374e-07	0.357464	0.194	0.067	0.00879935	Aerocyte Capillary	Sv2a
Map6	4.87887e-07	0.307751	0.194	0.064	0.00884491	Aerocyte Capillary	Map6
Pxdc11	5.29323e-07	0.48923	0.629	0.481	0.00959609	Aerocyte Capillary	Pxdc1
Cav2	5.77682e-07	0.428637	0.774	0.725	0.0104728	Aerocyte Capillary	Cav2
Flt1	6.0074e-07	0.5081	0.685	0.541	0.0108908	Aerocyte Capillary	Flt1
Rab6b	6.74423e-07	0.316527	0.202	0.071	0.0122266	Aerocyte Capillary	Rab6b
Arpc2	1.06316e-06	0.426565	0.774	0.708	0.019274	Aerocyte Capillary	Arpc2
Sh3bp4	1.269e-06	0.43951	0.298	0.141	0.0230057	Aerocyte Capillary	Sh3bp4
LOC100361457	1.40153e-06	0.254944	0.984	0.974	0.0254083	Aerocyte Capillary	LOC100361457
Vcl	1.45563e-06	0.549417	0.685	0.543	0.0263892	Aerocyte Capillary	Vcl
Lhfpl6	1.67727e-06	0.590796	0.484	0.315	0.0304072	Aerocyte Capillary	Lhfpl6
Foxf1	1.84425e-06	0.338851	0.887	0.847	0.0334344	Aerocyte Capillary	Foxf1
Gda	2.0068e-06	0.476725	0.524	0.351	0.0363813	Aerocyte Capillary	Gda
Txn1	2.06973e-06	0.28424	0.806	0.71	0.0375221	Aerocyte Capillary	Txn1
Adgrf51	2.19734e-06	0.324605	0.887	0.877	0.0398357	Aerocyte Capillary	Adgrf5
Pdgfb	2.82078e-06	0.550968	0.395	0.232	0.0511379	Aerocyte Capillary	Pdgfb
Selenof	3.13644e-06	0.334877	0.806	0.769	0.0568605	Aerocyte Capillary	Selenof
Plpp3	3.64086e-06	0.525192	0.597	0.45	0.0660052	Aerocyte Capillary	Plpp3
RT1-T24-41	3.8702e-06	0.33865	0.863	0.834	0.0701629	Aerocyte Capillary	RT1-T24-4
Pnkd	4.06958e-06	0.608257	0.476	0.342	0.0737773	Aerocyte Capillary	Pnkd
Npw	4.27886e-06	0.457601	0.25	0.113	0.0775714	Aerocyte Capillary	Npw
Ccnd3	4.41386e-06	0.587893	0.419	0.262	0.0800189	Aerocyte Capillary	Ccnd3
Arhgef10	4.8906e-06	0.356103	0.266	0.12	0.0886618	Aerocyte Capillary	Arhgef10
Acot7	6.24243e-06	0.401702	0.161	0.056	0.113169	Aerocyte Capillary	Acot7
Akr1c15	6.40846e-06	0.334563	0.806	0.697	0.116179	Aerocyte Capillary	Akr1c15
Slco2b1	6.61067e-06	0.313705	0.185	0.069	0.119845	Aerocyte Capillary	Slco2b1
Plscr1	6.62963e-06	0.409478	0.25	0.112	0.120189	Aerocyte Capillary	Plscr1
Gadd45b	6.66866e-06	0.348043	0.21	0.084	0.120896	Aerocyte Capillary	Gadd45b
Rras	7.49056e-06	0.468601	0.444	0.285	0.135796	Aerocyte Capillary	Rras
Chmp5	8.9438e-06	0.327933	0.742	0.654	0.162142	Aerocyte Capillary	Chmp5
Cd99	9.03678e-06	0.3676	0.742	0.69	0.163828	Aerocyte Capillary	Cd99
Plac9	9.31282e-06	0.334105	0.194	0.076	0.168832	Aerocyte Capillary	Plac9
Stxbp1	1.26337e-05	0.461733	0.21	0.092	0.229037	Aerocyte Capillary	Stxbp1
Xpnpep2	1.31541e-05	0.402583	0.25	0.116	0.238471	Aerocyte Capillary	Xpnpep2
Ift43	1.73274e-05	0.399459	0.282	0.142	0.314129	Aerocyte Capillary	Ift43
Spry1	2.51519e-05	0.348573	0.194	0.081	0.455979	Aerocyte Capillary	Spry1
Mfng	3.06536e-05	0.41215	0.46	0.315	0.555718	Aerocyte Capillary	Mfng
Ushbp1	3.46701e-05	0.416071	0.29	0.152	0.628535	Aerocyte Capillary	Ushbp1
Pon2	3.78871e-05	0.395997	0.677	0.571	0.686855	Aerocyte Capillary	Pon2
Clic51	4.55739e-05	0.391983	0.581	0.437	0.826209	Aerocyte Capillary	Clic5
AC134224.3	4.58328e-05	0.324074	1	1	0.830904	Aerocyte Capillary	AC134224.3
Vangl2	5.17338e-05	0.369886	0.258	0.13	0.937882	Aerocyte Capillary	Vangl2
Dux4	5.7778e-05	0.252011	0.137	0.048	1	Aerocyte Capillary	Dux4
Mgll	5.96664e-05	0.361576	0.452	0.302	1	Aerocyte Capillary	Mgll
Rgs12	6.59284e-05	0.36537	0.516	0.376	1	Aerocyte Capillary	Rgs12
Sec62	6.76182e-05	0.261688	0.831	0.855	1	Aerocyte Capillary	Sec62
Srbd1	7.10931e-05	0.342564	0.339	0.196	1	Aerocyte Capillary	Srbd1
Dyrk2	7.38615e-05	0.334346	0.355	0.214	1	Aerocyte Capillary	Dyrk2
Tmcc2	8.6275e-05	0.451276	0.484	0.349	1	Aerocyte Capillary	Tmcc2
Cyb5a	8.79312e-05	0.412459	0.605	0.522	1	Aerocyte Capillary	Cyb5a
Wscd1	8.8816e-05	0.354251	0.258	0.133	1	Aerocyte Capillary	Wscd1
Slc9a3r2	8.9102e-05	0.357296	0.734	0.686	1	Aerocyte Capillary	Slc9a3r2
Tob1	9.61314e-05	0.383907	0.202	0.095	1	Aerocyte Capillary	Tob1
Nrip1	9.87877e-05	0.470983	0.323	0.188	1	Aerocyte Capillary	Nrip1
B3galnt1	9.90393e-05	0.471252	0.29	0.162	1	Aerocyte Capillary	B3galnt1
Lrp4	0.000106679	0.284468	0.177	0.076	1	Aerocyte Capillary	Lrp4
Rab38	0.00011024	0.329348	0.226	0.11	1	Aerocyte Capillary	Rab38
LOC689574	0.000110383	0.410543	0.613	0.495	1	Aerocyte Capillary	LOC689574
Pam	0.000115743	0.304032	0.524	0.359	1	Aerocyte Capillary	Pam
Actr2	0.000116978	0.360694	0.669	0.623	1	Aerocyte Capillary	Actr2
Cald1	0.00012019	0.285852	0.718	0.587	1	Aerocyte Capillary	Cald1
Pdcd10	0.000125633	0.29512	0.75	0.732	1	Aerocyte Capillary	Pdcd10
Tmem176b	0.000126351	0.449896	0.468	0.333	1	Aerocyte Capillary	Tmem176b
Pwwp2b	0.000127831	0.392944	0.234	0.119	1	Aerocyte Capillary	Pwwp2b
Pcdh19	0.000134176	0.417296	0.29	0.164	1	Aerocyte Capillary	Pcdh19
Nes	0.000138236	0.474828	0.403	0.278	1	Aerocyte Capillary	Nes
Gypc	0.000147762	0.590311	0.331	0.207	1	Aerocyte Capillary	Gypc
Zdhhc12	0.000150361	0.317122	0.218	0.107	1	Aerocyte Capillary	Zdhhc12
Trib2	0.00017023	0.342177	0.597	0.462	1	Aerocyte Capillary	Trib2
Myo6	0.000192836	0.358302	0.452	0.296	1	Aerocyte Capillary	Myo6
Pdlim2	0.000194848	0.311466	0.202	0.095	1	Aerocyte Capillary	Pdlim2
Rarg	0.000210174	0.318806	0.274	0.152	1	Aerocyte Capillary	Rarg
Rock2	0.000235136	0.391732	0.597	0.514	1	Aerocyte Capillary	Rock2
Thsd1	0.000240595	0.41803	0.532	0.437	1	Aerocyte Capillary	Thsd1
Ptpre	0.000247358	0.312705	0.121	0.045	1	Aerocyte Capillary	Ptpre
Tjp1	0.000257918	0.326776	0.702	0.679	1	Aerocyte Capillary	Tjp1
Nid2	0.000259822	0.319025	0.218	0.11	1	Aerocyte Capillary	Nid2
Lef1	0.000265665	0.271968	0.226	0.112	1	Aerocyte Capillary	Lef1
Vav3	0.000278846	0.402631	0.363	0.237	1	Aerocyte Capillary	Vav3
Bambi	0.00029993	0.284788	0.226	0.115	1	Aerocyte Capillary	Bambi
Ubl7	0.000327699	0.323192	0.226	0.119	1	Aerocyte Capillary	Ubl7
St5	0.000329137	0.393831	0.387	0.252	1	Aerocyte Capillary	St5
Neb	0.000329247	0.340996	0.315	0.186	1	Aerocyte Capillary	Neb
Rasal2	0.000335549	0.387437	0.379	0.25	1	Aerocyte Capillary	Rasal2
Lgals1	0.000338044	0.448599	0.508	0.372	1	Aerocyte Capillary	Lgals1
Tagln	0.000371026	0.473069	0.363	0.227	1	Aerocyte Capillary	Tagln
Mylip	0.000381784	0.380486	0.242	0.135	1	Aerocyte Capillary	Mylip
Gale	0.000421663	0.250081	0.21	0.104	1	Aerocyte Capillary	Gale
Rassf8	0.000503071	0.349813	0.282	0.165	1	Aerocyte Capillary	Rassf8
Sem1	0.000528313	0.296144	0.806	0.793	1	Aerocyte Capillary	Sem1
Sdc3	0.000550097	0.447285	0.476	0.354	1	Aerocyte Capillary	Sdc3
Snx7	0.000561305	0.308332	0.218	0.116	1	Aerocyte Capillary	Snx7
P3h1	0.000575423	0.300428	0.161	0.075	1	Aerocyte Capillary	P3h1
Map1lc3a	0.000576108	0.327827	0.661	0.59	1	Aerocyte Capillary	Map1lc3a
Srp14	0.000615313	0.370561	0.589	0.496	1	Aerocyte Capillary	Srp14
Adgrl2	0.000659323	0.298534	0.621	0.508	1	Aerocyte Capillary	Adgrl2
Pf4	0.000719331	0.506018	0.129	0.052	1	Aerocyte Capillary	Pf4
Cnn3	0.000764832	0.299962	0.702	0.713	1	Aerocyte Capillary	Cnn3
Ndfip1	0.000782963	0.299516	0.645	0.547	1	Aerocyte Capillary	Ndfip1
Arhgef12	0.00091045	0.37818	0.331	0.21	1	Aerocyte Capillary	Arhgef12
Acvrl1	0.000958516	0.343892	0.669	0.619	1	Aerocyte Capillary	Acvrl1
Lpin2	0.000966488	0.257316	0.242	0.136	1	Aerocyte Capillary	Lpin2
Lmna	0.000968389	0.389635	0.444	0.322	1	Aerocyte Capillary	Lmna
Ccdc68	0.00100174	0.382171	0.331	0.218	1	Aerocyte Capillary	Ccdc68
Cyb5r1	0.00101174	0.252011	0.218	0.116	1	Aerocyte Capillary	Cyb5r1
Fat1	0.00111967	0.345728	0.282	0.176	1	Aerocyte Capillary	Fat1
Vat1	0.00116458	0.320138	0.645	0.617	1	Aerocyte Capillary	Vat1
A3galt2	0.00117181	0.297922	0.153	0.072	1	Aerocyte Capillary	A3galt2
Arhgef3	0.00119983	0.350442	0.379	0.265	1	Aerocyte Capillary	Arhgef3
Tmem35b	0.00122204	0.36043	0.185	0.095	1	Aerocyte Capillary	Tmem35b
Podxl	0.00128029	0.343718	0.677	0.614	1	Aerocyte Capillary	Podxl
Jun	0.00136023	0.294498	0.677	0.609	1	Aerocyte Capillary	Jun
Grk5	0.00141936	0.354956	0.266	0.16	1	Aerocyte Capillary	Grk5
Epha4	0.00146655	0.3766	0.347	0.231	1	Aerocyte Capillary	Epha4
Lama4	0.00148509	0.394219	0.315	0.204	1	Aerocyte Capillary	Lama4
RT1-A1	0.00180081	0.32547	0.274	0.168	1	Aerocyte Capillary	RT1-A1
Lpcat1	0.00220643	0.296916	0.266	0.162	1	Aerocyte Capillary	Lpcat1
C1qtnf2	0.00230544	0.27491	0.234	0.137	1	Aerocyte Capillary	C1qtnf2
Lmcd1	0.00260281	0.278249	0.185	0.1	1	Aerocyte Capillary	Lmcd1
Tshz3	0.00262479	0.285954	0.105	0.044	1	Aerocyte Capillary	Tshz3
Cybrd1	0.00265092	0.270761	0.153	0.076	1	Aerocyte Capillary	Cybrd1
Sh3tc1	0.00267199	0.276673	0.298	0.193	1	Aerocyte Capillary	Sh3tc1
Hspa12b	0.00278817	0.271996	0.363	0.246	1	Aerocyte Capillary	Hspa12b
Lmbrd1	0.0028864	0.298161	0.339	0.233	1	Aerocyte Capillary	Lmbrd1
Higd1b	0.00296336	0.322085	0.258	0.158	1	Aerocyte Capillary	Higd1b
RGD1308117	0.00301941	0.301713	0.194	0.106	1	Aerocyte Capillary	RGD1308117
Sin3b	0.00307719	0.354144	0.355	0.254	1	Aerocyte Capillary	Sin3b
Shisa5	0.00313691	0.316617	0.444	0.362	1	Aerocyte Capillary	Shisa5
Slc44a2	0.00315655	0.290781	0.371	0.264	1	Aerocyte Capillary	Slc44a2
Kank3	0.00327293	0.369245	0.347	0.246	1	Aerocyte Capillary	Kank3
Bin1	0.00339129	0.384801	0.194	0.112	1	Aerocyte Capillary	Bin1
Itgb1bp1	0.00339702	0.282496	0.427	0.322	1	Aerocyte Capillary	Itgb1bp1
Rhoj	0.00361986	0.305021	0.629	0.594	1	Aerocyte Capillary	Rhoj
AABR07066180.1	0.00376631	0.343988	0.306	0.206	1	Aerocyte Capillary	AABR07066180.1
Tdrp	0.00390897	0.290918	0.194	0.11	1	Aerocyte Capillary	Tdrp
Man1c1	0.004163	0.406132	0.169	0.093	1	Aerocyte Capillary	Man1c1
C1galt1c1	0.00419767	0.327855	0.419	0.335	1	Aerocyte Capillary	C1galt1c1
Serinc3	0.00428787	0.3715	0.613	0.585	1	Aerocyte Capillary	Serinc3
Mylk	0.00438808	0.342265	0.468	0.364	1	Aerocyte Capillary	Mylk
Tmem176a	0.00494283	0.317857	0.379	0.278	1	Aerocyte Capillary	Tmem176a
Reep5	0.00503783	0.281972	0.653	0.617	1	Aerocyte Capillary	Reep5
Selenok	0.00507995	0.273607	0.685	0.679	1	Aerocyte Capillary	Selenok
Tcn2	0.00514029	0.272651	0.629	0.585	1	Aerocyte Capillary	Tcn2
Tgfbr1	0.00514194	0.359655	0.177	0.099	1	Aerocyte Capillary	Tgfbr1
Phactr2	0.00517968	0.262789	0.266	0.171	1	Aerocyte Capillary	Phactr2
Dynlrb1	0.00528395	0.288704	0.677	0.638	1	Aerocyte Capillary	Dynlrb1
Zmat5	0.00548664	0.261302	0.202	0.119	1	Aerocyte Capillary	Zmat5
Cdipt	0.00563457	0.30877	0.355	0.255	1	Aerocyte Capillary	Cdipt
Ctsd	0.00566817	0.289626	0.532	0.447	1	Aerocyte Capillary	Ctsd
Copa	0.00576908	0.275885	0.427	0.334	1	Aerocyte Capillary	Copa
Col6a2	0.0058715	0.286022	0.21	0.126	1	Aerocyte Capillary	Col6a2
Rgl1	0.0059123	0.373117	0.242	0.153	1	Aerocyte Capillary	Rgl1
Sipa1l2	0.0059366	0.273383	0.194	0.112	1	Aerocyte Capillary	Sipa1l2
Adam17	0.006002	0.259459	0.331	0.231	1	Aerocyte Capillary	Adam17
Rbms1	0.00613663	0.25683	0.597	0.535	1	Aerocyte Capillary	Rbms1
Ctsa	0.00615826	0.278866	0.556	0.518	1	Aerocyte Capillary	Ctsa
Crip1	0.00683148	0.299513	0.734	0.724	1	Aerocyte Capillary	Crip1
Selenos	0.00689237	0.33916	0.419	0.336	1	Aerocyte Capillary	Selenos
Mysm1	0.0072288	0.379801	0.435	0.362	1	Aerocyte Capillary	Mysm1
Mgmt	0.00724184	0.265706	0.153	0.084	1	Aerocyte Capillary	Mgmt
Col3a1	0.00738765	0.815667	0.653	0.59	1	Aerocyte Capillary	Col3a1
Nthl1	0.00739938	0.366361	0.323	0.232	1	Aerocyte Capillary	Nthl1
Dnm2	0.00751295	0.266442	0.323	0.225	1	Aerocyte Capillary	Dnm2
Fam204a	0.00768804	0.292825	0.298	0.203	1	Aerocyte Capillary	Fam204a
Gnb2	0.00772538	0.261839	0.71	0.667	1	Aerocyte Capillary	Gnb2
Pcdh171	0.00773825	0.252347	0.645	0.568	1	Aerocyte Capillary	Pcdh17
Cdc42ep2	0.00793235	0.272954	0.379	0.285	1	Aerocyte Capillary	Cdc42ep2
Dhrs3	0.00920908	0.294055	0.331	0.246	1	Aerocyte Capillary	Dhrs3
Gtf2a1	0.00943496	0.297056	0.298	0.216	1	Aerocyte Capillary	Gtf2a1
Sertad1	0.00973674	0.257364	0.379	0.279	1	Aerocyte Capillary	Sertad1
Cenpf	2.38957e-111	2.26573	0.838	0.091	4.33205e-107	Cycling	Cenpf
Prc1	2.62874e-110	1.98769	0.811	0.081	4.76565e-106	Cycling	Prc1
Mki67	9.09844e-109	2.13827	0.926	0.156	1.64946e-104	Cycling	Mki67
Pimreg	3.7754e-108	1.39421	0.615	0.02	6.84442e-104	Cycling	Pimreg
LOC100359539	2.9672e-107	1.70246	0.77	0.066	5.37923e-103	Cycling	LOC100359539
Nusap1	7.22137e-107	2.10398	0.777	0.075	1.30916e-102	Cycling	Nusap1
Tpx2	8.20461e-107	1.78058	0.777	0.071	1.48741e-102	Cycling	Tpx2
Cenpw	4.55919e-95	1.25838	0.642	0.041	8.26536e-91	Cycling	Cenpw
Top2a	1.12767e-91	2.30787	0.858	0.161	2.04435e-87	Cycling	Top2a
Kif20b	1.33257e-90	1.4176	0.676	0.059	2.41582e-86	Cycling	Kif20b
Depdc1	1.77126e-89	1.29796	0.568	0.029	3.21111e-85	Cycling	Depdc1
Nuf2	2.19997e-89	1.40043	0.689	0.067	3.98833e-85	Cycling	Nuf2
Bub1	3.08179e-88	1.37926	0.669	0.062	5.58699e-84	Cycling	Bub1
Sgo2	8.85504e-88	1.22293	0.547	0.026	1.60533e-83	Cycling	Sgo2
Racgap1	1.30499e-85	1.02512	0.574	0.034	2.36581e-81	Cycling	Racgap1
Cks2	6.51526e-85	1.66459	0.676	0.074	1.18115e-80	Cycling	Cks2
Kif22	7.74477e-85	1.09673	0.574	0.037	1.40405e-80	Cycling	Kif22
Cenpe	6.52818e-83	1.55084	0.703	0.084	1.18349e-78	Cycling	Cenpe
Kif11	4.43043e-82	1.22218	0.601	0.048	8.03193e-78	Cycling	Kif11
Birc5	1.13789e-81	1.32608	0.635	0.059	2.06288e-77	Cycling	Birc5
Hmgb2	4.87985e-81	2.13997	1	0.604	8.84668e-77	Cycling	Hmgb2
Cdk1	1.61636e-80	1.72755	0.872	0.204	2.93029e-76	Cycling	Cdk1
Spc25	1.43864e-79	0.925642	0.574	0.044	2.60811e-75	Cycling	Spc25
Ect2	3.50347e-79	1.08778	0.527	0.031	6.35144e-75	Cycling	Ect2
Cdca8	4.72812e-78	1.1556	0.669	0.076	8.5716e-74	Cycling	Cdca8
Ttk	2.14841e-75	0.928203	0.52	0.034	3.89486e-71	Cycling	Ttk
Smc4	1.19958e-74	1.58709	0.912	0.305	2.17471e-70	Cycling	Smc4
Hmmr	2.00424e-73	1.47502	0.595	0.06	3.63349e-69	Cycling	Hmmr
Pbk	4.13778e-73	0.969934	0.5	0.03	7.50139e-69	Cycling	Pbk
Aspm	4.43707e-73	1.05425	0.48	0.026	8.04396e-69	Cycling	Aspm
Ckap2	5.04209e-73	1.16508	0.568	0.05	9.1408e-69	Cycling	Ckap2
Cdkn3	7.80715e-73	1.48041	0.635	0.077	1.41536e-68	Cycling	Cdkn3
Hist1h2an	3.39956e-72	1.24102	0.554	0.048	6.16306e-68	Cycling	Hist1h2an
Cep55	2.7215e-71	0.813417	0.439	0.018	4.93381e-67	Cycling	Cep55
Ube2c	2.80308e-71	1.63975	0.615	0.073	5.08171e-67	Cycling	Ube2c
Hist1h1b	4.31129e-71	1.7344	0.696	0.111	7.81594e-67	Cycling	Hist1h1b
Pttg1	2.0633e-70	1.7442	0.615	0.077	3.74055e-66	Cycling	Pttg1
Kif18a	2.79248e-69	0.886711	0.486	0.031	5.06249e-65	Cycling	Kif18a
Ndc80	1.60238e-68	0.98701	0.547	0.052	2.90495e-64	Cycling	Ndc80
Kifc1	1.10459e-67	0.859807	0.473	0.03	2.00251e-63	Cycling	Kifc1
Smc2	1.18181e-67	1.38579	0.892	0.286	2.1425e-63	Cycling	Smc2
Ncaph	2.22343e-66	0.862995	0.473	0.031	4.03086e-62	Cycling	Ncaph
Fbxo5	2.86584e-66	1.04925	0.554	0.058	5.19548e-62	Cycling	Fbxo5
Spc24	3.6706e-66	0.982058	0.554	0.057	6.65443e-62	Cycling	Spc24
Kif4a	4.52901e-65	0.979425	0.541	0.053	8.21063e-61	Cycling	Kif4a
Kif20a	2.42427e-64	0.760294	0.432	0.024	4.39496e-60	Cycling	Kif20a
AABR07000658.1	6.93048e-64	1.16211	0.507	0.045	1.25643e-59	Cycling	AABR07000658.1
Tuba1b	1.75477e-62	1.25613	0.98	0.693	3.18123e-58	Cycling	Tuba1b
Plk4	2.18655e-62	0.831084	0.473	0.038	3.964e-58	Cycling	Plk4
Mastl	2.48793e-62	0.83281	0.399	0.019	4.51036e-58	Cycling	Mastl
H2afx	9.11675e-62	1.36277	0.703	0.142	1.65278e-57	Cycling	H2afx
Hmgn2	2.08058e-61	1.32516	0.966	0.641	3.77188e-57	Cycling	Hmgn2
Melk	2.95684e-61	0.743366	0.412	0.022	5.36046e-57	Cycling	Melk
Fam111a	1.09027e-60	0.857102	0.459	0.036	1.97656e-56	Cycling	Fam111a
Tacc3	1.27715e-60	0.915256	0.486	0.045	2.31534e-56	Cycling	Tacc3
Pclaf	2.67714e-60	0.836953	0.473	0.038	4.85339e-56	Cycling	Pclaf
Cdca3	2.91846e-60	0.843373	0.412	0.024	5.29088e-56	Cycling	Cdca3
AABR07026311.1	2.0084e-58	1.24608	0.966	0.601	3.64102e-54	Cycling	AABR07026311.1
Esco2	3.47215e-58	0.898769	0.432	0.031	6.29467e-54	Cycling	Esco2
Ccna2	8.70071e-57	0.711518	0.453	0.038	1.57735e-52	Cycling	Ccna2
Stmn1	2.44117e-56	0.964258	0.993	0.946	4.4256e-52	Cycling	Stmn1
Kif15	2.80852e-56	0.862139	0.534	0.068	5.09157e-52	Cycling	Kif15
Cdca2	4.99404e-56	0.806463	0.378	0.02	9.05369e-52	Cycling	Cdca2
Incenp	1.29184e-55	0.765957	0.432	0.036	2.34197e-51	Cycling	Incenp
Cdc20	6.75461e-55	1.01552	0.399	0.028	1.22454e-50	Cycling	Cdc20
Plk1	1.60934e-54	0.738895	0.365	0.019	2.91758e-50	Cycling	Plk1
Ccnb1	4.1587e-54	1.22628	0.446	0.043	7.53931e-50	Cycling	Ccnb1
Knstrn	5.01984e-54	0.824074	0.439	0.039	9.10047e-50	Cycling	Knstrn
Kif23	8.17837e-54	1.11157	0.601	0.108	1.48266e-49	Cycling	Kif23
Dlgap5	3.0882e-52	1.06664	0.554	0.088	5.59859e-48	Cycling	Dlgap5
Cenpa	4.30257e-52	0.777155	0.372	0.024	7.80013e-48	Cycling	Cenpa
Iqgap3	1.0049e-51	0.52305	0.291	0.007	1.82179e-47	Cycling	Iqgap3
Cdk5rap2	2.52466e-51	0.917313	0.568	0.094	4.57695e-47	Cycling	Cdk5rap2
Ckap2l	5.80406e-51	0.70078	0.331	0.016	1.05222e-46	Cycling	Ckap2l
Knl1	4.80357e-50	0.732656	0.426	0.043	8.7084e-46	Cycling	Knl1
Tubb5	1.10556e-49	0.844734	0.993	0.891	2.00426e-45	Cycling	Tubb5
Bub1b	3.88621e-49	0.547403	0.277	0.007	7.04532e-45	Cycling	Bub1b
Hist1h1d	7.52067e-49	0.827749	0.419	0.041	1.36342e-44	Cycling	Hist1h1d
Aurkb	9.53157e-48	0.687482	0.412	0.04	1.72798e-43	Cycling	Aurkb
Ska1	2.4087e-47	0.54725	0.304	0.013	4.36672e-43	Cycling	Ska1
Cks1b	4.57223e-47	1.09387	0.743	0.234	8.289e-43	Cycling	Cks1b
Hist1h2bk	1.998e-45	0.609929	0.345	0.025	3.62217e-41	Cycling	Hist1h2bk
Arhgap11a	9.77363e-45	0.631134	0.372	0.034	1.77186e-40	Cycling	Arhgap11a
Ncapg2	5.59879e-44	0.869502	0.486	0.076	1.015e-39	Cycling	Ncapg2
Diaph3	2.23182e-43	0.509362	0.331	0.025	4.04606e-39	Cycling	Diaph3
Kif18b	5.58031e-43	0.620003	0.311	0.02	1.01165e-38	Cycling	Kif18b
Cenpk	1.49953e-42	0.687859	0.426	0.054	2.71849e-38	Cycling	Cenpk
Espl1	1.93385e-42	0.440364	0.257	0.009	3.50588e-38	Cycling	Espl1
Cenpi	1.98501e-42	0.556729	0.324	0.024	3.59863e-38	Cycling	Cenpi
Atad5	1.10826e-41	0.756991	0.432	0.059	2.00916e-37	Cycling	Atad5
Ncapg	1.50993e-41	0.597848	0.318	0.024	2.73735e-37	Cycling	Ncapg
Mis18bp1	4.00159e-41	0.74883	0.392	0.047	7.25448e-37	Cycling	Mis18bp1
Cep295	5.80493e-41	0.897041	0.486	0.084	1.05238e-36	Cycling	Cep295
Uhrf1	2.68593e-40	0.602866	0.399	0.049	4.86932e-36	Cycling	Uhrf1
LOC100359583	3.71278e-40	0.554155	1	0.987	6.7309e-36	Cycling	LOC100359583
Cenpt	5.35421e-40	0.461137	0.297	0.02	9.70665e-36	Cycling	Cenpt
Kif2c	8.57857e-40	0.56305	0.338	0.031	1.55521e-35	Cycling	Kif2c
Ran	1.5557e-39	0.913117	0.905	0.563	2.82033e-35	Cycling	Ran
Nasp	6.74553e-39	0.960748	0.838	0.398	1.2229e-34	Cycling	Nasp
Ezh2	7.94681e-39	0.964886	0.764	0.26	1.44068e-34	Cycling	Ezh2
Dut	8.21197e-39	0.946922	0.682	0.211	1.48875e-34	Cycling	Dut
LOC100911204	5.11753e-38	0.471736	0.23	0.008	9.27758e-34	Cycling	LOC100911204
Hist1h1e	6.01609e-38	1.37019	0.777	0.339	1.09066e-33	Cycling	Hist1h1e
Stil	9.9614e-38	0.544806	0.277	0.019	1.8059e-33	Cycling	Stil
Tmpo	2.59475e-37	0.943261	0.784	0.325	4.70403e-33	Cycling	Tmpo
Gmnn	3.46295e-37	0.900406	0.561	0.132	6.27799e-33	Cycling	Gmnn
Cip2a	6.21005e-37	0.60651	0.284	0.021	1.12582e-32	Cycling	Cip2a
Cdkn2c	6.94295e-37	0.635478	0.351	0.04	1.25869e-32	Cycling	Cdkn2c
Lmnb1	8.23759e-37	0.556992	0.392	0.053	1.49339e-32	Cycling	Lmnb1
Tuba1c	1.63055e-35	0.726265	0.338	0.039	2.95603e-31	Cycling	Tuba1c
Brca1	2.43105e-35	0.720172	0.345	0.043	4.40725e-31	Cycling	Brca1
Rad51ap1	4.72898e-35	0.619585	0.378	0.054	8.57316e-31	Cycling	Rad51ap1
Dek	1.05922e-34	0.940488	0.811	0.403	1.92026e-30	Cycling	Dek
Ccdc34	1.75114e-34	0.736147	0.507	0.112	3.17464e-30	Cycling	Ccdc34
Aurka	2.41852e-34	0.523301	0.257	0.018	4.38453e-30	Cycling	Aurka
Sgo1	2.64558e-34	0.503487	0.257	0.018	4.79617e-30	Cycling	Sgo1
Spag5.1	4.08124e-34	0.487107	0.277	0.024	7.39887e-30	Cycling	Spag5.1
Arhgap19	4.55106e-34	0.453673	0.25	0.017	8.25061e-30	Cycling	Arhgap19
Tk1	2.68331e-33	0.588072	0.331	0.041	4.86458e-29	Cycling	Tk1
Rrm2	2.82484e-33	0.416547	0.223	0.011	5.12116e-29	Cycling	Rrm2
Asf1b	2.93024e-33	0.523837	0.311	0.035	5.31223e-29	Cycling	Asf1b
Gen1	3.0451e-33	0.55919	0.277	0.025	5.52046e-29	Cycling	Gen1
Ska2	3.98599e-32	0.822802	0.608	0.188	7.2262e-28	Cycling	Ska2
Tubb4b	6.63921e-32	1.07517	0.73	0.317	1.20362e-27	Cycling	Tubb4b
Tubb6	1.08746e-31	0.858198	0.75	0.328	1.97145e-27	Cycling	Tubb6
Mxd3	2.85974e-31	0.685315	0.514	0.13	5.18442e-27	Cycling	Mxd3
Kif14	3.98275e-31	0.379424	0.189	0.007	7.22033e-27	Cycling	Kif14
Anln	4.00506e-31	0.388227	0.216	0.012	7.26077e-27	Cycling	Anln
Troap	6.9452e-31	0.327198	0.169	0.003	1.2591e-26	Cycling	Troap
Cenph	2.43785e-30	0.49634	0.318	0.043	4.41957e-26	Cycling	Cenph
Ckap5	5.14501e-30	0.886148	0.554	0.174	9.3274e-26	Cycling	Ckap5
Rad51	1.25522e-28	0.498745	0.277	0.032	2.27558e-24	Cycling	Rad51
Brip1	1.33781e-28	0.402886	0.236	0.02	2.42532e-24	Cycling	Brip1
Atad2	2.26991e-28	0.893323	0.493	0.137	4.11513e-24	Cycling	Atad2
Rrm1	2.44808e-28	0.811032	0.588	0.197	4.43813e-24	Cycling	Rrm1
Arhgef39	3.98878e-28	0.435018	0.209	0.015	7.23126e-24	Cycling	Arhgef39
Haus4	5.94103e-28	0.562296	0.399	0.083	1.07705e-23	Cycling	Haus4
Nucks1	7.11163e-28	0.752633	0.669	0.275	1.28927e-23	Cycling	Nucks1
Cenpc	1.09398e-27	0.68914	0.547	0.17	1.98328e-23	Cycling	Cenpc
Mcm10	1.69641e-27	0.422685	0.243	0.025	3.07541e-23	Cycling	Mcm10
Ube2t	7.91774e-27	0.314149	0.155	0.004	1.43541e-22	Cycling	Ube2t
Trim59	2.97749e-26	0.486043	0.324	0.055	5.3979e-22	Cycling	Trim59
Ska3	3.69853e-26	0.3705	0.216	0.019	6.70506e-22	Cycling	Ska3
Fancd2	3.80128e-26	0.279746	0.169	0.008	6.89134e-22	Cycling	Fancd2
Tcf19	8.31933e-26	0.690539	0.392	0.087	1.50821e-21	Cycling	Tcf19
Ube2s	1.09612e-25	0.713831	0.696	0.293	1.98715e-21	Cycling	Ube2s
Mdm1	1.26437e-25	0.53233	0.318	0.056	2.29218e-21	Cycling	Mdm1
Shcbp1	1.52089e-25	0.373475	0.196	0.015	2.75722e-21	Cycling	Shcbp1
Gas2l3	2.25135e-25	0.488277	0.223	0.022	4.08147e-21	Cycling	Gas2l3
Usp1	3.60738e-25	0.698634	0.527	0.171	6.53981e-21	Cycling	Usp1
Prim1	3.90398e-25	0.846482	0.689	0.312	7.07752e-21	Cycling	Prim1
Kpna2	4.16666e-25	0.553804	0.264	0.036	7.55373e-21	Cycling	Kpna2
Rangap1	5.41091e-25	0.449519	0.291	0.046	9.80945e-21	Cycling	Rangap1
Arl6ip1	6.93279e-25	1.39103	0.784	0.476	1.25685e-20	Cycling	Arl6ip1
Dctpp1	8.0411e-25	0.536596	0.365	0.075	1.45777e-20	Cycling	Dctpp1
AABR07069282.1	9.5145e-25	0.252966	0.162	0.008	1.72488e-20	Cycling	AABR07069282.1
Ncapd3	2.81969e-24	0.549937	0.351	0.073	5.11181e-20	Cycling	Ncapd3
Spdl1	2.93453e-24	0.36164	0.223	0.024	5.32002e-20	Cycling	Spdl1
Parpbp	4.55327e-24	0.436226	0.169	0.01	8.25462e-20	Cycling	Parpbp
Plp2	4.60838e-24	0.663304	0.568	0.189	8.35452e-20	Cycling	Plp2
Anp32e	9.64363e-24	0.794156	0.757	0.439	1.74829e-19	Cycling	Anp32e
Slfn13	1.50874e-23	0.55175	0.284	0.047	2.7352e-19	Cycling	Slfn13
Sapcd2	3.2585e-23	0.26532	0.155	0.008	5.90734e-19	Cycling	Sapcd2
Gtse1	6.54747e-23	0.298701	0.182	0.015	1.18699e-18	Cycling	Gtse1
Hint1	8.52687e-23	0.653762	0.885	0.653	1.54584e-18	Cycling	Hint1
Rfc4	9.82978e-23	0.632018	0.52	0.174	1.78204e-18	Cycling	Rfc4
G2e3	1.2106e-22	0.56828	0.345	0.076	2.1947e-18	Cycling	G2e3
Eme1	2.40104e-22	0.282492	0.155	0.009	4.35284e-18	Cycling	Eme1
Ccne2	2.64591e-22	0.687138	0.291	0.054	4.79677e-18	Cycling	Ccne2
2021-09-10	3.79611e-22	0.646811	0.541	0.193	6.88197e-18	Cycling	2021-09-10
Prdx4	4.86094e-22	0.705128	0.777	0.437	8.81239e-18	Cycling	Prdx4
Pole2	6.80487e-22	0.294163	0.196	0.02	1.23366e-17	Cycling	Pole2
Ncapd2	8.41809e-22	0.302166	0.189	0.018	1.52612e-17	Cycling	Ncapd2
Reep4	1.14012e-21	0.630588	0.304	0.062	2.06692e-17	Cycling	Reep4
Cenpm	1.34908e-21	0.430643	0.25	0.038	2.44574e-17	Cycling	Cenpm
Foxm1	1.62145e-21	0.266954	0.155	0.01	2.93952e-17	Cycling	Foxm1
Dhfr	5.26328e-21	0.620469	0.426	0.127	9.54179e-17	Cycling	Dhfr
LOC679342	7.25569e-21	0.315169	0.182	0.018	1.31538e-16	Cycling	LOC679342
Ndc1	7.9046e-21	0.536898	0.378	0.099	1.43302e-16	Cycling	Ndc1
Rad18	1.59355e-20	0.595006	0.399	0.109	2.88894e-16	Cycling	Rad18
Cit	1.83483e-20	0.342406	0.176	0.017	3.32636e-16	Cycling	Cit
Kntc1	3.85765e-20	0.366047	0.209	0.028	6.99353e-16	Cycling	Kntc1
Chek2	8.53952e-20	0.276457	0.203	0.026	1.54813e-15	Cycling	Chek2
Calm2.1	9.51983e-20	0.714594	0.838	0.639	1.72585e-15	Cycling	Calm2.1
Clic1	1.22042e-19	0.547017	0.939	0.813	2.21249e-15	Cycling	Clic1
Ercc6l	2.0928e-19	0.350751	0.196	0.025	3.79403e-15	Cycling	Ercc6l
Trip13	2.36389e-19	0.404409	0.223	0.034	4.28549e-15	Cycling	Trip13
Mad2l1	5.99352e-19	0.309183	0.203	0.028	1.08657e-14	Cycling	Mad2l1
Dnajc9	6.21337e-19	0.544314	0.561	0.226	1.12642e-14	Cycling	Dnajc9
Mns1	1.48135e-18	0.260493	0.169	0.018	2.68553e-14	Cycling	Mns1
AABR07066944.1	1.54959e-18	0.396063	0.223	0.036	2.80924e-14	Cycling	AABR07066944.1
Pkmyt1	2.5479e-18	0.318989	0.155	0.015	4.61908e-14	Cycling	Pkmyt1
Kpnb1	2.95837e-18	0.648077	0.77	0.417	5.36323e-14	Cycling	Kpnb1
Hist1h1a	3.75033e-18	0.286649	0.155	0.015	6.79897e-14	Cycling	Hist1h1a
Hist1h2bo	9.44348e-18	0.313228	0.135	0.01	1.71201e-13	Cycling	Hist1h2bo
Gins1	1.04287e-17	0.355982	0.257	0.052	1.89062e-13	Cycling	Gins1
Depdc1b	1.05429e-17	0.252002	0.149	0.013	1.91132e-13	Cycling	Depdc1b
Smc3	1.08892e-17	0.564032	0.77	0.455	1.97411e-13	Cycling	Smc3
Anp32b	1.14481e-17	0.621637	0.736	0.434	2.07543e-13	Cycling	Anp32b
Pmf1	1.22107e-17	0.429752	0.385	0.115	2.21368e-13	Cycling	Pmf1
Lsm2	1.25162e-17	0.480754	0.405	0.127	2.26906e-13	Cycling	Lsm2
Psip1	1.79088e-17	0.555417	0.608	0.29	3.24669e-13	Cycling	Psip1
Timeless	3.44539e-17	0.542737	0.365	0.109	6.24614e-13	Cycling	Timeless
Nde1	3.82537e-17	0.536824	0.358	0.108	6.93502e-13	Cycling	Nde1
Cdc25c	5.25247e-17	0.326315	0.155	0.017	9.5222e-13	Cycling	Cdc25c
Cenpn	6.3365e-17	0.362113	0.223	0.04	1.14874e-12	Cycling	Cenpn
LOC361346	8.19344e-17	0.500966	0.419	0.142	1.48539e-12	Cycling	LOC361346
Hirip3	8.63055e-17	0.562266	0.439	0.158	1.56463e-12	Cycling	Hirip3
Cdc45	1.24439e-16	0.375123	0.257	0.055	2.25596e-12	Cycling	Cdc45
Wee1	2.37221e-16	0.447813	0.324	0.091	4.30057e-12	Cycling	Wee1
Bard1	2.65861e-16	0.312362	0.135	0.012	4.8198e-12	Cycling	Bard1
Selenoh	2.6977e-16	0.706399	0.662	0.387	4.89066e-12	Cycling	Selenoh
Cdc6	3.19909e-16	0.421219	0.203	0.035	5.79963e-12	Cycling	Cdc6
Rbm3	4.3073e-16	0.408881	0.912	0.789	7.8087e-12	Cycling	Rbm3
Hist1h1c	4.53548e-16	0.559472	0.372	0.12	8.22238e-12	Cycling	Hist1h1c
Dnmt1	7.35412e-16	0.629464	0.507	0.218	1.33323e-11	Cycling	Dnmt1
Lrrcc1	1.1989e-15	0.475905	0.405	0.141	2.17349e-11	Cycling	Lrrcc1
Terf1	1.41092e-15	0.435193	0.345	0.105	2.55787e-11	Cycling	Terf1
Cenpl	1.8195e-15	0.363975	0.257	0.058	3.29857e-11	Cycling	Cenpl
Cdca4	2.15439e-15	0.433127	0.318	0.092	3.90569e-11	Cycling	Cdca4
Gins4	2.91787e-15	0.428541	0.345	0.106	5.28981e-11	Cycling	Gins4
Pola1	3.07393e-15	0.572088	0.399	0.142	5.57273e-11	Cycling	Pola1
Nsd2	3.75666e-15	0.3928	0.264	0.064	6.81045e-11	Cycling	Nsd2
Csrp2	4.1412e-15	0.493762	0.507	0.211	7.50758e-11	Cycling	Csrp2
Brca2	4.24421e-15	0.446104	0.284	0.076	7.69432e-11	Cycling	Brca2
Mms22l	7.43458e-15	0.297146	0.169	0.026	1.34781e-10	Cycling	Mms22l
Suv39h1l1	7.66293e-15	0.293747	0.209	0.04	1.38921e-10	Cycling	Suv39h1l1
Tipinl1	8.95447e-15	0.524019	0.608	0.314	1.62336e-10	Cycling	Tipinl1
RGD1306227	1.04741e-14	0.254011	0.196	0.036	1.89885e-10	Cycling	RGD1306227
Snrpd1	1.33925e-14	0.521556	0.838	0.623	2.42792e-10	Cycling	Snrpd1
Cep135	1.33968e-14	0.397455	0.291	0.082	2.42871e-10	Cycling	Cep135
Ccne1	1.34782e-14	0.323847	0.122	0.011	2.44345e-10	Cycling	Ccne1
Myh10	1.40831e-14	0.437661	0.439	0.165	2.55312e-10	Cycling	Myh10
Rad21	1.50724e-14	0.575905	0.635	0.349	2.73248e-10	Cycling	Rad21
Dbf4	1.54627e-14	0.331023	0.189	0.035	2.80323e-10	Cycling	Dbf4
Nup210	2.1991e-14	0.428973	0.453	0.172	3.98674e-10	Cycling	Nup210
Orc6	2.91854e-14	0.359609	0.284	0.077	5.29102e-10	Cycling	Orc6
Nav2	3.13675e-14	0.301044	0.155	0.022	5.68661e-10	Cycling	Nav2
Xpo1	3.62404e-14	0.476994	0.507	0.224	6.57002e-10	Cycling	Xpo1
Rpa3	6.76517e-14	0.5382	0.682	0.41	1.22646e-09	Cycling	Rpa3
Nap1l1	6.76872e-14	0.538318	0.777	0.545	1.2271e-09	Cycling	Nap1l1
Mcm7	7.6053e-14	0.527398	0.378	0.14	1.37876e-09	Cycling	Mcm7
Cbx5	8.13877e-14	0.465034	0.493	0.218	1.47548e-09	Cycling	Cbx5
Dtymk	9.88582e-14	0.604012	0.527	0.255	1.7922e-09	Cycling	Dtymk
AABR07021955.1	1.1228e-13	0.383973	0.243	0.06	2.03553e-09	Cycling	AABR07021955.1
Clspn	1.87742e-13	0.272492	0.101	0.008	3.40358e-09	Cycling	Clspn
Banf1	1.95884e-13	0.424414	0.764	0.458	3.55119e-09	Cycling	Banf1
Pcna	2.90809e-13	0.909105	0.601	0.378	5.27207e-09	Cycling	Pcna
Ssrp1	3.63058e-13	0.49174	0.676	0.389	6.58187e-09	Cycling	Ssrp1
Skp2	4.69257e-13	0.32162	0.182	0.036	8.50716e-09	Cycling	Skp2
Aaas	5.96309e-13	0.272771	0.189	0.038	1.08105e-08	Cycling	Aaas
Srsf2	7.52505e-13	0.507578	0.885	0.645	1.36422e-08	Cycling	Srsf2
Cenpu	8.04862e-13	0.25433	0.122	0.015	1.45913e-08	Cycling	Cenpu
Vrk1	8.41307e-13	0.41269	0.318	0.108	1.52521e-08	Cycling	Vrk1
Srsf3	2.62003e-12	0.44033	0.905	0.756	4.74985e-08	Cycling	Srsf3
Lsm3	3.37382e-12	0.433971	0.75	0.498	6.11639e-08	Cycling	Lsm3
Ckap4	4.17003e-12	0.460675	0.554	0.27	7.55984e-08	Cycling	Ckap4
Srsf7	4.20497e-12	0.459112	0.696	0.429	7.62318e-08	Cycling	Srsf7
Rpa2	5.00304e-12	0.465711	0.331	0.121	9.07001e-08	Cycling	Rpa2
Fen1	5.53399e-12	0.363386	0.365	0.138	1.00326e-07	Cycling	Fen1
RGD1560010	5.71017e-12	0.260888	0.149	0.026	1.0352e-07	Cycling	RGD1560010
Ywhah	6.10264e-12	0.449761	0.635	0.364	1.10635e-07	Cycling	Ywhah
Scoc	8.20247e-12	0.410437	0.608	0.314	1.48702e-07	Cycling	Scoc
Lig1	1.04673e-11	0.48549	0.426	0.191	1.89761e-07	Cycling	Lig1
Dbi	1.05718e-11	0.415918	0.77	0.529	1.91657e-07	Cycling	Dbi
Cenpj	1.17755e-11	0.462436	0.284	0.095	2.13478e-07	Cycling	Cenpj
Ccdc18	1.62175e-11	0.311589	0.223	0.06	2.94008e-07	Cycling	Ccdc18
Hat1	1.65919e-11	0.443234	0.514	0.251	3.00794e-07	Cycling	Hat1
Calm3	2.38464e-11	0.439026	0.588	0.328	4.32312e-07	Cycling	Calm3
Nrm	2.41093e-11	0.36484	0.257	0.078	4.37078e-07	Cycling	Nrm
Exosc8	2.89887e-11	0.379364	0.48	0.23	5.25537e-07	Cycling	Exosc8
E2f2	3.12015e-11	0.289214	0.162	0.034	5.65652e-07	Cycling	E2f2
Hmgb1	3.16549e-11	0.370198	0.547	0.274	5.73871e-07	Cycling	Hmgb1
Fam83d	4.75801e-11	0.315978	0.243	0.072	8.6258e-07	Cycling	Fam83d
Hdgf	5.57736e-11	0.420775	0.412	0.184	1.01112e-06	Cycling	Hdgf
AABR07035218.1	6.40462e-11	0.400224	0.588	0.317	1.16109e-06	Cycling	AABR07035218.1
2021-09-07	6.9023e-11	0.348756	0.953	0.828	1.25132e-06	Cycling	2021-09-07
Cep57l1	6.95585e-11	0.402381	0.257	0.082	1.26103e-06	Cycling	Cep57l1
Rfc3	7.00075e-11	0.393145	0.338	0.129	1.26917e-06	Cycling	Rfc3
LOC102546716	1.06301e-10	0.297698	0.243	0.076	1.92713e-06	Cycling	LOC102546716
Acyp1	2.61955e-10	0.30528	0.351	0.138	4.74898e-06	Cycling	Acyp1
Ppial4d	3.47632e-10	0.385296	0.878	0.7	6.30222e-06	Cycling	Ppial4d
Vim	3.67524e-10	0.306119	0.966	0.957	6.66284e-06	Cycling	Vim
Mcm3	4.19493e-10	0.416355	0.284	0.103	7.60499e-06	Cycling	Mcm3
Ptms	4.21411e-10	0.464133	0.818	0.615	7.63976e-06	Cycling	Ptms
Topbp1	4.64876e-10	0.307982	0.209	0.06	8.42773e-06	Cycling	Topbp1
Car21	4.91324e-10	0.432943	0.723	0.461	8.90721e-06	Cycling	Car2
Donson	6.02027e-10	0.280867	0.155	0.035	1.09141e-05	Cycling	Donson
Odc1	6.56888e-10	0.360401	0.385	0.17	1.19087e-05	Cycling	Odc1
Rbbp7	7.10236e-10	0.487339	0.574	0.346	1.28759e-05	Cycling	Rbbp7
Jpt1	7.67012e-10	0.603158	0.791	0.646	1.39052e-05	Cycling	Jpt1
Nop58	8.40912e-10	0.366661	0.574	0.33	1.52449e-05	Cycling	Nop58
Tmem129	8.49469e-10	0.268509	0.196	0.055	1.54e-05	Cycling	Tmem129
Stag2	8.76877e-10	0.40453	0.709	0.489	1.58969e-05	Cycling	Stag2
Rbl1	9.28922e-10	0.292683	0.128	0.025	1.68404e-05	Cycling	Rbl1
Nxt1	1.00275e-09	0.299012	0.399	0.174	1.81789e-05	Cycling	Nxt1
Nono	1.04833e-09	0.395505	0.804	0.606	1.90051e-05	Cycling	Nono
Myef2	1.34801e-09	0.289143	0.23	0.074	2.44381e-05	Cycling	Myef2
Cchcr1	1.42441e-09	0.279553	0.162	0.039	2.58231e-05	Cycling	Cchcr1
Mcm5	1.95397e-09	0.269345	0.209	0.063	3.54235e-05	Cycling	Mcm5
Mcm4	2.29091e-09	0.330272	0.331	0.135	4.15319e-05	Cycling	Mcm4
Tyms	2.30397e-09	0.393239	0.264	0.097	4.17687e-05	Cycling	Tyms
Itgb3bp	2.44913e-09	0.4306	0.324	0.135	4.44002e-05	Cycling	Itgb3bp
Arl6ip6	2.5019e-09	0.424882	0.385	0.181	4.5357e-05	Cycling	Arl6ip6
Cd1091	2.87934e-09	0.334102	0.453	0.212	5.21995e-05	Cycling	Cd109
Dpy30	3.14076e-09	0.355145	0.628	0.378	5.69389e-05	Cycling	Dpy30
Nop56	3.82817e-09	0.387535	0.486	0.256	6.9401e-05	Cycling	Nop56
Cep57	4.22596e-09	0.288641	0.277	0.105	7.66125e-05	Cycling	Cep57
H2afv	4.42437e-09	0.470332	0.635	0.442	8.02094e-05	Cycling	H2afv
Bub3	4.80485e-09	0.371729	0.439	0.227	8.71072e-05	Cycling	Bub3
Rif1	4.87896e-09	0.48205	0.635	0.396	8.84506e-05	Cycling	Rif1
Nedd1	5.0473e-09	0.330633	0.23	0.078	9.15025e-05	Cycling	Nedd1
Sptssa	5.14235e-09	0.369929	0.703	0.449	9.32257e-05	Cycling	Sptssa
Hnrnpa2b1	6.10595e-09	0.325133	0.892	0.732	0.000110695	Cycling	Hnrnpa2b1
Ing2	7.95733e-09	0.32101	0.345	0.153	0.000144258	Cycling	Ing2
Odf2	8.21592e-09	0.320309	0.351	0.159	0.000148946	Cycling	Odf2
Tecr	9.63709e-09	0.370022	0.581	0.346	0.000174711	Cycling	Tecr
Hp1bp3	1.01804e-08	0.375233	0.73	0.515	0.00018456	Cycling	Hp1bp3
Rfc1	1.7704e-08	0.356793	0.541	0.306	0.000320956	Cycling	Rfc1
Rbmx2	2.04457e-08	0.34658	0.392	0.194	0.00037066	Cycling	Rbmx2
AABR07064873.1	2.06246e-08	0.426022	0.649	0.43	0.000373903	Cycling	AABR07064873.1
Pfn1	2.09447e-08	0.275098	0.919	0.772	0.000379706	Cycling	Pfn1
Tent4a	2.58877e-08	0.285574	0.264	0.103	0.000469319	Cycling	Tent4a
Ndufaf6	3.00144e-08	0.359671	0.216	0.076	0.000544131	Cycling	Ndufaf6
Nudt5	3.40738e-08	0.260925	0.527	0.286	0.000617723	Cycling	Nudt5
Cep89	3.41918e-08	0.521033	0.196	0.066	0.000619863	Cycling	Cep89
Ranbp1	3.50218e-08	0.389515	0.588	0.383	0.000634911	Cycling	Ranbp1
Rnf168	3.56702e-08	0.350954	0.27	0.109	0.000646665	Cycling	Rnf168
Siva1	3.68892e-08	0.365553	0.351	0.166	0.000668765	Cycling	Siva1
Ilf2	3.69698e-08	0.332908	0.466	0.25	0.000670225	Cycling	Ilf2
Rnps1	4.12446e-08	0.383741	0.595	0.377	0.000747724	Cycling	Rnps1
Tcerg1	4.1411e-08	0.329451	0.601	0.365	0.00075074	Cycling	Tcerg1
Gmfg1	4.30176e-08	0.312181	0.818	0.608	0.000779866	Cycling	Gmfg
Smarcc1	6.34987e-08	0.349055	0.318	0.143	0.00115117	Cycling	Smarcc1
Lsm5	7.06514e-08	0.341312	0.682	0.464	0.00128084	Cycling	Lsm5
Taf1d	8.88589e-08	0.392226	0.581	0.359	0.00161092	Cycling	Taf1d
Gng2	9.18799e-08	0.29226	0.345	0.157	0.00166569	Cycling	Gng2
H3f3a	9.39767e-08	0.268704	0.959	0.945	0.0017037	Cycling	H3f3a
Nudcd2	9.66945e-08	0.288049	0.412	0.209	0.00175298	Cycling	Nudcd2
Ssna1	9.90692e-08	0.300091	0.351	0.169	0.00179603	Cycling	Ssna1
Mcm2	1.16171e-07	0.262935	0.25	0.099	0.00210607	Cycling	Mcm2
Ugdh	1.24054e-07	0.314167	0.365	0.183	0.00224897	Cycling	Ugdh
Smc6	1.27274e-07	0.44926	0.574	0.374	0.00230734	Cycling	Smc6
U2af1	1.40705e-07	0.297994	0.703	0.51	0.00255085	Cycling	U2af1
Oxct1	1.65423e-07	0.326388	0.432	0.235	0.00299896	Cycling	Oxct1
Hsd17b12	2.50567e-07	0.259278	0.405	0.204	0.00454253	Cycling	Hsd17b12
Cmpk1	2.513e-07	0.340526	0.595	0.377	0.00455583	Cycling	Cmpk1
Rad50	2.58217e-07	0.37656	0.412	0.225	0.00468122	Cycling	Rad50
Cntrl	2.63974e-07	0.284755	0.284	0.124	0.00478559	Cycling	Cntrl
Nup88	2.66165e-07	0.284757	0.331	0.159	0.00482531	Cycling	Nup88
Srrm1	2.72643e-07	0.310594	0.784	0.594	0.00494274	Cycling	Srrm1
Emp3	2.99861e-07	0.361718	0.818	0.641	0.00543618	Cycling	Emp3
Fopnl	3.07816e-07	0.265937	0.378	0.193	0.0055804	Cycling	Fopnl
LOC103689931	3.24115e-07	0.388497	0.696	0.51	0.00587589	Cycling	LOC103689931
Hnrnpa1	3.33033e-07	0.262419	0.878	0.767	0.00603756	Cycling	Hnrnpa1
Rdm1	3.39123e-07	0.277688	0.52	0.314	0.00614796	Cycling	Rdm1
Fancb	3.73555e-07	0.278712	0.108	0.025	0.00677219	Cycling	Fancb
Tipin	3.7382e-07	0.264607	0.223	0.086	0.00677698	Cycling	Tipin
Magoh	3.95599e-07	0.274745	0.811	0.615	0.00717182	Cycling	Magoh
Cdkn1b	4.00592e-07	0.305562	0.561	0.353	0.00726233	Cycling	Cdkn1b
Lpl1	4.4287e-07	0.262843	0.764	0.501	0.00802879	Cycling	Lpl
Nup205	4.89565e-07	0.294394	0.216	0.084	0.00887533	Cycling	Nup205
Mettl9	5.10529e-07	0.278574	0.574	0.353	0.00925538	Cycling	Mettl9
Ndufa11	5.91883e-07	0.322134	0.75	0.564	0.0107303	Cycling	Ndufa11
Fhod1	6.37248e-07	0.30951	0.331	0.16	0.0115527	Cycling	Fhod1
Dazap1	6.54381e-07	0.26683	0.196	0.073	0.0118633	Cycling	Dazap1
Ppil1	7.32493e-07	0.277215	0.351	0.177	0.0132794	Cycling	Ppil1
Hnrnpf	7.40053e-07	0.259224	0.899	0.819	0.0134164	Cycling	Hnrnpf
Nfyb	8.53693e-07	0.285275	0.453	0.263	0.0154766	Cycling	Nfyb
Naa40	9.22698e-07	0.251383	0.128	0.036	0.0167276	Cycling	Naa40
Casp8ap2	1.08416e-06	0.366764	0.507	0.326	0.0196547	Cycling	Casp8ap2
Snrpa1	1.15491e-06	0.290418	0.493	0.291	0.0209374	Cycling	Snrpa1
Hdgfl2	1.22607e-06	0.296726	0.318	0.157	0.0222275	Cycling	Hdgfl2
Txndc12	1.2482e-06	0.299291	0.669	0.478	0.0226287	Cycling	Txndc12
LOC100363502	1.30244e-06	0.305138	0.757	0.595	0.0236119	Cycling	LOC100363502
Atp5if1	1.39697e-06	0.253112	0.791	0.582	0.0253257	Cycling	Atp5if1
LOC102547056	1.49251e-06	0.266252	0.378	0.196	0.0270577	Cycling	LOC102547056
Slbp	1.49993e-06	0.333384	0.345	0.18	0.0271922	Cycling	Slbp
Pcm1	1.50028e-06	0.280934	0.649	0.458	0.0271985	Cycling	Pcm1
Ccng2	1.56781e-06	0.377517	0.318	0.163	0.0284227	Cycling	Ccng2
Mrps12	1.68862e-06	0.273047	0.372	0.198	0.0306131	Cycling	Mrps12
Ssr1	1.78407e-06	0.289522	0.5	0.301	0.0323434	Cycling	Ssr1
Hltf	1.81616e-06	0.332745	0.331	0.17	0.0329251	Cycling	Hltf
Sae1	1.89082e-06	0.268938	0.446	0.256	0.0342787	Cycling	Sae1
Cdk2ap1	2.36182e-06	0.319462	0.547	0.342	0.0428175	Cycling	Cdk2ap1
Cbx1	2.48589e-06	0.256142	0.358	0.184	0.0450667	Cycling	Cbx1
Pnrc2	2.82725e-06	0.29564	0.709	0.498	0.0512552	Cycling	Pnrc2
Tra2b	2.93796e-06	0.337223	0.709	0.52	0.0532622	Cycling	Tra2b
Trappc1	2.99466e-06	0.310668	0.574	0.37	0.0542902	Cycling	Trappc1
Mrpl14	3.23523e-06	0.274848	0.507	0.321	0.0586515	Cycling	Mrpl14
Mtfr2	3.29032e-06	0.303255	0.676	0.471	0.0596502	Cycling	Mtfr2
Rbbp4	3.35509e-06	0.393642	0.568	0.413	0.0608244	Cycling	Rbbp4
Snrpg	3.95519e-06	0.267988	0.439	0.262	0.0717036	Cycling	Snrpg
Fkbp2	4.06005e-06	0.30993	0.689	0.49	0.0736047	Cycling	Fkbp2
Hnrnpd	4.13552e-06	0.33201	0.608	0.411	0.0749729	Cycling	Hnrnpd
Tpm3	4.55687e-06	0.274938	0.811	0.636	0.0826115	Cycling	Tpm3
Pcp4l1	4.56941e-06	0.282413	0.318	0.157	0.0828388	Cycling	Pcp4l1
Ak2	4.597e-06	0.356275	0.412	0.242	0.083339	Cycling	Ak2
Pold3	4.82149e-06	0.337436	0.311	0.163	0.0874087	Cycling	Pold3
Srsf10	5.06928e-06	0.257133	0.304	0.152	0.091901	Cycling	Srsf10
Pa2g4	5.59973e-06	0.277656	0.412	0.241	0.101518	Cycling	Pa2g4
Tpm4	7.32048e-06	0.298696	0.554	0.37	0.132713	Cycling	Tpm4
Thoc3	7.92174e-06	0.267391	0.264	0.127	0.143613	Cycling	Thoc3
Supt16h	8.37224e-06	0.367899	0.466	0.311	0.15178	Cycling	Supt16h
Hnrnpr	8.78887e-06	0.322831	0.466	0.289	0.159333	Cycling	Hnrnpr
Rabggtb	8.84202e-06	0.311723	0.622	0.448	0.160297	Cycling	Rabggtb
Polr2b	9.21426e-06	0.277346	0.365	0.205	0.167045	Cycling	Polr2b
Slc29a12	9.61502e-06	0.252049	0.885	0.727	0.174311	Cycling	Slc29a1
Ripply3	9.92182e-06	0.266246	0.73	0.542	0.179873	Cycling	Ripply3
Ipo7	1.02915e-05	0.294973	0.392	0.231	0.186574	Cycling	Ipo7
Ndufa12	1.07838e-05	0.316339	0.547	0.367	0.195499	Cycling	Ndufa12
Hspa14	1.09215e-05	0.266884	0.345	0.186	0.197996	Cycling	Hspa14
Hnrnpu	1.23833e-05	0.260327	0.838	0.645	0.224496	Cycling	Hnrnpu
Mcm6	1.26165e-05	0.32319	0.338	0.19	0.228725	Cycling	Mcm6
Stard7	1.53419e-05	0.309039	0.236	0.114	0.278134	Cycling	Stard7
Ttc9c	1.60561e-05	0.258632	0.216	0.097	0.29108	Cycling	Ttc9c
Ctcf	2.11826e-05	0.257169	0.534	0.367	0.384019	Cycling	Ctcf
Nudt2	2.45681e-05	0.269662	0.419	0.263	0.445395	Cycling	Nudt2
Aldh7a1	2.72033e-05	0.252627	0.439	0.268	0.493168	Cycling	Aldh7a1
Rab8b	2.86646e-05	0.305271	0.561	0.378	0.519661	Cycling	Rab8b
Col15a11	2.91435e-05	0.260706	0.588	0.399	0.528343	Cycling	Col15a1
LOC100910754	3.17198e-05	0.25321	0.176	0.074	0.575049	Cycling	LOC100910754
Paxip1	3.26585e-05	0.29306	0.169	0.071	0.592066	Cycling	Paxip1
Haus7	3.60774e-05	0.283922	0.196	0.088	0.654047	Cycling	Haus7
Hnrnph3	3.78438e-05	0.282202	0.365	0.216	0.686071	Cycling	Hnrnph3
LOC100911295	3.90847e-05	0.264671	0.615	0.443	0.708566	Cycling	LOC100911295
Baz1b	4.18169e-05	0.252215	0.426	0.27	0.758098	Cycling	Baz1b
Tsen34l1	4.41363e-05	0.258254	0.419	0.261	0.800147	Cycling	Tsen34l1
Exosc7	4.72212e-05	0.252331	0.405	0.251	0.856073	Cycling	Exosc7
Thoc7	4.74258e-05	0.2632	0.588	0.411	0.859783	Cycling	Thoc7
Cbx3	5.89672e-05	0.283362	0.52	0.362	1	Cycling	Cbx3
Sf3b2	8.51296e-05	0.26148	0.791	0.665	1	Cycling	Sf3b2
Eloc	0.000104851	0.252268	0.703	0.505	1	Cycling	Eloc
Mapre1	0.000116238	0.258246	0.709	0.535	1	Cycling	Mapre1
Atm	0.000165201	0.26592	0.358	0.217	1	Cycling	Atm
Cpsf2	0.000268191	0.259013	0.378	0.252	1	Cycling	Cpsf2
Slf1	0.000282799	0.257043	0.27	0.156	1	Cycling	Slf1
Cep290	0.000308824	0.281153	0.331	0.198	1	Cycling	Cep290
Hnrnpa3	0.000346699	0.266685	0.547	0.4	1	Cycling	Hnrnpa3
Ube2a	0.000499056	0.265963	0.527	0.378	1	Cycling	Ube2a
Stag1	0.000636571	0.346438	0.419	0.293	1	Cycling	Stag1
Cr1l	0.000699006	0.250189	0.568	0.42	1	Cycling	Cr1l
Cstf2	0.000739191	0.254213	0.196	0.104	1	Cycling	Cstf2
Trim28	0.00088015	0.258309	0.338	0.222	1	Cycling	Trim28
Idh2	0.0010626	0.274456	0.473	0.346	1	Cycling	Idh2
Nenf	0.00119195	0.27844	0.399	0.283	1	Cycling	Nenf
Slc6a2	1.21268e-68	0.636243	0.337	0.002	2.19846e-64	Pulmonary Venous	Slc6a2
Cdh2	9.42439e-64	0.882079	0.558	0.043	1.70855e-59	Pulmonary Venous	Cdh2
Calml4	1.19163e-59	0.92998	0.516	0.039	2.16031e-55	Pulmonary Venous	Calml4
Ackr3	4.9717e-57	1.49045	0.895	0.228	9.0132e-53	Pulmonary Venous	Ackr3
Efemp1	3.00858e-55	0.599714	0.4	0.019	5.45425e-51	Pulmonary Venous	Efemp1
Cpe	4.98766e-54	1.19427	0.526	0.051	9.04212e-50	Pulmonary Venous	Cpe
Adgrg6	1.82668e-53	1.30812	0.853	0.171	3.31158e-49	Pulmonary Venous	Adgrg6
Car8	2.82807e-53	1.04897	0.695	0.11	5.127e-49	Pulmonary Venous	Car8
C1qtnf7	2.78616e-51	0.994324	0.589	0.073	5.05103e-47	Pulmonary Venous	C1qtnf7
Net1	1.20778e-50	1.36053	0.789	0.18	2.18958e-46	Pulmonary Venous	Net1
Rgs5	2.36334e-49	1.38579	0.8	0.189	4.28449e-45	Pulmonary Venous	Rgs5
Fbln2	2.66784e-49	0.914058	0.874	0.167	4.83652e-45	Pulmonary Venous	Fbln2
Duoxa1	1.74877e-48	0.265059	0.263	0.004	3.17035e-44	Pulmonary Venous	Duoxa1
Sulf1	1.89722e-48	1.27051	0.705	0.127	3.43946e-44	Pulmonary Venous	Sulf1
Abi3bp	2.06909e-48	1.45791	0.779	0.174	3.75105e-44	Pulmonary Venous	Abi3bp
Procr	2.92142e-45	1.1153	0.821	0.191	5.29624e-41	Pulmonary Venous	Procr
Map2	6.39555e-45	0.914776	0.474	0.05	1.15945e-40	Pulmonary Venous	Map2
Gchfr	8.59966e-45	1.00307	0.674	0.124	1.55903e-40	Pulmonary Venous	Gchfr
LOC100911486	1.3826e-43	0.597693	0.442	0.042	2.50652e-39	Pulmonary Venous	LOC100911486
Vegfc	1.52905e-43	1.16142	0.747	0.173	2.77202e-39	Pulmonary Venous	Vegfc
Nr2f2	1.05695e-39	0.834977	0.547	0.08	1.91615e-35	Pulmonary Venous	Nr2f2
Nuak1	3.56313e-38	0.768125	0.653	0.119	6.4596e-34	Pulmonary Venous	Nuak1
Jam2	1.9359e-37	1.21358	0.916	0.387	3.50959e-33	Pulmonary Venous	Jam2
Prss23	1.24129e-36	1.22056	0.874	0.376	2.25033e-32	Pulmonary Venous	Prss23
Tmem252	1.84311e-36	1.08634	0.874	0.311	3.34137e-32	Pulmonary Venous	Tmem252
Clu	5.7461e-36	1.58452	0.558	0.104	1.04171e-31	Pulmonary Venous	Clu
Il1r1	7.785e-36	0.562919	0.4	0.043	1.41134e-31	Pulmonary Venous	Il1r1
Tf	1.84878e-35	0.882643	0.632	0.135	3.35164e-31	Pulmonary Venous	Tf
Eln	2.07411e-35	1.53997	0.947	0.487	3.76016e-31	Pulmonary Venous	Eln
Csrp21	1.84487e-34	1.00167	0.737	0.204	3.34456e-30	Pulmonary Venous	Csrp2
Anxa3	8.12368e-34	1.14851	0.968	0.542	1.47274e-29	Pulmonary Venous	Anxa3
Nell2	8.58141e-34	0.355355	0.232	0.01	1.55572e-29	Pulmonary Venous	Nell2
Tll1	2.22669e-33	0.305864	0.242	0.012	4.03677e-29	Pulmonary Venous	Tll1
Hs3st1	2.99106e-33	0.675114	0.4	0.05	5.4225e-29	Pulmonary Venous	Hs3st1
Htr2b	1.98524e-31	0.412481	0.232	0.012	3.59905e-27	Pulmonary Venous	Htr2b
Arhgdib	7.42471e-31	1.04222	0.758	0.257	1.34603e-26	Pulmonary Venous	Arhgdib
Pam1	1.40833e-30	1.06953	0.832	0.333	2.55316e-26	Pulmonary Venous	Pam
Igfbp5	2.71944e-30	1.33199	0.853	0.415	4.93008e-26	Pulmonary Venous	Igfbp5
Vwf	5.02396e-30	1.04874	0.926	0.495	9.10793e-26	Pulmonary Venous	Vwf
Vcam1	1.52895e-28	0.761901	0.442	0.075	2.77184e-24	Pulmonary Venous	Vcam1
RGD1564664	2.24091e-28	0.778808	0.537	0.116	4.06255e-24	Pulmonary Venous	RGD1564664
Tmem176a1	6.45513e-28	0.86233	0.747	0.244	1.17025e-23	Pulmonary Venous	Tmem176a
Col14a1	1.60422e-27	0.880502	0.411	0.064	2.90829e-23	Pulmonary Venous	Col14a1
Il33	2.27358e-27	1.03635	0.958	0.643	4.12177e-23	Pulmonary Venous	Il33
Rgs2	1.2439e-25	0.846929	0.621	0.178	2.25506e-21	Pulmonary Venous	Rgs2
Insr	1.46707e-25	0.27736	0.274	0.027	2.65964e-21	Pulmonary Venous	Insr
AABR07047872.1	1.45351e-24	0.383329	0.221	0.017	2.63506e-20	Pulmonary Venous	AABR07047872.1
Ddit4	7.24168e-24	0.616716	0.421	0.081	1.31284e-19	Pulmonary Venous	Ddit4
Lims2	8.99583e-24	0.367233	0.389	0.067	1.63085e-19	Pulmonary Venous	Lims2
Itgb4	9.57661e-24	0.386597	0.263	0.029	1.73614e-19	Pulmonary Venous	Itgb4
Bhlhe22	1.15958e-23	0.276262	0.126	0.002	2.10219e-19	Pulmonary Venous	Bhlhe22
Tmem176b1	1.48265e-23	0.769834	0.768	0.307	2.68789e-19	Pulmonary Venous	Tmem176b
Ednrb1	2.88734e-23	0.813342	0.853	0.39	5.23447e-19	Pulmonary Venous	Ednrb
Chn2	3.91055e-23	0.463743	0.305	0.042	7.08944e-19	Pulmonary Venous	Chn2
Tgm2	6.80363e-23	0.832176	0.842	0.446	1.23343e-18	Pulmonary Venous	Tgm2
Pcdh7	1.39336e-22	0.359725	0.232	0.022	2.52602e-18	Pulmonary Venous	Pcdh7
Aqp1	4.70081e-22	0.882159	0.905	0.702	8.52211e-18	Pulmonary Venous	Aqp1
Vldlr	1.48436e-21	0.450792	0.337	0.056	2.69099e-17	Pulmonary Venous	Vldlr
Mras	2.90034e-21	0.549839	0.558	0.159	5.25803e-17	Pulmonary Venous	Mras
Rab27a	1.91969e-20	0.485831	0.379	0.077	3.48021e-16	Pulmonary Venous	Rab27a
Arl4d	2.11462e-20	0.3132	0.358	0.063	3.83359e-16	Pulmonary Venous	Arl4d
Pdlim3	3.96204e-20	0.787329	0.832	0.446	7.18279e-16	Pulmonary Venous	Pdlim3
Ifitm3	9.13729e-20	0.735768	0.937	0.651	1.6565e-15	Pulmonary Venous	Ifitm3
Adam15	4.05815e-19	0.58594	0.632	0.208	7.35701e-15	Pulmonary Venous	Adam15
Fam107a	6.32775e-19	0.363488	0.263	0.038	1.14716e-14	Pulmonary Venous	Fam107a
Dll1	9.17788e-19	0.475356	0.358	0.075	1.66386e-14	Pulmonary Venous	Dll1
Fbln5	1.21162e-18	0.835998	0.705	0.276	2.19655e-14	Pulmonary Venous	Fbln5
Ptk2b	1.45662e-18	0.488577	0.274	0.043	2.6407e-14	Pulmonary Venous	Ptk2b
RGD1309104	1.73659e-18	0.589071	0.484	0.136	3.14826e-14	Pulmonary Venous	RGD1309104
Plxdc2	3.30446e-18	0.444165	0.389	0.088	5.99066e-14	Pulmonary Venous	Plxdc2
St3gal4	4.8321e-18	0.544301	0.568	0.185	8.76011e-14	Pulmonary Venous	St3gal4
Dhh	7.14536e-18	0.412799	0.4	0.094	1.29538e-13	Pulmonary Venous	Dhh
Uap1	5.81119e-17	0.445316	0.421	0.109	1.05351e-12	Pulmonary Venous	Uap1
Tspyl4	5.99573e-17	0.281844	0.305	0.057	1.08697e-12	Pulmonary Venous	Tspyl4
Nrp2	6.66857e-17	0.269305	0.4	0.091	1.20895e-12	Pulmonary Venous	Nrp2
LOC100910270	7.24446e-17	0.969089	0.432	0.121	1.31335e-12	Pulmonary Venous	LOC100910270
Cadm1	8.19868e-17	0.465959	0.537	0.165	1.48634e-12	Pulmonary Venous	Cadm1
Ltbp1	9.22002e-17	0.814566	0.768	0.456	1.6715e-12	Pulmonary Venous	Ltbp1
LOC103689922	1.38876e-16	0.817436	0.768	0.459	2.51769e-12	Pulmonary Venous	LOC103689922
Icam1	3.04606e-16	0.419186	0.411	0.106	5.5222e-12	Pulmonary Venous	Icam1
Cyp7b1	3.80485e-16	0.42295	0.316	0.064	6.89781e-12	Pulmonary Venous	Cyp7b1
Vsir	7.95629e-16	0.567688	0.632	0.246	1.4424e-11	Pulmonary Venous	Vsir
Zfpm2	5.51484e-15	0.299612	0.232	0.038	9.99785e-11	Pulmonary Venous	Zfpm2
Bgn	8.7171e-15	0.480191	0.558	0.196	1.58032e-10	Pulmonary Venous	Bgn
AABR07027306.1	9.71879e-15	0.25388	0.274	0.053	1.76192e-10	Pulmonary Venous	AABR07027306.1
Mal2	1.11513e-14	0.34295	0.263	0.051	2.02162e-10	Pulmonary Venous	Mal2
Rflnb	2.12143e-14	0.572244	0.516	0.198	3.84595e-10	Pulmonary Venous	Rflnb
Chn1	3.13375e-14	0.317405	0.295	0.064	5.68117e-10	Pulmonary Venous	Chn1
Foxo1	5.34605e-14	0.477457	0.505	0.182	9.69186e-10	Pulmonary Venous	Foxo1
Map1b	6.15007e-14	0.600048	0.537	0.208	1.11495e-09	Pulmonary Venous	Map1b
Ptprj	6.23102e-14	0.356467	0.358	0.093	1.12962e-09	Pulmonary Venous	Ptprj
Tsc22d3	6.33313e-14	0.637546	0.758	0.429	1.14813e-09	Pulmonary Venous	Tsc22d3
Amigo21	6.62871e-14	0.608711	0.579	0.233	1.20172e-09	Pulmonary Venous	Amigo2
Mmp2	9.28206e-14	0.52534	0.653	0.283	1.68275e-09	Pulmonary Venous	Mmp2
Filip1l	1.14042e-13	0.635312	0.674	0.339	2.06747e-09	Pulmonary Venous	Filip1l
Meox2	1.15487e-13	0.350806	0.316	0.074	2.09366e-09	Pulmonary Venous	Meox2
Lepr	2.11142e-13	0.335169	0.211	0.036	3.8278e-09	Pulmonary Venous	Lepr
Anxa2	4.38215e-13	0.503883	0.905	0.663	7.94439e-09	Pulmonary Venous	Anxa2
Srgn1	4.81133e-13	0.447379	0.937	0.76	8.72245e-09	Pulmonary Venous	Srgn
AABR07025295.1	4.97811e-13	0.383011	0.295	0.07	9.02482e-09	Pulmonary Venous	AABR07025295.1
Man2a1	5.13237e-13	0.574547	0.758	0.43	9.30448e-09	Pulmonary Venous	Man2a1
Fbn1	7.29557e-13	0.581202	0.632	0.284	1.32261e-08	Pulmonary Venous	Fbn1
Cdc42ep3	9.49956e-13	0.575646	0.568	0.241	1.72217e-08	Pulmonary Venous	Cdc42ep3
Specc1	1.51848e-12	0.341586	0.432	0.138	2.75285e-08	Pulmonary Venous	Specc1
Ifitm2	2.06678e-12	0.485151	0.979	0.819	3.74687e-08	Pulmonary Venous	Ifitm2
Tspan8	2.27692e-12	0.946774	0.789	0.673	4.12782e-08	Pulmonary Venous	Tspan8
Susd4	2.90051e-12	0.35377	0.211	0.04	5.25834e-08	Pulmonary Venous	Susd4
Rps27	3.01036e-12	0.34	1	0.992	5.45748e-08	Pulmonary Venous	Rps27
Wbp1l	3.4291e-12	0.474388	0.6	0.258	6.21662e-08	Pulmonary Venous	Wbp1l
Dsc2	5.48563e-12	0.300319	0.211	0.04	9.94491e-08	Pulmonary Venous	Dsc2
Tpt1	6.40273e-12	0.333593	1	0.987	1.16075e-07	Pulmonary Venous	Tpt1
Cox6c	9.16457e-12	0.462419	0.989	0.874	1.66145e-07	Pulmonary Venous	Cox6c
Pkp4	1.23926e-11	0.35292	0.379	0.121	2.24665e-07	Pulmonary Venous	Pkp4
Prnp	1.50318e-11	0.309141	0.558	0.215	2.72511e-07	Pulmonary Venous	Prnp
AABR07041096.1	1.8932e-11	0.343567	0.221	0.047	3.43219e-07	Pulmonary Venous	AABR07041096.1
Ptprb	3.24195e-11	0.50083	0.863	0.619	5.87732e-07	Pulmonary Venous	Ptprb
Itga5	3.42597e-11	0.510344	0.663	0.341	6.21094e-07	Pulmonary Venous	Itga5
Rarb	3.69094e-11	0.418157	0.4	0.136	6.6913e-07	Pulmonary Venous	Rarb
Alcam	4.37803e-11	0.394172	0.347	0.106	7.93694e-07	Pulmonary Venous	Alcam
Maob	6.81414e-11	0.517147	0.632	0.301	1.23533e-06	Pulmonary Venous	Maob
Ier3	7.53958e-11	0.500584	0.495	0.208	1.36685e-06	Pulmonary Venous	Ier3
Creb5	7.88738e-11	0.394233	0.432	0.155	1.4299e-06	Pulmonary Venous	Creb5
Mall	1.11869e-10	0.256493	0.137	0.019	2.02807e-06	Pulmonary Venous	Mall
Rab4a	1.52441e-10	0.332993	0.411	0.143	2.76361e-06	Pulmonary Venous	Rab4a
Fcgrt	1.52725e-10	0.253344	0.547	0.211	2.76876e-06	Pulmonary Venous	Fcgrt
Casp1	1.84742e-10	0.470891	0.726	0.393	3.3492e-06	Pulmonary Venous	Casp1
Lgals3	2.10316e-10	0.310698	0.295	0.084	3.81281e-06	Pulmonary Venous	Lgals3
Ahnak	2.43527e-10	0.561977	0.853	0.537	4.4149e-06	Pulmonary Venous	Ahnak
Pkhd1l1	2.51054e-10	0.437813	0.137	0.02	4.55135e-06	Pulmonary Venous	Pkhd1l1
Cd47	2.56478e-10	0.453459	0.716	0.383	4.64968e-06	Pulmonary Venous	Cd47
Rps28	2.73453e-10	0.354947	0.958	0.929	4.95743e-06	Pulmonary Venous	Rps28
Rps11	3.32411e-10	0.308784	1	0.967	6.02628e-06	Pulmonary Venous	Rps11
Vcan	3.74263e-10	0.446049	0.347	0.111	6.78501e-06	Pulmonary Venous	Vcan
Tc2n	4.07654e-10	0.317167	0.274	0.075	7.39036e-06	Pulmonary Venous	Tc2n
Slfn2	4.17965e-10	0.464917	0.568	0.258	7.57729e-06	Pulmonary Venous	Slfn2
N4bp2	4.55457e-10	0.327892	0.368	0.128	8.25698e-06	Pulmonary Venous	N4bp2
Zfp36	4.66785e-10	0.675077	0.558	0.278	8.46235e-06	Pulmonary Venous	Zfp36
Nov	6.77016e-10	0.288845	0.232	0.057	1.22736e-05	Pulmonary Venous	Nov
Sulf2	6.90223e-10	0.329346	0.232	0.059	1.25131e-05	Pulmonary Venous	Sulf2
Tcf7l2	7.16343e-10	0.423932	0.379	0.141	1.29866e-05	Pulmonary Venous	Tcf7l2
Wdfy1	7.67696e-10	0.39832	0.411	0.154	1.39176e-05	Pulmonary Venous	Wdfy1
Rps8	1.33307e-09	0.318962	1	0.978	2.41672e-05	Pulmonary Venous	Rps8
Fos	1.37119e-09	0.755273	0.537	0.257	2.48583e-05	Pulmonary Venous	Fos
Cpne8	1.4583e-09	0.324474	0.347	0.121	2.64375e-05	Pulmonary Venous	Cpne8
Rilpl2	1.54707e-09	0.292062	0.379	0.136	2.80469e-05	Pulmonary Venous	Rilpl2
Plcb4	1.69554e-09	0.366196	0.589	0.286	3.07385e-05	Pulmonary Venous	Plcb4
Bmp4	2.06621e-09	0.395612	0.474	0.197	3.74584e-05	Pulmonary Venous	Bmp4
Palm	2.63745e-09	0.324801	0.316	0.101	4.78144e-05	Pulmonary Venous	Palm
Rps9l1	3.27084e-09	0.308598	1	0.949	5.92971e-05	Pulmonary Venous	Rps9l1
Gsta6	3.74318e-09	0.299082	0.379	0.138	6.78601e-05	Pulmonary Venous	Gsta6
Ndufa8	3.92359e-09	0.40122	0.853	0.611	7.11307e-05	Pulmonary Venous	Ndufa8
Per3	4.13104e-09	0.298544	0.4	0.149	7.48915e-05	Pulmonary Venous	Per3
Serpinb6a	5.00173e-09	0.433517	0.8	0.536	9.06764e-05	Pulmonary Venous	Serpinb6a
Mfap21	5.01351e-09	0.424923	0.821	0.615	9.08898e-05	Pulmonary Venous	Mfap2
Snx3	6.02021e-09	0.368727	0.895	0.719	0.00010914	Pulmonary Venous	Snx3
Rpl3	6.347e-09	0.313728	1	0.947	0.000115065	Pulmonary Venous	Rpl3
Rpl35	7.24514e-09	0.340843	1	0.961	0.000131347	Pulmonary Venous	Rpl35
Jag1	7.40987e-09	0.315288	0.568	0.27	0.000134333	Pulmonary Venous	Jag1
Rps15a	7.68699e-09	0.278373	1	0.981	0.000139357	Pulmonary Venous	Rps15a
Fam3d	1.08408e-08	0.251143	0.2	0.049	0.000196533	Pulmonary Venous	Fam3d
Rps4x	1.15579e-08	0.320301	0.989	0.974	0.000209533	Pulmonary Venous	Rps4x
Tbc1d23	1.28898e-08	0.251397	0.463	0.193	0.000233679	Pulmonary Venous	Tbc1d23
Apol3	1.58795e-08	0.395913	0.758	0.482	0.000287879	Pulmonary Venous	Apol3
Impa1	1.69012e-08	0.357762	0.516	0.239	0.000306401	Pulmonary Venous	Impa1
LOC108348250	1.98196e-08	0.317115	0.179	0.042	0.000359309	Pulmonary Venous	LOC108348250
Plpp31	2.03405e-08	0.49527	0.695	0.445	0.000368753	Pulmonary Venous	Plpp3
Tinagl1	2.12894e-08	0.262476	0.168	0.038	0.000385956	Pulmonary Venous	Tinagl1
Ephb4	2.17198e-08	0.377692	0.695	0.384	0.000393758	Pulmonary Venous	Ephb4
Fosb	2.34191e-08	0.265125	0.358	0.132	0.000424564	Pulmonary Venous	Fosb
LOC100911847	2.50819e-08	0.275643	1	0.959	0.000454711	Pulmonary Venous	LOC100911847
Zmiz1	2.58838e-08	0.424684	0.821	0.646	0.000469247	Pulmonary Venous	Zmiz1
Nfat5	3.15968e-08	0.412107	0.663	0.367	0.000572819	Pulmonary Venous	Nfat5
Skap2	3.25925e-08	0.402178	0.842	0.624	0.000590869	Pulmonary Venous	Skap2
Dap	3.53315e-08	0.321375	0.389	0.158	0.000640525	Pulmonary Venous	Dap
Rassf9	3.53338e-08	0.499259	0.368	0.155	0.000640566	Pulmonary Venous	Rassf9
Malsu1	4.13253e-08	0.250278	0.305	0.104	0.000749187	Pulmonary Venous	Malsu1
Rpl15	5.00196e-08	0.283886	0.979	0.937	0.000906805	Pulmonary Venous	Rpl15
Zfp521	5.36929e-08	0.264083	0.295	0.103	0.000973399	Pulmonary Venous	Zfp521
Lgals9	5.54674e-08	0.27392	0.316	0.113	0.00100557	Pulmonary Venous	Lgals9
Eps8	5.55373e-08	0.277999	0.179	0.043	0.00100683	Pulmonary Venous	Eps8
Rps18	7.23187e-08	0.328937	1	0.945	0.00131107	Pulmonary Venous	Rps18
Rpl34	7.71528e-08	0.293038	0.989	0.96	0.0013987	Pulmonary Venous	Rpl34
LOC102549726	7.96756e-08	0.278475	0.421	0.179	0.00144444	Pulmonary Venous	LOC102549726
B3gnt2	8.53176e-08	0.282635	0.358	0.14	0.00154672	Pulmonary Venous	B3gnt2
Runx1t1	8.73004e-08	0.503193	0.621	0.388	0.00158267	Pulmonary Venous	Runx1t1
Rpl7	8.76461e-08	0.267653	0.989	0.955	0.00158894	Pulmonary Venous	Rpl7
Ripply31	9.94467e-08	0.350393	0.8	0.545	0.00180287	Pulmonary Venous	Ripply3
Nudt4	1.02475e-07	0.445067	0.811	0.554	0.00185777	Pulmonary Venous	Nudt4
Phlda3	1.06893e-07	0.307792	0.305	0.108	0.00193787	Pulmonary Venous	Phlda3
Zfp36l1	1.25544e-07	0.468316	0.832	0.664	0.00227599	Pulmonary Venous	Zfp36l1
Tmem109	1.63916e-07	0.370722	0.705	0.421	0.00297163	Pulmonary Venous	Tmem109
Rpl10	2.43759e-07	0.300796	1	0.961	0.0044191	Pulmonary Venous	Rpl10
Cpd	2.51082e-07	0.342273	0.705	0.456	0.00455187	Pulmonary Venous	Cpd
Casp4	2.54473e-07	0.298222	0.379	0.159	0.00461335	Pulmonary Venous	Casp4
Cebpb	2.62386e-07	0.256021	0.284	0.101	0.00475679	Pulmonary Venous	Cebpb
Ifi27	2.62645e-07	0.327024	0.989	0.916	0.00476149	Pulmonary Venous	Ifi27
Fzd6	2.79938e-07	0.307853	0.463	0.208	0.00507499	Pulmonary Venous	Fzd6
Swt1	2.91123e-07	0.372055	0.632	0.349	0.00527776	Pulmonary Venous	Swt1
Foxp1	3.10514e-07	0.354121	0.674	0.42	0.00562932	Pulmonary Venous	Foxp1
Sp110	4.22151e-07	0.283285	0.463	0.222	0.00765317	Pulmonary Venous	Sp110
Ly6e	4.46997e-07	0.289115	0.979	0.869	0.00810362	Pulmonary Venous	Ly6e
Fam89b	5.4244e-07	0.269173	0.463	0.216	0.00983389	Pulmonary Venous	Fam89b
Ebpl	6.06416e-07	0.31135	0.358	0.153	0.0109937	Pulmonary Venous	Ebpl
Nck11	6.20954e-07	0.290589	0.705	0.424	0.0112573	Pulmonary Venous	Nck1
Fgl2	6.79264e-07	0.360747	0.211	0.066	0.0123144	Pulmonary Venous	Fgl2
Serpine2	7.43919e-07	0.256596	0.295	0.112	0.0134865	Pulmonary Venous	Serpine2
Tspan6	7.63234e-07	0.336205	0.884	0.64	0.0138367	Pulmonary Venous	Tspan6
Spint2	8.02694e-07	0.316212	0.568	0.301	0.014552	Pulmonary Venous	Spint2
Plxnd1	8.04867e-07	0.347102	0.6	0.339	0.0145914	Pulmonary Venous	Plxnd1
Junb	8.18249e-07	0.408253	0.642	0.379	0.014834	Pulmonary Venous	Junb
Actn1	9.67374e-07	0.372617	0.453	0.215	0.0175375	Pulmonary Venous	Actn1
Tnfrsf1a	1.06326e-06	0.275172	0.463	0.226	0.0192759	Pulmonary Venous	Tnfrsf1a
Klf10	1.20787e-06	0.296499	0.611	0.344	0.0218975	Pulmonary Venous	Klf10
Nfe2l2	1.22318e-06	0.342079	0.505	0.257	0.022175	Pulmonary Venous	Nfe2l2
Tes	1.74705e-06	0.253837	0.558	0.299	0.0316722	Pulmonary Venous	Tes
Grina	1.76708e-06	0.292371	0.589	0.338	0.0320353	Pulmonary Venous	Grina
Ier5	1.79883e-06	0.282113	0.474	0.239	0.0326109	Pulmonary Venous	Ier5
Klf3	1.85569e-06	0.316302	0.779	0.6	0.0336417	Pulmonary Venous	Klf3
Agrn	2.05402e-06	0.275889	0.737	0.452	0.0372374	Pulmonary Venous	Agrn
Gata3	2.61094e-06	0.342984	0.463	0.233	0.0473337	Pulmonary Venous	Gata3
Rpl24	3.03842e-06	0.256526	0.989	0.967	0.0550835	Pulmonary Venous	Rpl24
Btg2	3.05018e-06	0.385909	0.779	0.542	0.0552967	Pulmonary Venous	Btg2
Fhl1	3.27668e-06	0.259871	0.663	0.394	0.059403	Pulmonary Venous	Fhl1
Rps23	3.50987e-06	0.256163	1	0.969	0.0636305	Pulmonary Venous	Rps23
Rhoc	3.77701e-06	0.37866	0.747	0.512	0.0684735	Pulmonary Venous	Rhoc
Ensa	4.16084e-06	0.332255	0.505	0.274	0.0754319	Pulmonary Venous	Ensa
Serpinb9	5.50862e-06	0.381493	0.474	0.252	0.0998659	Pulmonary Venous	Serpinb9
Ece1	5.54501e-06	0.270432	0.779	0.516	0.100525	Pulmonary Venous	Ece1
Htra1	5.56205e-06	0.298196	0.411	0.198	0.100834	Pulmonary Venous	Htra1
Jak1	6.13292e-06	0.292482	0.526	0.29	0.111184	Pulmonary Venous	Jak1
Tlnrd11	6.50819e-06	0.313468	0.716	0.501	0.117987	Pulmonary Venous	Tlnrd1
Eef1a1	6.6354e-06	0.330892	0.821	0.628	0.120293	Pulmonary Venous	Eef1a1
LOC691995	6.87106e-06	0.257199	0.179	0.056	0.124565	Pulmonary Venous	LOC691995
Pltp	7.82237e-06	0.338291	0.684	0.43	0.141812	Pulmonary Venous	Pltp
Adgrl21	8.63159e-06	0.355645	0.716	0.502	0.156482	Pulmonary Venous	Adgrl2
Rpl29	1.03759e-05	0.253449	0.968	0.941	0.188104	Pulmonary Venous	Rpl29
Abracl	1.09554e-05	0.292221	0.874	0.686	0.198611	Pulmonary Venous	Abracl
Tgfb2	1.11152e-05	0.434343	0.432	0.22	0.201507	Pulmonary Venous	Tgfb2
Dusp1	1.34743e-05	0.406091	0.758	0.635	0.244276	Pulmonary Venous	Dusp1
Rpsa	1.38091e-05	0.257343	0.989	0.94	0.250344	Pulmonary Venous	Rpsa
Eml4	1.46425e-05	0.253848	0.547	0.313	0.265453	Pulmonary Venous	Eml4
LOC100360413	1.47194e-05	0.3171	0.663	0.421	0.266848	Pulmonary Venous	LOC100360413
Usp34	2.70095e-05	0.26093	0.442	0.228	0.489654	Pulmonary Venous	Usp34
Cavin1	3.10795e-05	0.285304	0.884	0.759	0.56344	Pulmonary Venous	Cavin1
Nfkbia	3.1871e-05	0.303656	0.642	0.419	0.57779	Pulmonary Venous	Nfkbia
Bpgm	3.22293e-05	0.311472	0.358	0.175	0.584285	Pulmonary Venous	Bpgm
Cmip	3.64117e-05	0.282582	0.295	0.134	0.660107	Pulmonary Venous	Cmip
Sod1	3.66548e-05	0.252343	0.716	0.442	0.664515	Pulmonary Venous	Sod1
Rps5	3.80603e-05	0.277846	0.989	0.933	0.689995	Pulmonary Venous	Rps5
Myrip	3.84306e-05	0.272102	0.516	0.29	0.696709	Pulmonary Venous	Myrip
Klf41	4.0382e-05	0.289978	0.842	0.654	0.732086	Pulmonary Venous	Klf4
Gpi	6.87968e-05	0.288696	0.674	0.465	1	Pulmonary Venous	Gpi
Eef2	7.81485e-05	0.314534	0.863	0.693	1	Pulmonary Venous	Eef2
Ecpas	8.04571e-05	0.26941	0.368	0.187	1	Pulmonary Venous	Ecpas
Egr1	8.69772e-05	0.384067	0.547	0.34	1	Pulmonary Venous	Egr1
Bcap31	9.08879e-05	0.253757	0.726	0.502	1	Pulmonary Venous	Bcap31
Eef1g	0.000169605	0.295098	0.916	0.781	1	Pulmonary Venous	Eef1g
AC134224.2	0.000172194	0.260235	0.411	0.232	1	Pulmonary Venous	AC134224.2
AC134224.1	0.000177403	0.365055	0.832	0.707	1	Pulmonary Venous	AC134224.1
Ninj1	0.000208502	0.251614	0.358	0.186	1	Pulmonary Venous	Ninj1
Fabp5	0.000237699	0.259513	0.516	0.322	1	Pulmonary Venous	Fabp5
Kras	0.000252879	0.262645	0.484	0.298	1	Pulmonary Venous	Kras
Hpcal1	0.00025461	0.325051	0.579	0.384	1	Pulmonary Venous	Hpcal1
Rpl26	0.000324439	0.267483	0.937	0.839	1	Pulmonary Venous	Rpl26
Mrps33	0.000342858	0.268823	0.663	0.427	1	Pulmonary Venous	Mrps33
Ormdl2	0.000430635	0.260732	0.463	0.289	1	Pulmonary Venous	Ormdl2
Arl4a	0.00070493	0.289797	0.474	0.298	1	Pulmonary Venous	Arl4a
Jund	0.00101716	0.343774	0.716	0.53	1	Pulmonary Venous	Jund
Dcn	0.001193	1.02057	0.168	0.072	1	Pulmonary Venous	Dcn
Nfib	0.00125876	0.25034	0.442	0.271	1	Pulmonary Venous	Nfib
Laptm4b	0.00132335	0.260315	0.537	0.365	1	Pulmonary Venous	Laptm4b
Bpnt1	0.00173509	0.260521	0.326	0.19	1	Pulmonary Venous	Bpnt1
Eif3f	0.00250344	0.31283	0.684	0.503	1	Pulmonary Venous	Eif3f
Rps10l1	0.00585989	0.264769	0.863	0.71	1	Pulmonary Venous	Rps10l1
Aqp7	3.26709e-66	1.00674	0.286	0	5.9229e-62	Systemic Venous	Aqp7
Cecr2	3.26709e-66	0.313222	0.286	0	5.9229e-62	Systemic Venous	Cecr2
Adgrg1	2.94754e-61	1.5556	1	0.019	5.3436e-57	Systemic Venous	Adgrg1
Rgs16	3.4106e-56	1.33391	1	0.021	6.18308e-52	Systemic Venous	Rgs16
Fam167b	2.50937e-52	1.44808	0.714	0.011	4.54924e-48	Systemic Venous	Fam167b
C1qtnf9	1.08634e-49	0.715706	0.429	0.003	1.96943e-45	Systemic Venous	C1qtnf9
Colec11	1.4182e-44	0.732978	0.286	0.001	2.57106e-40	Systemic Venous	Colec11
Fabp4	8.56016e-42	5.08276	1	0.033	1.55187e-37	Systemic Venous	Fabp4
Vwa1	1.70621e-37	0.829574	0.429	0.005	3.09319e-33	Systemic Venous	Vwa1
Csrp3	6.32432e-34	0.495597	0.143	0	1.14654e-29	Systemic Venous	Csrp3
Nrk	6.32432e-34	0.447949	0.143	0	1.14654e-29	Systemic Venous	Nrk
Cd180	6.32432e-34	0.364997	0.143	0	1.14654e-29	Systemic Venous	Cd180
Cd300e	1.29841e-33	0.308703	0.286	0.002	2.35388e-29	Systemic Venous	Cd300e
Cidec	3.56439e-27	0.515898	0.286	0.003	6.46188e-23	Systemic Venous	Cidec
Ptpn22	5.02567e-27	0.391546	0.286	0.003	9.11103e-23	Systemic Venous	Ptpn22
AABR07013798.1	8.60184e-23	0.544811	0.286	0.004	1.55943e-18	Systemic Venous	AABR07013798.1
Alox12	1.25943e-22	0.489169	0.286	0.004	2.28322e-18	Systemic Venous	Alox12
Ace2	5.178e-22	1.19823	0.429	0.011	9.38719e-18	Systemic Venous	Ace2
Igf2	1.92371e-19	1.90122	0.857	0.058	3.48749e-15	Systemic Venous	Igf2
Kcnj8	3.1033e-18	0.868506	0.429	0.014	5.62597e-14	Systemic Venous	Kcnj8
Sln	1.34291e-17	0.447683	0.143	0.001	2.43456e-13	Systemic Venous	Sln
Bpifa5	1.34291e-17	0.447158	0.143	0.001	2.43456e-13	Systemic Venous	Bpifa5
Fcmr	1.34291e-17	0.363562	0.143	0.001	2.43456e-13	Systemic Venous	Fcmr
Brdt	1.55057e-17	0.36858	0.143	0.001	2.81103e-13	Systemic Venous	Brdt
Papss2	2.665e-17	0.604578	0.286	0.006	4.83139e-13	Systemic Venous	Papss2
Fam198b	5.81361e-16	1.8626	0.714	0.049	1.05395e-11	Systemic Venous	Fam198b
AABR07028749.2	1.71065e-15	0.33476	0.286	0.007	3.10124e-11	Systemic Venous	AABR07028749.2
Ly6h	1.94238e-15	0.513047	0.286	0.007	3.52134e-11	Systemic Venous	Ly6h
Twist1	4.53589e-14	0.587529	0.286	0.008	8.22312e-10	Systemic Venous	Twist1
Gem	4.8032e-14	0.539725	0.286	0.008	8.70772e-10	Systemic Venous	Gem
Ebf1	6.12451e-14	1.0814	0.571	0.035	1.11031e-09	Systemic Venous	Ebf1
Mrvi1	7.01307e-13	0.774945	0.286	0.009	1.2714e-08	Systemic Venous	Mrvi1
Tnni2	8.19739e-13	0.766279	0.286	0.009	1.48611e-08	Systemic Venous	Tnni2
Cacna1g	4.04992e-12	0.372226	0.143	0.002	7.34211e-08	Systemic Venous	Cacna1g
Ngf	4.04992e-12	0.371906	0.143	0.002	7.34211e-08	Systemic Venous	Ngf
LOC499796	4.04992e-12	0.36421	0.143	0.002	7.34211e-08	Systemic Venous	LOC499796
AABR07038849.1	4.45806e-12	0.361411	0.143	0.002	8.08202e-08	Systemic Venous	AABR07038849.1
Gsn	3.50368e-11	1.21388	0.857	0.103	6.35182e-07	Systemic Venous	Gsn
Ebf3	5.00088e-11	0.465874	0.286	0.011	9.06609e-07	Systemic Venous	Ebf3
Mall1	3.52718e-10	0.663555	0.429	0.027	6.39443e-06	Systemic Venous	Mall
Rbp7	3.56554e-10	2.35932	0.714	0.084	6.46397e-06	Systemic Venous	Rbp7
Ndn	4.04673e-10	0.548444	0.429	0.027	7.33632e-06	Systemic Venous	Ndn
Cpeb2	4.28519e-10	0.274715	0.286	0.012	7.76863e-06	Systemic Venous	Cpeb2
Mus81	5.68525e-10	0.809643	0.429	0.028	1.03068e-05	Systemic Venous	Mus81
RGD1565355	1.06971e-09	0.730338	0.286	0.013	1.93927e-05	Systemic Venous	RGD1565355
Ank3	1.29439e-09	0.384792	0.286	0.013	2.3466e-05	Systemic Venous	Ank3
Lcn2	1.81333e-09	1.06384	0.857	0.118	3.28739e-05	Systemic Venous	Lcn2
Nim1k	2.31744e-09	0.488211	0.143	0.003	4.20128e-05	Systemic Venous	Nim1k
Tmod1	2.31744e-09	0.487036	0.143	0.003	4.20128e-05	Systemic Venous	Tmod1
LOC100909657	2.31744e-09	0.443904	0.143	0.003	4.20128e-05	Systemic Venous	LOC100909657
AABR07027870.1	2.31744e-09	0.369107	0.143	0.003	4.20128e-05	Systemic Venous	AABR07027870.1
Il13ra2	2.31744e-09	0.364236	0.143	0.003	4.20128e-05	Systemic Venous	Il13ra2
Fam180a	2.49075e-09	0.485208	0.143	0.003	4.51549e-05	Systemic Venous	Fam180a
Sh3bgr	2.49075e-09	0.359097	0.143	0.003	4.51549e-05	Systemic Venous	Sh3bgr
Alb	2.67667e-09	0.349838	0.143	0.003	4.85254e-05	Systemic Venous	Alb
Tcf15	2.68017e-09	0.792574	0.429	0.031	4.85889e-05	Systemic Venous	Tcf15
Pdlim4	5.04494e-09	0.436464	0.286	0.014	9.14597e-05	Systemic Venous	Pdlim4
Ephx1	9.23666e-09	0.571972	0.429	0.032	0.000167451	Systemic Venous	Ephx1
Itgb2	2.11815e-08	0.300678	0.286	0.015	0.000384	Systemic Venous	Itgb2
Mgat4a	3.34638e-08	0.441725	0.286	0.015	0.000606666	Systemic Venous	Mgat4a
Gpihbp11	4.8419e-08	2.23495	1	0.259	0.000877788	Systemic Venous	Gpihbp1
Chp2	5.53911e-08	0.918207	0.429	0.037	0.00100419	Systemic Venous	Chp2
Sez6	8.14057e-08	0.705957	0.286	0.016	0.0014758	Systemic Venous	Sez6
Fhl2	8.38949e-08	0.607022	0.286	0.016	0.00152093	Systemic Venous	Fhl2
Pparg	9.18129e-08	0.564415	0.286	0.016	0.00166448	Systemic Venous	Pparg
Gpc4	9.38367e-08	1.04029	0.571	0.066	0.00170117	Systemic Venous	Gpc4
Saxo2	1.07169e-07	0.491316	0.143	0.004	0.00194287	Systemic Venous	Saxo2
Mrgprf	1.07169e-07	0.491051	0.143	0.004	0.00194287	Systemic Venous	Mrgprf
Wdr27	1.13544e-07	0.366015	0.143	0.004	0.00205844	Systemic Venous	Wdr27
Zfp771	1.16628e-07	0.289826	0.286	0.016	0.00211435	Systemic Venous	Zfp771
Lrg1	1.17628e-07	0.539745	0.429	0.036	0.00213248	Systemic Venous	Lrg1
Loxl3	1.20285e-07	0.352201	0.143	0.004	0.00218065	Systemic Venous	Loxl3
Lck	1.33178e-07	0.584853	0.429	0.038	0.00241439	Systemic Venous	Lck
Ptn	1.55493e-07	1.06747	0.714	0.105	0.00281893	Systemic Venous	Ptn
Wipf3	1.81422e-07	0.565828	0.286	0.017	0.003289	Systemic Venous	Wipf3
Cox6b2	1.9767e-07	0.59601	0.286	0.017	0.00358355	Systemic Venous	Cox6b2
Oxld1	2.27922e-07	0.450329	0.286	0.017	0.00413199	Systemic Venous	Oxld1
Rnpep	2.37336e-07	0.858246	0.571	0.073	0.00430266	Systemic Venous	Rnpep
Igfbp3	3.47158e-07	0.609184	0.429	0.041	0.00629362	Systemic Venous	Igfbp3
Bace2	5.33462e-07	0.322537	0.286	0.018	0.00967114	Systemic Venous	Bace2
Mgst21	6.23931e-07	0.999421	0.571	0.075	0.0113112	Systemic Venous	Mgst2
Dnaja3	8.45741e-07	0.522365	0.429	0.043	0.0153324	Systemic Venous	Dnaja3
Fabp51	8.52747e-07	1.52375	1	0.336	0.0154594	Systemic Venous	Fabp5
RGD1305645	9.66051e-07	0.423058	0.286	0.019	0.0175135	Systemic Venous	RGD1305645
Ndrg2	1.12214e-06	0.720123	0.429	0.044	0.0203433	Systemic Venous	Ndrg2
Sh3glb2	1.13504e-06	1.40449	0.571	0.085	0.0205771	Systemic Venous	Sh3glb2
Acat2l1	1.40294e-06	0.484944	0.143	0.005	0.0254338	Systemic Venous	Acat2l1
Col6a21	1.43181e-06	1.28996	0.714	0.132	0.0259573	Systemic Venous	Col6a2
Tigd2	1.47224e-06	0.361468	0.143	0.005	0.0266903	Systemic Venous	Tigd2
AABR07005838.1	1.47224e-06	0.356304	0.143	0.005	0.0266903	Systemic Venous	AABR07005838.1
Foxs1	1.47224e-06	0.354968	0.143	0.005	0.0266903	Systemic Venous	Foxs1
Nxph1	2.02445e-06	0.356819	0.286	0.02	0.0367013	Systemic Venous	Nxph1
Eps8l2	2.07464e-06	0.298458	0.286	0.02	0.0376112	Systemic Venous	Eps8l2
Smpx	3.60879e-06	0.603375	0.286	0.022	0.0654238	Systemic Venous	Smpx
Rrad	3.86601e-06	0.689737	0.286	0.022	0.0700869	Systemic Venous	Rrad
Unc13d	5.02845e-06	0.724423	0.429	0.05	0.0911608	Systemic Venous	Unc13d
Cdh13	5.43314e-06	0.758378	0.429	0.05	0.0984974	Systemic Venous	Cdh13
Mgmt1	8.71097e-06	0.616216	0.571	0.089	0.157921	Systemic Venous	Mgmt
Zap70	8.9078e-06	0.366535	0.143	0.006	0.161489	Systemic Venous	Zap70
Bckdha	9.15503e-06	0.838568	0.429	0.055	0.165971	Systemic Venous	Bckdha
Egr2	9.28419e-06	0.485448	0.143	0.006	0.168313	Systemic Venous	Egr2
Syap1	9.78797e-06	0.870436	1	0.295	0.177446	Systemic Venous	Syap1
Ulk2	1.05668e-05	0.982555	0.714	0.154	0.191565	Systemic Venous	Ulk2
Meox21	1.23877e-05	0.764292	0.571	0.093	0.224576	Systemic Venous	Meox2
Col16a1	1.63537e-05	0.641199	0.286	0.025	0.296477	Systemic Venous	Col16a1
Gprc5b	1.72939e-05	0.295799	0.286	0.024	0.313522	Systemic Venous	Gprc5b
LOC108348108	2.12718e-05	0.485263	0.286	0.025	0.385637	Systemic Venous	LOC108348108
Fam69a	2.42169e-05	0.845756	0.429	0.059	0.439028	Systemic Venous	Fam69a
Prnp1	2.76907e-05	0.89004	0.857	0.242	0.502005	Systemic Venous	Prnp
Fam69b	3.01202e-05	0.277961	0.286	0.026	0.54605	Systemic Venous	Fam69b
LOC684270	3.46798e-05	0.560037	0.429	0.058	0.62871	Systemic Venous	LOC684270
Tnfsf12	3.50207e-05	0.707761	0.714	0.16	0.63489	Systemic Venous	Tnfsf12
Tceanc2	3.51656e-05	0.658326	0.429	0.059	0.637518	Systemic Venous	Tceanc2
Oplah	3.59303e-05	0.433629	0.143	0.007	0.65138	Systemic Venous	Oplah
Vtn	3.7257e-05	0.359435	0.143	0.007	0.675432	Systemic Venous	Vtn
Dixdc1	3.7257e-05	0.359181	0.143	0.007	0.675432	Systemic Venous	Dixdc1
Pea15	3.90669e-05	1.09187	1	0.367	0.708244	Systemic Venous	Pea15
Coq7	3.94629e-05	0.848166	0.571	0.109	0.715423	Systemic Venous	Coq7
Sult1a1	4.09175e-05	0.537378	0.286	0.027	0.741794	Systemic Venous	Sult1a1
Tmsb4x	4.10673e-05	0.789474	1	1	0.744509	Systemic Venous	Tmsb4x
Ptprr	4.21589e-05	0.704377	0.286	0.028	0.764298	Systemic Venous	Ptprr
Ada	5.36125e-05	0.800458	0.571	0.109	0.971941	Systemic Venous	Ada
Cavin3	5.55252e-05	1.23141	0.857	0.322	1	Systemic Venous	Cavin3
Gapdh	5.66115e-05	0.721122	1	0.322	1	Systemic Venous	Gapdh
Zfp322a	6.09162e-05	0.529643	0.571	0.102	1	Systemic Venous	Zfp322a
LOC100364435	6.63136e-05	1.01817	1	0.983	1	Systemic Venous	LOC100364435
Ndrg1	9.02255e-05	0.435399	0.429	0.063	1	Systemic Venous	Ndrg1
Tnc	9.29661e-05	1.11038	0.714	0.186	1	Systemic Venous	Tnc
Pde2a	9.59508e-05	0.49847	0.429	0.064	1	Systemic Venous	Pde2a
Laptm4b1	0.000102824	0.825907	1	0.376	1	Systemic Venous	Laptm4b
Phf23	0.000106192	0.799482	0.714	0.188	1	Systemic Venous	Phf23
Rpsa1	0.000106766	0.714776	1	0.944	1	Systemic Venous	Rpsa
Rps21	0.000108392	0.790364	1	0.823	1	Systemic Venous	Rps21
Tmem178a	0.000109179	0.468294	0.286	0.03	1	Systemic Venous	Tmem178a
RGD1561113	0.000110504	0.476083	0.143	0.008	1	Systemic Venous	RGD1561113
Hdac9	0.000110504	0.430305	0.143	0.008	1	Systemic Venous	Hdac9
Pygo1	0.000110504	0.42969	0.143	0.008	1	Systemic Venous	Pygo1
Tmem255b1	0.000113147	0.690179	0.571	0.114	1	Systemic Venous	Tmem255b
AABR07043510.1	0.000114121	0.351121	0.143	0.008	1	Systemic Venous	AABR07043510.1
Fryl	0.000116295	0.328395	0.429	0.064	1	Systemic Venous	Fryl
LOC103691005	0.000118806	0.465858	0.286	0.031	1	Systemic Venous	LOC103691005
Zfp512b	0.000123584	0.312932	0.429	0.063	1	Systemic Venous	Zfp512b
Egr11	0.000125935	1.18954	0.857	0.356	1	Systemic Venous	Egr1
Sorbs2	0.000126736	0.680923	0.429	0.067	1	Systemic Venous	Sorbs2
Gadd45g	0.000136047	0.846363	0.571	0.118	1	Systemic Venous	Gadd45g
Cd248	0.000137168	0.877987	0.286	0.032	1	Systemic Venous	Cd248
Mrm2	0.000164766	0.688997	0.286	0.033	1	Systemic Venous	Mrm2
Naca	0.000166107	0.646127	1	0.917	1	Systemic Venous	Naca
Dkc1	0.000169514	0.660342	0.857	0.252	1	Systemic Venous	Dkc1
Eepd1	0.000178418	0.686125	0.286	0.033	1	Systemic Venous	Eepd1
Cav1	0.000188088	0.790267	1	0.955	1	Systemic Venous	Cav1
Tmem67	0.000198976	0.44749	0.286	0.032	1	Systemic Venous	Tmem67
LOC103694910	0.000212284	0.543723	0.286	0.033	1	Systemic Venous	LOC103694910
Ccdc88c	0.000218958	0.288801	0.286	0.032	1	Systemic Venous	Ccdc88c
Actr5	0.000233214	0.50527	0.286	0.033	1	Systemic Venous	Actr5
Apold1	0.000238883	0.736167	0.429	0.073	1	Systemic Venous	Apold1
Adamts2	0.00024343	0.631402	0.286	0.034	1	Systemic Venous	Adamts2
Mgst3	0.000249414	0.781567	0.714	0.207	1	Systemic Venous	Mgst3
Rps51	0.000251888	0.64229	1	0.938	1	Systemic Venous	Rps5
AABR07026557.1	0.000257463	0.476308	0.143	0.009	1	Systemic Venous	AABR07026557.1
Map2k6	0.000261387	0.736624	0.571	0.131	1	Systemic Venous	Map2k6
Btnl9	0.000265059	0.400235	0.143	0.009	1	Systemic Venous	Btnl9
Itk	0.000272864	0.428696	0.143	0.009	1	Systemic Venous	Itk
AC229945.1	0.000272864	0.350106	0.143	0.009	1	Systemic Venous	AC229945.1
Mutyh	0.000277093	0.621866	0.286	0.035	1	Systemic Venous	Mutyh
Cdkl1	0.000279405	0.424012	0.286	0.034	1	Systemic Venous	Cdkl1
Dnajc17	0.000291275	0.407662	0.429	0.07	1	Systemic Venous	Dnajc17
Ifitm31	0.000304546	1.07179	1	0.675	1	Systemic Venous	Ifitm3
Tox	0.000330141	0.274398	0.286	0.034	1	Systemic Venous	Tox
Cox4i2	0.000338859	0.830968	0.571	0.123	1	Systemic Venous	Cox4i2
Ldlrad4	0.000347449	0.616817	0.571	0.129	1	Systemic Venous	Ldlrad4
LOC103692169	0.000353716	0.81307	0.714	0.203	1	Systemic Venous	LOC103692169
Mrpl30	0.0003538	0.68994	0.714	0.2	1	Systemic Venous	Mrpl30
P2ry14	0.000362842	0.709133	0.286	0.036	1	Systemic Venous	P2ry14
Tgfb1	0.000366841	0.601318	0.714	0.184	1	Systemic Venous	Tgfb1
Ifitm1	0.000372343	0.884637	0.429	0.075	1	Systemic Venous	Ifitm1
Klhl4	0.000418691	0.666026	0.571	0.126	1	Systemic Venous	Klhl4
Lgals91	0.000429503	0.602615	0.571	0.129	1	Systemic Venous	Lgals9
Pla2g1b	0.000445436	0.430994	0.286	0.035	1	Systemic Venous	Pla2g1b
AABR07028769.1	0.000453182	0.455373	0.571	0.123	1	Systemic Venous	AABR07028769.1
Rpl28	0.000453954	0.654452	1	0.932	1	Systemic Venous	Rpl28
Cdc40	0.000461893	0.603324	0.571	0.129	1	Systemic Venous	Cdc40
Dtd1	0.000497122	0.682209	0.714	0.204	1	Systemic Venous	Dtd1
Scarb1	0.000509206	0.607408	0.714	0.198	1	Systemic Venous	Scarb1
Cthrc1	0.000519274	0.638468	0.429	0.078	1	Systemic Venous	Cthrc1
Hoxb5	0.000530327	0.487813	0.143	0.01	1	Systemic Venous	Hoxb5
Trem1	0.000530327	0.440703	0.143	0.01	1	Systemic Venous	Trem1
Exog	0.000581957	0.562216	0.286	0.038	1	Systemic Venous	Exog
Tnfrsf19	0.000589363	0.343614	0.143	0.01	1	Systemic Venous	Tnfrsf19
Rnf5	0.000627507	0.556188	0.571	0.132	1	Systemic Venous	Rnf5
Nprl2	0.000704506	0.436151	0.429	0.078	1	Systemic Venous	Nprl2
Tmem88	0.000738541	0.695405	0.714	0.233	1	Systemic Venous	Tmem88
Vps9d1	0.000744859	0.375568	0.286	0.038	1	Systemic Venous	Vps9d1
Inka2	0.000804525	0.537101	0.286	0.04	1	Systemic Venous	Inka2
Tril	0.000827509	0.84023	0.429	0.085	1	Systemic Venous	Tril
Rpl17	0.000839185	0.430255	1	0.977	1	Systemic Venous	Rpl17
Pccb	0.000848472	0.440835	0.571	0.132	1	Systemic Venous	Pccb
Fcgr2a	0.000864297	0.359878	0.286	0.038	1	Systemic Venous	Fcgr2a
Phkg2	0.000874792	0.649939	0.429	0.085	1	Systemic Venous	Phkg2
Ints8	0.000892503	0.637325	0.571	0.147	1	Systemic Venous	Ints8
Filip1	0.000894998	0.799921	0.571	0.156	1	Systemic Venous	Filip1
Gle1	0.000946406	0.372475	0.286	0.039	1	Systemic Venous	Gle1
Stx18	0.000985885	0.628016	0.429	0.088	1	Systemic Venous	Stx18
AABR07039446.2	0.000995664	0.426076	0.143	0.011	1	Systemic Venous	AABR07039446.2
RGD1561796	0.000995664	0.349666	0.143	0.011	1	Systemic Venous	RGD1561796
Rcn3	0.00100531	0.39665	0.286	0.04	1	Systemic Venous	Rcn3
Mgp	0.0010122	0.724056	0.857	0.312	1	Systemic Venous	Mgp
Smim13	0.00102009	0.349564	0.143	0.011	1	Systemic Venous	Smim13
Siah2	0.00102422	0.456461	0.286	0.041	1	Systemic Venous	Siah2
LOC100365839	0.00105777	0.566287	0.571	0.141	1	Systemic Venous	LOC100365839
Zcchc24	0.00106395	0.486886	0.429	0.086	1	Systemic Venous	Zcchc24
Galnt16	0.00107061	0.42461	0.143	0.011	1	Systemic Venous	Galnt16
Osbpl3	0.00107061	0.345087	0.143	0.011	1	Systemic Venous	Osbpl3
Dnmt3a	0.00107344	0.405943	0.571	0.132	1	Systemic Venous	Dnmt3a
Tspan11	0.00109673	0.343648	0.143	0.011	1	Systemic Venous	Tspan11
Enpep	0.00111979	0.726064	0.429	0.089	1	Systemic Venous	Enpep
Gipc2	0.00113773	0.609379	0.286	0.042	1	Systemic Venous	Gipc2
LOC690468	0.00113989	0.646428	1	0.688	1	Systemic Venous	LOC690468
Rem1	0.00119643	0.601121	0.286	0.042	1	Systemic Venous	Rem1
Mcf2l	0.00120356	0.428968	0.429	0.082	1	Systemic Venous	Mcf2l
Serpinb6b	0.0012122	0.616982	0.286	0.043	1	Systemic Venous	Serpinb6b
Cks1b1	0.00127746	0.64532	0.857	0.303	1	Systemic Venous	Cks1b
Bak1	0.00135485	0.568907	0.571	0.146	1	Systemic Venous	Bak1
Fggy	0.00135565	0.383713	0.286	0.042	1	Systemic Venous	Fggy
Rpl71	0.00140649	0.490308	1	0.957	1	Systemic Venous	Rpl7
Nr5a2	0.00142523	0.417723	0.429	0.084	1	Systemic Venous	Nr5a2
LOC103694506	0.00147914	0.770249	0.571	0.156	1	Systemic Venous	LOC103694506
Adarb1	0.00151543	0.388857	0.286	0.042	1	Systemic Venous	Adarb1
LOC100362830	0.0015831	0.564784	1	0.91	1	Systemic Venous	LOC100362830
Ecd	0.00158822	0.46244	0.286	0.043	1	Systemic Venous	Ecd
Rpl41	0.00158923	0.40707	1	0.998	1	Systemic Venous	Rpl41
Depdc5	0.00162726	0.39836	0.286	0.043	1	Systemic Venous	Depdc5
AABR07064804.1	0.00166392	0.472295	0.143	0.012	1	Systemic Venous	AABR07064804.1
LOC1009118471	0.00167327	0.502626	1	0.962	1	Systemic Venous	LOC100911847
Gaa	0.00168036	0.455046	0.286	0.044	1	Systemic Venous	Gaa
Rnh1	0.0018065	0.863004	0.857	0.347	1	Systemic Venous	Rnh1
Efcab10	0.0018194	0.331876	0.143	0.012	1	Systemic Venous	Efcab10
LOC680885	0.0018194	0.32882	0.143	0.012	1	Systemic Venous	LOC680885
Mdk	0.00184888	0.859844	0.571	0.158	1	Systemic Venous	Mdk
LOC100360522	0.00191642	0.656653	1	0.93	1	Systemic Venous	LOC100360522
Uba52	0.00191929	0.535567	1	0.964	1	Systemic Venous	Uba52
Rpl23	0.00195269	0.461042	1	0.985	1	Systemic Venous	Rpl23
Rpa31	0.0019595	0.604214	1	0.445	1	Systemic Venous	Rpa3
Hdac5	0.00201005	0.354624	0.429	0.087	1	Systemic Venous	Hdac5
Lpar1	0.00202405	0.674577	0.286	0.045	1	Systemic Venous	Lpar1
Yipf1	0.00208537	0.701838	0.571	0.168	1	Systemic Venous	Yipf1
Rps12	0.00223022	0.551915	1	0.956	1	Systemic Venous	Rps12
Polr3h	0.0023912	0.798387	0.571	0.171	1	Systemic Venous	Polr3h
Clic2	0.00251606	0.717875	0.286	0.046	1	Systemic Venous	Clic2
Adamts9	0.00252129	0.636468	0.429	0.099	1	Systemic Venous	Adamts9
Aif1l	0.00257405	0.313152	0.286	0.045	1	Systemic Venous	Aif1l
Taco1	0.00259042	0.420718	0.143	0.013	1	Systemic Venous	Taco1
Rgcc1	0.0026106	0.771079	0.857	0.337	1	Systemic Venous	Rgcc
Anxa21	0.00262517	0.792631	1	0.683	1	Systemic Venous	Anxa2
Enpp3	0.00266293	0.298401	0.286	0.045	1	Systemic Venous	Enpp3
Rbms2	0.00268857	0.611246	0.857	0.314	1	Systemic Venous	Rbms2
Mnda	0.00270041	0.33901	0.143	0.013	1	Systemic Venous	Mnda
Nudt14	0.00275551	0.402683	0.571	0.151	1	Systemic Venous	Nudt14
Eif3el1	0.00279145	0.644327	1	0.582	1	Systemic Venous	Eif3el1
Myl9	0.00285181	0.788439	0.571	0.172	1	Systemic Venous	Myl9
H2afy2	0.00287343	0.322916	0.143	0.013	1	Systemic Venous	H2afy2
Rilpl21	0.00287946	0.396412	0.571	0.156	1	Systemic Venous	Rilpl2
Rpl101	0.00288166	0.527079	1	0.964	1	Systemic Venous	Rpl10
Atp5mc2	0.00293972	0.547272	1	0.846	1	Systemic Venous	Atp5mc2
Tagln21	0.00309878	0.513648	1	0.932	1	Systemic Venous	Tagln2
Fosb1	0.00315431	0.358712	0.571	0.15	1	Systemic Venous	Fosb
Pigc	0.00318881	0.496354	0.714	0.237	1	Systemic Venous	Pigc
Tinagl11	0.00325855	0.459787	0.286	0.048	1	Systemic Venous	Tinagl1
Tnfrsf21	0.00351335	0.446478	0.286	0.048	1	Systemic Venous	Tnfrsf21
Supt20h	0.00351522	0.478333	0.571	0.162	1	Systemic Venous	Supt20h
Coa7	0.00366487	0.253404	0.286	0.046	1	Systemic Venous	Coa7
Tmem200a	0.00373631	0.434168	0.143	0.014	1	Systemic Venous	Tmem200a
Tspy26	0.00388459	0.355759	0.143	0.014	1	Systemic Venous	Tspy26
Mtg1	0.00392275	0.488903	0.286	0.049	1	Systemic Venous	Mtg1
Rpl11	0.0039245	0.418309	1	0.98	1	Systemic Venous	Rpl11
Lypd1	0.00396071	0.343885	0.143	0.014	1	Systemic Venous	Lypd1
Mctp1	0.00396071	0.265123	0.143	0.014	1	Systemic Venous	Mctp1
Nrros	0.00397299	0.460157	0.714	0.228	1	Systemic Venous	Nrros
Rps271	0.0040361	0.402132	1	0.992	1	Systemic Venous	Rps27
Rpl32.1	0.00408567	0.528435	0.857	0.348	1	Systemic Venous	Rpl32.1
Zfp184	0.00410745	0.606041	0.286	0.052	1	Systemic Venous	Zfp184
Mgst1	0.0041399	0.702832	0.429	0.11	1	Systemic Venous	Mgst1
Igf2r	0.00414858	0.62475	0.571	0.181	1	Systemic Venous	Igf2r
Atp5pf	0.00414937	0.533931	1	0.877	1	Systemic Venous	Atp5pf
Lpar4	0.00417855	0.615368	0.429	0.104	1	Systemic Venous	Lpar4
Mcm41	0.00421921	0.495086	0.571	0.161	1	Systemic Venous	Mcm4
Tpt11	0.0043274	0.404836	1	0.988	1	Systemic Venous	Tpt1
Rtn1	0.00445367	0.339473	0.286	0.05	1	Systemic Venous	Rtn1
Pgam1	0.00449928	0.554982	0.857	0.379	1	Systemic Venous	Pgam1
Rpl22	0.00455108	0.521001	1	0.911	1	Systemic Venous	Rpl22
Hsbp1	0.0045514	0.574946	1	0.605	1	Systemic Venous	Hsbp1
Rps111	0.00465547	0.371573	1	0.97	1	Systemic Venous	Rps11
Gusb	0.00475366	0.456116	0.429	0.102	1	Systemic Venous	Gusb
Higd1b1	0.00477529	0.521398	0.571	0.167	1	Systemic Venous	Higd1b
Depp1	0.00479005	0.911715	0.429	0.112	1	Systemic Venous	Depp1
Slc27a6	0.0048342	0.566721	0.286	0.051	1	Systemic Venous	Slc27a6
Rps24	0.00489964	0.379177	1	0.969	1	Systemic Venous	Rps24
Ogfod3	0.00491884	0.49057	0.286	0.053	1	Systemic Venous	Ogfod3
Atp5f1e	0.00498078	0.767926	0.857	0.771	1	Systemic Venous	Atp5f1e
Gimap4	0.00498577	0.683025	1	0.674	1	Systemic Venous	Gimap4
Nme2	0.00510306	0.579122	1	0.774	1	Systemic Venous	Nme2
Nid1	0.00516344	0.755973	0.714	0.307	1	Systemic Venous	Nid1
Dpyd	0.00525246	0.476387	0.143	0.015	1	Systemic Venous	Dpyd
Wnt11	0.0054478	0.418488	0.143	0.015	1	Systemic Venous	Wnt11
Cnot8	0.00554351	0.581724	0.714	0.312	1	Systemic Venous	Cnot8
Tnnt2	0.00579238	0.329884	0.286	0.051	1	Systemic Venous	Tnnt2
Sparcl1	0.00584284	0.833421	0.714	0.311	1	Systemic Venous	Sparcl1
Bgn1	0.00585384	1.2308	0.571	0.226	1	Systemic Venous	Bgn
Srpx	0.00590303	0.763772	0.571	0.193	1	Systemic Venous	Srpx
Rpl18a	0.00592858	0.48112	1	0.902	1	Systemic Venous	Rpl18a
Spata13	0.00600764	0.528895	0.571	0.176	1	Systemic Venous	Spata13
Trpm4	0.00602729	0.255178	0.286	0.051	1	Systemic Venous	Trpm4
Cox6b1.1	0.00606652	0.776176	0.571	0.204	1	Systemic Venous	Cox6b1.1
Copz2	0.00614148	0.522846	0.286	0.054	1	Systemic Venous	Copz2
Gskip	0.00623075	0.589755	0.571	0.185	1	Systemic Venous	Gskip
Rit1	0.00629223	0.613047	0.429	0.117	1	Systemic Venous	Rit1
Lurap1l	0.00631406	0.460998	0.429	0.105	1	Systemic Venous	Lurap1l
Rfx1	0.00638284	0.430442	0.286	0.054	1	Systemic Venous	Rfx1
Arsa	0.00641213	0.676409	0.429	0.12	1	Systemic Venous	Arsa
Rps3	0.00642455	0.507681	1	0.963	1	Systemic Venous	Rps3
S100a11	0.006683	1.02785	1	0.696	1	Systemic Venous	S100a11
Rrs1	0.00669653	0.392307	0.286	0.054	1	Systemic Venous	Rrs1
Rps4x1	0.0068292	0.347068	1	0.975	1	Systemic Venous	Rps4x
Rps10	0.00704196	0.59391	0.571	0.199	1	Systemic Venous	Rps10
Nsrp1	0.00706105	0.515185	1	0.456	1	Systemic Venous	Nsrp1
Nptn	0.00707094	0.457685	0.857	0.406	1	Systemic Venous	Nptn
Ly6l	0.00722876	0.464242	0.143	0.015	1	Systemic Venous	Ly6l
Tor1b	0.00729351	0.633461	0.286	0.058	1	Systemic Venous	Tor1b
Pi4k2b	0.00735404	0.462182	0.143	0.015	1	Systemic Venous	Pi4k2b
Rpl341	0.00747658	0.431468	1	0.962	1	Systemic Venous	Rpl34
Ruvbl2	0.00747956	0.757824	0.429	0.112	1	Systemic Venous	Ruvbl2
Pcdhb10	0.00748127	0.342603	0.143	0.015	1	Systemic Venous	Pcdhb10
Fam129a	0.00748127	0.337333	0.143	0.015	1	Systemic Venous	Fam129a
Mettl1	0.00748127	0.33587	0.143	0.015	1	Systemic Venous	Mettl1
Ptp4a31	0.00762669	0.362726	0.571	0.171	1	Systemic Venous	Ptp4a3
LOC100911851	0.00769927	0.540913	0.286	0.057	1	Systemic Venous	LOC100911851
Marveld1	0.00782895	0.570041	0.429	0.12	1	Systemic Venous	Marveld1
Eif4ebp1	0.00783261	0.342154	0.571	0.169	1	Systemic Venous	Eif4ebp1
Nfx1	0.00802363	0.442622	0.429	0.11	1	Systemic Venous	Nfx1
Arl3	0.0080643	0.663625	0.571	0.193	1	Systemic Venous	Arl3
Ap2m1	0.00812729	0.695941	1	0.61	1	Systemic Venous	Ap2m1
Eno1	0.00823727	0.548965	0.857	0.402	1	Systemic Venous	Eno1
Mlf2	0.00831913	0.623411	0.857	0.475	1	Systemic Venous	Mlf2
Lmcd11	0.00843163	0.311543	0.429	0.108	1	Systemic Venous	Lmcd1
Calm2	0.00860572	0.400804	1	0.904	1	Systemic Venous	Calm2
Htra11	0.00899793	0.828625	0.571	0.215	1	Systemic Venous	Htra1
Yipf3	0.00924372	0.537759	0.571	0.195	1	Systemic Venous	Yipf3
LOC100360449	0.00945086	0.442523	1	0.992	1	Systemic Venous	LOC100360449
Tmem86a	0.00945928	0.616208	0.286	0.06	1	Systemic Venous	Tmem86a
Serpinc1	0.00946078	0.469027	0.143	0.016	1	Systemic Venous	Serpinc1
Mcm21	0.00951519	0.47512	0.429	0.118	1	Systemic Venous	Mcm2
Psmc6	0.00960602	0.689712	1	0.637	1	Systemic Venous	Psmc6
Nvl	0.00970557	0.55438	0.429	0.121	1	Systemic Venous	Nvl
Gja5	2.8092e-118	2.07647	0.793	0.064	5.0928e-114	Arterial	Gja5
Tm4sf1	6.68558e-106	2.84752	0.847	0.113	1.21203e-101	Arterial	Tm4sf1
Fbln21	4.23525e-86	2.28492	0.82	0.132	7.67809e-82	Arterial	Fbln2
Fbln51	2.60706e-81	2.24227	0.873	0.221	4.72633e-77	Arterial	Fbln5
Cxcl12	6.5843e-77	2.00509	0.673	0.085	1.19367e-72	Arterial	Cxcl12
Prdm16	2.6913e-73	0.802979	0.38	0.004	4.87906e-69	Arterial	Prdm16
Kcne3	7.62016e-69	1.19383	0.54	0.049	1.38146e-64	Arterial	Kcne3
Mecom	6.96319e-66	1.213	0.72	0.128	1.26236e-61	Arterial	Mecom
Hey2	7.36992e-62	0.806388	0.333	0.006	1.33609e-57	Arterial	Hey2
Srpx1	1.11414e-61	1.29331	0.667	0.117	2.01983e-57	Arterial	Srpx
Thsd7a	3.40037e-61	0.641831	0.373	0.013	6.16453e-57	Arterial	Thsd7a
Il331	2.3011e-60	1.50797	0.98	0.62	4.17166e-56	Arterial	Il33
Vwf1	2.69403e-58	1.54654	0.947	0.465	4.88401e-54	Arterial	Vwf
Ltbp4	6.48383e-58	1.53573	0.7	0.163	1.17545e-53	Arterial	Ltbp4
Cd24	1.08053e-57	1.02367	0.587	0.086	1.95889e-53	Arterial	Cd24
Anxa31	6.94066e-56	1.47361	0.967	0.516	1.25827e-51	Arterial	Anxa3
Cyp26a1	5.69228e-55	0.706885	0.287	0.003	1.03195e-50	Arterial	Cyp26a1
Adgrg61	7.48481e-55	1.21022	0.72	0.152	1.35692e-50	Arterial	Adgrg6
Col18a1	1.62744e-52	0.876529	0.487	0.055	2.95039e-48	Arterial	Col18a1
Igfbp4	2.32989e-47	1.10506	0.907	0.471	4.22385e-43	Arterial	Igfbp4
Scd2	3.36365e-46	1.14533	0.86	0.402	6.09795e-42	Arterial	Scd2
Wfdc1	1.71839e-45	1.10827	0.907	0.46	3.11526e-41	Arterial	Wfdc1
Nuak11	3.13834e-45	1.0785	0.553	0.103	5.6895e-41	Arterial	Nuak1
Amd1	3.2816e-43	1.58444	0.827	0.398	5.94922e-39	Arterial	Amd1
Msr1	1.18437e-42	0.525645	0.22	0.002	2.14715e-38	Arterial	Msr1
Rnf144a	2.35904e-41	1.12938	0.847	0.412	4.2767e-37	Arterial	Rnf144a
Afap1l2	5.36833e-41	0.440682	0.3	0.019	9.73225e-37	Arterial	Afap1l2
Unc5b	5.90209e-40	0.972495	0.68	0.195	1.06999e-35	Arterial	Unc5b
Depp11	8.04314e-40	0.957589	0.433	0.061	1.45814e-35	Arterial	Depp1
Aldoc	6.15528e-39	0.48587	0.287	0.019	1.11589e-34	Arterial	Aldoc
Vsig1	1.70272e-38	0.476952	0.227	0.007	3.08687e-34	Arterial	Vsig1
Gja4	5.8578e-38	1.05392	0.847	0.416	1.06196e-33	Arterial	Gja4
Eva1c	1.87224e-37	0.47828	0.313	0.028	3.39419e-33	Arterial	Eva1c
Selp	5.0881e-36	0.362433	0.22	0.008	9.22421e-32	Arterial	Selp
Sulf11	5.29375e-36	0.990272	0.54	0.119	9.59704e-32	Arterial	Sulf1
Gata6	2.85351e-35	0.517683	0.333	0.037	5.17312e-31	Arterial	Gata6
Ecm1	6.25604e-35	1.04357	0.68	0.235	1.13416e-30	Arterial	Ecm1
Myl6	1.29394e-33	0.615296	0.993	0.979	2.34578e-29	Arterial	Myl6
Mgp1	2.79804e-33	2.03227	0.66	0.258	5.07256e-29	Arterial	Mgp
Krt2	2.89634e-33	0.424054	0.28	0.025	5.25077e-29	Arterial	Krt2
Ptprz1	3.56986e-33	0.386327	0.207	0.008	6.4718e-29	Arterial	Ptprz1
Htra12	8.22349e-33	0.783936	0.58	0.156	1.49084e-28	Arterial	Htra1
Ldha	1.28244e-32	0.893688	0.893	0.669	2.32494e-28	Arterial	Ldha
S100a4	2.32806e-32	1.14476	0.54	0.146	4.22055e-28	Arterial	S100a4
Bmx	6.86779e-32	0.268415	0.16	0.001	1.24506e-27	Arterial	Bmx
Rbp71	1.01917e-31	0.51501	0.34	0.046	1.84765e-27	Arterial	Rbp7
Egfl8	4.38556e-31	0.30355	0.233	0.016	7.95058e-27	Arterial	Egfl8
Rgs10	6.09361e-31	0.446621	0.32	0.04	1.10471e-26	Arterial	Rgs10
Tst	6.89932e-31	0.514443	0.413	0.074	1.25078e-26	Arterial	Tst
Pcsk5	1.78222e-30	0.60282	0.36	0.056	3.23098e-26	Arterial	Pcsk5
Hs3st3b1	6.70611e-30	0.364186	0.253	0.022	1.21575e-25	Arterial	Hs3st3b1
Atp2a3	1.46961e-29	0.562219	0.487	0.112	2.66426e-25	Arterial	Atp2a3
Tmsb4x1	1.47329e-29	0.438577	1	1	2.67093e-25	Arterial	Tmsb4x
Efnb2	4.0026e-29	0.776106	0.887	0.529	7.25632e-25	Arterial	Efnb2
Sat1	5.70339e-29	1.23429	0.867	0.612	1.03397e-24	Arterial	Sat1
Procr1	6.34945e-29	0.857866	0.593	0.191	1.15109e-24	Arterial	Procr
Cdh131	7.17113e-29	0.549825	0.24	0.021	1.30005e-24	Arterial	Cdh13
Swap70	1.9508e-28	0.530834	0.367	0.065	3.5366e-24	Arterial	Swap70
Atp6v0b	2.18009e-28	0.981175	0.84	0.533	3.95228e-24	Arterial	Atp6v0b
Dkk2	3.79718e-28	0.608399	0.18	0.008	6.88391e-24	Arterial	Dkk2
Tent5a	4.68879e-28	0.415539	0.233	0.02	8.50031e-24	Arterial	Tent5a
Fbn11	1.31791e-27	0.823409	0.66	0.258	2.38924e-23	Arterial	Fbn1
Aif1l1	2.61628e-27	0.389253	0.22	0.018	4.74306e-23	Arterial	Aif1l
Id2	4.43198e-27	0.718685	0.427	0.099	8.03474e-23	Arterial	Id2
Arid5b	6.59268e-27	0.761702	0.707	0.311	1.19519e-22	Arterial	Arid5b
Igf21	2.25521e-26	0.4653	0.26	0.03	4.08846e-22	Arterial	Igf2
Eln1	1.28384e-25	1.48986	0.827	0.479	2.32747e-21	Arterial	Eln
Glod5	1.29496e-25	0.591675	0.307	0.048	2.34763e-21	Arterial	Glod5
Plppr4	2.39286e-25	0.357068	0.167	0.008	4.33802e-21	Arterial	Plppr4
Ptprj1	4.58716e-25	0.571655	0.367	0.075	8.31606e-21	Arterial	Ptprj
Kcnn4	5.1351e-25	0.30706	0.18	0.011	9.30942e-21	Arterial	Kcnn4
Stc1	8.10144e-25	0.651179	0.447	0.118	1.46871e-20	Arterial	Stc1
Sorbs21	8.40077e-25	0.44366	0.267	0.036	1.52298e-20	Arterial	Sorbs2
Ramp1	1.95008e-24	0.444289	0.187	0.013	3.53529e-20	Arterial	Ramp1
Atp1a1	1.72872e-23	0.754785	0.74	0.397	3.13399e-19	Arterial	Atp1a1
Aldh2	2.32063e-23	0.654883	0.54	0.178	4.20708e-19	Arterial	Aldh2
Pgk1	5.98462e-23	1.20269	0.8	0.519	1.08495e-18	Arterial	Pgk1
Cst31	5.4051e-22	0.893424	0.893	0.634	9.79891e-18	Arterial	Cst3
Gpr21	8.84925e-22	0.356161	0.193	0.019	1.60428e-17	Arterial	Gpr21
St6gal1	1.26355e-21	0.444201	0.347	0.076	2.29068e-17	Arterial	St6gal1
Pdlim31	1.40064e-21	0.723515	0.787	0.43	2.53922e-17	Arterial	Pdlim3
Fn1	2.24675e-21	1.02779	0.653	0.324	4.07313e-17	Arterial	Fn1
Lmo7	4.0998e-21	0.406634	0.34	0.074	7.43253e-17	Arterial	Lmo7
Rgs51	4.6381e-21	0.54457	0.567	0.191	8.40841e-17	Arterial	Rgs5
Fblim1	1.13067e-20	0.528146	0.487	0.157	2.0498e-16	Arterial	Fblim1
Myof	1.22357e-20	0.562443	0.26	0.044	2.21821e-16	Arterial	Myof
Fmo2	4.26707e-20	0.272022	0.26	0.043	7.73577e-16	Arterial	Fmo2
Lima1	5.88081e-20	0.370442	0.307	0.064	1.06613e-15	Arterial	Lima1
Rps6ka3	1.95964e-19	0.505303	0.447	0.14	3.55264e-15	Arterial	Rps6ka3
Cd63	6.04278e-19	0.646133	0.88	0.686	1.0955e-14	Arterial	Cd63
Tsc22d1	6.36979e-19	0.698564	0.84	0.57	1.15478e-14	Arterial	Tsc22d1
Pde3a	1.06199e-18	0.388894	0.287	0.059	1.92529e-14	Arterial	Pde3a
Sbspon	1.51735e-18	0.407888	0.14	0.01	2.7508e-14	Arterial	Sbspon
Jag11	2.00992e-18	0.656562	0.593	0.247	3.64378e-14	Arterial	Jag1
Hpse	3.05732e-18	0.333202	0.2	0.028	5.54261e-14	Arterial	Hpse
Fchsd2	3.66381e-18	0.493797	0.493	0.172	6.64212e-14	Arterial	Fchsd2
Nos3	5.11582e-18	0.466181	0.42	0.128	9.27446e-14	Arterial	Nos3
Phlda31	1.35285e-17	0.453336	0.34	0.09	2.45258e-13	Arterial	Phlda3
Plscr11	1.69259e-17	0.415987	0.347	0.092	3.0685e-13	Arterial	Plscr1
Itprid2	3.67875e-17	0.602339	0.373	0.116	6.66921e-13	Arterial	Itprid2
Dst	3.77549e-17	0.601435	0.793	0.538	6.84459e-13	Arterial	Dst
Lama5	3.78757e-17	0.424887	0.387	0.114	6.86648e-13	Arterial	Lama5
Dll4	5.40332e-17	0.586249	0.64	0.295	9.79568e-13	Arterial	Dll4
Tnfaip2	7.74899e-17	0.266766	0.213	0.036	1.40481e-12	Arterial	Tnfaip2
Lcn21	9.68168e-17	0.444266	0.333	0.088	1.75519e-12	Arterial	Lcn2
Arpc1b	1.30783e-16	0.494672	0.887	0.663	2.37097e-12	Arterial	Arpc1b
Id1	1.46805e-16	0.593848	0.887	0.715	2.66143e-12	Arterial	Id1
Fam135a	1.99417e-16	0.567043	0.527	0.222	3.61524e-12	Arterial	Fam135a
Azin1	2.05111e-16	0.558045	0.78	0.45	3.71846e-12	Arterial	Azin1
P4ha2	3.78814e-16	0.28073	0.253	0.053	6.86751e-12	Arterial	P4ha2
Isg20	4.31962e-16	0.252422	0.307	0.076	7.83103e-12	Arterial	Isg20
Smad7	5.20462e-16	0.549588	0.707	0.375	9.43545e-12	Arterial	Smad7
Cdk19	6.39113e-16	0.513741	0.5	0.207	1.15865e-11	Arterial	Cdk19
AABR07025295.11	6.61025e-16	0.316709	0.267	0.061	1.19837e-11	Arterial	AABR07025295.1
Rftn1	9.95862e-16	0.458962	0.407	0.139	1.8054e-11	Arterial	Rftn1
Rassf91	1.03895e-15	0.343654	0.42	0.134	1.88351e-11	Arterial	Rassf9
Abi3bp1	1.45554e-15	0.37952	0.5	0.184	2.63875e-11	Arterial	Abi3bp
Pld1	1.71583e-15	0.305332	0.233	0.048	3.11063e-11	Arterial	Pld1
AABR07021704.1	1.80732e-15	0.373812	0.38	0.122	3.27649e-11	Arterial	AABR07021704.1
Cyp26b1	1.8347e-15	0.529692	0.613	0.282	3.32613e-11	Arterial	Cyp26b1
Grem2	2.41358e-15	0.376752	0.187	0.03	4.37559e-11	Arterial	Grem2
Sox17	2.59538e-15	0.600713	0.747	0.439	4.70516e-11	Arterial	Sox17
Lox	3.30709e-15	0.683848	0.26	0.063	5.99542e-11	Arterial	Lox
Cmip1	5.72711e-15	0.339406	0.36	0.113	1.03827e-10	Arterial	Cmip
LOC1009102701	6.66817e-15	0.821979	0.353	0.114	1.20887e-10	Arterial	LOC100910270
Pxylp1	7.62492e-15	0.260305	0.16	0.022	1.38232e-10	Arterial	Pxylp1
LOC691143	8.37704e-15	0.529632	0.347	0.113	1.51867e-10	Arterial	LOC691143
Cdc42ep31	1.06644e-14	0.549467	0.527	0.228	1.93335e-10	Arterial	Cdc42ep3
Tmem255b2	1.23392e-14	0.328082	0.307	0.085	2.23698e-10	Arterial	Tmem255b
Sdc1	1.31308e-14	0.278278	0.22	0.046	2.38048e-10	Arterial	Sdc1
Hmcn1	1.40515e-14	0.698659	0.747	0.504	2.54739e-10	Arterial	Hmcn1
Pmepa1	1.74035e-14	0.335344	0.293	0.08	3.15509e-10	Arterial	Pmepa1
Atp1b3	2.81349e-14	0.551797	0.773	0.533	5.10058e-10	Arterial	Atp1b3
Hscb	5.28792e-14	0.551152	0.54	0.254	9.58646e-10	Arterial	Hscb
Fibin	7.18113e-14	0.334597	0.207	0.042	1.30187e-09	Arterial	Fibin
Furin	2.69222e-13	0.420039	0.42	0.164	4.88073e-09	Arterial	Furin
Cd91	3.33207e-13	0.434405	0.967	0.973	6.04071e-09	Arterial	Cd9
Ptprb1	4.00411e-13	0.481572	0.827	0.611	7.25905e-09	Arterial	Ptprb
Dhh1	4.24356e-13	0.261051	0.307	0.091	7.69314e-09	Arterial	Dhh
Man2a11	4.4737e-13	0.496002	0.72	0.416	8.11037e-09	Arterial	Man2a1
Ctsd1	4.6016e-13	0.532727	0.72	0.413	8.34225e-09	Arterial	Ctsd
Notch1	5.19236e-13	0.547574	0.813	0.624	9.41322e-09	Arterial	Notch1
Pctp	9.0581e-13	0.308443	0.267	0.073	1.64214e-08	Arterial	Pctp
Fzd61	1.37254e-12	0.513475	0.44	0.196	2.48828e-08	Arterial	Fzd6
Mxi1	1.39657e-12	0.260391	0.247	0.064	2.53185e-08	Arterial	Mxi1
Enpp31	1.57649e-12	0.300335	0.16	0.028	2.85801e-08	Arterial	Enpp3
Vegfa	2.80391e-12	0.357191	0.593	0.275	5.08321e-08	Arterial	Vegfa
Vcan1	5.46394e-12	0.589529	0.307	0.103	9.90557e-08	Arterial	Vcan
Pdlim7	1.3116e-11	0.362354	0.36	0.135	2.37781e-07	Arterial	Pdlim7
Cd82	1.34117e-11	0.370056	0.313	0.105	2.43141e-07	Arterial	Cd82
Hist1h2bcl1	1.70065e-11	0.290452	0.327	0.111	3.0831e-07	Arterial	Hist1h2bcl1
Notch4	1.88129e-11	0.390946	0.387	0.146	3.41059e-07	Arterial	Notch4
Slc38a2	2.38646e-11	0.422048	0.74	0.447	4.32641e-07	Arterial	Slc38a2
Sms	3.31292e-11	0.470229	0.5	0.241	6.00599e-07	Arterial	Sms
Fcgrt1	5.25716e-11	0.400938	0.46	0.205	9.53071e-07	Arterial	Fcgrt
Nfia	5.87864e-11	0.506709	0.7	0.467	1.06574e-06	Arterial	Nfia
Tek	7.43876e-11	0.417269	0.82	0.633	1.34857e-06	Arterial	Tek
Hspa5	7.9665e-11	0.45272	0.9	0.827	1.44425e-06	Arterial	Hspa5
Rcn2	1.22267e-10	0.429462	0.533	0.277	2.21659e-06	Arterial	Rcn2
Sox13	1.32057e-10	0.368217	0.487	0.227	2.39406e-06	Arterial	Sox13
Mmp21	1.5656e-10	0.418294	0.54	0.279	2.83828e-06	Arterial	Mmp2
Parvb	2.13393e-10	0.351138	0.5	0.236	3.86861e-06	Arterial	Parvb
Ptprf	2.24959e-10	0.39721	0.367	0.148	4.07828e-06	Arterial	Ptprf
B4galt4	2.53227e-10	0.2578	0.227	0.066	4.59076e-06	Arterial	B4galt4
Nrarp	2.86358e-10	0.331522	0.473	0.224	5.19138e-06	Arterial	Nrarp
Rabgap1	9.36078e-10	0.352507	0.533	0.277	1.69702e-05	Arterial	Rabgap1
Txnip	1.04719e-09	0.402763	0.807	0.659	1.89846e-05	Arterial	Txnip
Chit1	1.17184e-09	0.433664	0.573	0.3	2.12442e-05	Arterial	Chit1
Mageh1	1.29269e-09	0.494451	0.487	0.255	2.34352e-05	Arterial	Mageh1
Ctsh	1.52857e-09	0.452817	0.573	0.325	2.77114e-05	Arterial	Ctsh
Apoe	1.54314e-09	0.334082	0.453	0.204	2.79755e-05	Arterial	Apoe
Tgfb21	1.54353e-09	0.43155	0.433	0.207	2.79827e-05	Arterial	Tgfb2
Efna1	2.2887e-09	0.47767	0.593	0.369	4.14918e-05	Arterial	Efna1
Cytl1	2.44678e-09	0.262201	0.187	0.052	4.43577e-05	Arterial	Cytl1
Mrps26	6.45841e-09	0.301683	0.407	0.186	0.000117085	Arterial	Mrps26
Bmp41	7.44558e-09	0.395552	0.407	0.191	0.000134981	Arterial	Bmp4
Grn	8.27768e-09	0.437831	0.727	0.53	0.000150066	Arterial	Grn
Rfk	1.49765e-08	0.363886	0.32	0.139	0.000271509	Arterial	Rfk
Rgs3	1.5616e-08	0.295952	0.48	0.249	0.000283102	Arterial	Rgs3
Dnase2	1.5624e-08	0.329349	0.313	0.13	0.000283248	Arterial	Dnase2
Arg1	1.96096e-08	0.280751	0.127	0.028	0.000355503	Arterial	Arg1
Plpp1	2.31808e-08	0.393699	0.6	0.373	0.000420245	Arterial	Plpp1
Itpr3	2.42339e-08	0.321508	0.233	0.082	0.000439337	Arterial	Itpr3
Enc1	2.58787e-08	0.370126	0.38	0.183	0.000469155	Arterial	Enc1
Golim4	2.70314e-08	0.416394	0.447	0.232	0.000490052	Arterial	Golim4
Sec14l1	4.24751e-08	0.395652	0.54	0.331	0.000770031	Arterial	Sec14l1
Specc11	4.42427e-08	0.289514	0.32	0.139	0.000802076	Arterial	Specc1
Kctd10	5.40337e-08	0.293317	0.393	0.19	0.000979577	Arterial	Kctd10
Btg21	5.79044e-08	0.402828	0.727	0.536	0.00104975	Arterial	Btg2
Aldoa	6.04697e-08	0.316002	0.707	0.449	0.00109625	Arterial	Aldoa
Gls	7.15677e-08	0.297407	0.427	0.211	0.00129745	Arterial	Gls
Galnt2	7.46594e-08	0.307616	0.387	0.184	0.0013535	Arterial	Galnt2
Tacc2	7.88176e-08	0.292382	0.267	0.105	0.00142888	Arterial	Tacc2
Actn11	8.47328e-08	0.292225	0.413	0.207	0.00153612	Arterial	Actn1
Zyx	9.16941e-08	0.314657	0.4	0.199	0.00166232	Arterial	Zyx
Krt79	9.8038e-08	0.358962	0.34	0.155	0.00177733	Arterial	Krt79
Rhob	9.94759e-08	0.377301	0.687	0.474	0.0018034	Arterial	Rhob
Nudt41	1.32714e-07	0.34514	0.74	0.55	0.00240598	Arterial	Nudt4
Fkbp7	1.3476e-07	0.335482	0.5	0.282	0.00244306	Arterial	Fkbp7
Tspan7	1.36813e-07	0.342347	0.94	0.847	0.00248028	Arterial	Tspan7
Mmrn2	1.53172e-07	0.375475	0.58	0.357	0.00277686	Arterial	Mmrn2
Lamb2	2.33789e-07	0.282982	0.493	0.274	0.00423835	Arterial	Lamb2
Nid11	2.62046e-07	0.359701	0.5	0.277	0.00475063	Arterial	Nid1
Tnfaip8	2.94577e-07	0.278722	0.227	0.086	0.00534039	Arterial	Tnfaip8
Aif1	4.14088e-07	0.270828	0.133	0.036	0.00750701	Arterial	Aif1
Krtcap2	4.80101e-07	0.356772	0.687	0.507	0.00870376	Arterial	Krtcap2
Flna	5.15536e-07	0.29064	0.58	0.36	0.00934614	Arterial	Flna
Cxcr4	7.43835e-07	0.28398	0.467	0.259	0.013485	Arterial	Cxcr4
Plat1	1.01366e-06	0.582521	0.62	0.457	0.0183767	Arterial	Plat
Ces2	1.10236e-06	0.2762	0.367	0.185	0.0199847	Arterial	Ces2
Calr	2.28554e-06	0.27653	0.913	0.838	0.0414346	Arterial	Calr
Pdia4	2.46102e-06	0.26233	0.48	0.272	0.0446159	Arterial	Pdia4
Hipk2	2.90245e-06	0.368074	0.553	0.369	0.0526185	Arterial	Hipk2
Iqgap1	3.42473e-06	0.287534	0.54	0.332	0.062087	Arterial	Iqgap1
Col5a21	4.07678e-06	0.318736	0.773	0.579	0.0739079	Arterial	Col5a2
Dab2ip	4.26278e-06	0.283831	0.32	0.158	0.0772799	Arterial	Dab2ip
Eng	4.8886e-06	0.317867	0.78	0.658	0.0886254	Arterial	Eng
Gstp1	5.20564e-06	0.309336	0.833	0.744	0.094373	Arterial	Gstp1
Pdia3	6.25099e-06	0.26669	0.82	0.694	0.113324	Arterial	Pdia3
Phc2	6.83275e-06	0.25612	0.4	0.22	0.123871	Arterial	Phc2
Tnks1bp1	7.08787e-06	0.262742	0.38	0.201	0.128496	Arterial	Tnks1bp1
Ece11	7.26003e-06	0.324306	0.707	0.512	0.131617	Arterial	Ece1
Timp1	1.47456e-05	0.300505	0.707	0.55	0.267323	Arterial	Timp1
Apol31	1.54615e-05	0.273166	0.667	0.48	0.280302	Arterial	Apol3
Tmsb15b2	2.0732e-05	0.269018	0.547	0.358	0.375851	Arterial	Tmsb15b2
Riok3	2.24862e-05	0.282894	0.44	0.262	0.407653	Arterial	Riok3
Fstl1	2.56517e-05	0.250529	0.873	0.792	0.46504	Arterial	Fstl1
Naaa	2.68511e-05	0.298673	0.147	0.054	0.486784	Arterial	Naaa
Pdia5	3.30334e-05	0.256498	0.247	0.119	0.598863	Arterial	Pdia5
Hsp90b1	4.7309e-05	0.266025	0.92	0.883	0.857665	Arterial	Hsp90b1
Nedd9	6.4257e-05	0.296006	0.567	0.388	1	Arterial	Nedd9
AC134224.11	6.4653e-05	0.426937	0.787	0.707	1	Arterial	AC134224.1
Eef21	7.78925e-05	0.275352	0.827	0.689	1	Arterial	Eef2
Mdk1	0.000104324	0.269878	0.267	0.143	1	Arterial	Mdk
Cthrc11	0.000150444	0.354345	0.16	0.067	1	Arterial	Cthrc1
Cgnl1	0.000246302	0.353397	0.167	0.076	1	Arterial	Cgnl1
Tyrobp	0.000729684	0.405701	0.133	0.059	1	Arterial	Tyrobp
Hba-a1	0.00399586	0.766511	1	0.988	1	Arterial	Hba-a1
Ccl6	0.0042769	0.446714	0.153	0.081	1	Arterial	Ccl6
Ccdc80	0.00840026	0.270556	0.16	0.091	1	Arterial	Ccdc80
Ptx3	1.76742e-200	2.18703	0.909	0.001	3.20416e-196	Lymphatic	Ptx3
Mmrn1	4.15898e-199	2.63063	1	0.005	7.53982e-195	Lymphatic	Mmrn1
Scn3a	1.93435e-179	1.37448	0.818	0.001	3.50678e-175	Lymphatic	Scn3a
Prox1	6.31641e-173	1.85189	0.909	0.006	1.1451e-168	Lymphatic	Prox1
Reln	3.02087e-172	1.52144	0.788	0.001	5.47654e-168	Lymphatic	Reln
Meox1	8.86743e-172	1.36223	0.788	0.001	1.60758e-167	Lymphatic	Meox1
Shisal1	3.88228e-151	0.931846	0.667	0	7.03819e-147	Lymphatic	Shisal1
Adgrg3	3.88228e-151	0.844968	0.667	0	7.03819e-147	Lymphatic	Adgrg3
Gria2	1.78424e-144	1.50181	0.697	0.002	3.23465e-140	Lymphatic	Gria2
Sema3d	9.92599e-143	1.18679	0.818	0.008	1.79948e-138	Lymphatic	Sema3d
Tbx1	1.0416e-137	0.694519	0.636	0.001	1.88831e-133	Lymphatic	Tbx1
Lrg11	2.21542e-126	1.75931	0.818	0.013	4.01634e-122	Lymphatic	Lrg1
Sh3gl3	1.21149e-124	0.584951	0.606	0.002	2.19631e-120	Lymphatic	Sh3gl3
Grin2b	6.05215e-124	0.714951	0.576	0.001	1.09719e-119	Lymphatic	Grin2b
Ccl24	1.64019e-123	1.01634	0.576	0.001	2.9735e-119	Lymphatic	Ccl24
Mrc1	7.85807e-121	1.91914	0.939	0.024	1.42459e-116	Lymphatic	Mrc1
Prkcz	2.94632e-120	0.611552	0.636	0.004	5.34138e-116	Lymphatic	Prkcz
Lrrn4cl	7.5125e-118	1.00389	0.667	0.006	1.36194e-113	Lymphatic	Lrrn4cl
Igsf3	1.24303e-112	1.01233	0.788	0.015	2.25349e-108	Lymphatic	Igsf3
Slc45a3	5.20688e-110	0.738217	0.515	0.001	9.43955e-106	Lymphatic	Slc45a3
Scn1b	9.86253e-103	0.775755	0.576	0.005	1.78798e-98	Lymphatic	Scn1b
Ccl21	1.6948e-99	5.3022	1	0.047	3.0725e-95	Lymphatic	Ccl21
AABR07050652.1	4.97601e-97	0.628035	0.485	0.002	9.02101e-93	Lymphatic	AABR07050652.1
Osr1	5.86141e-97	0.532997	0.485	0.002	1.06261e-92	Lymphatic	Osr1
AABR07063279.1	1.61673e-96	0.849504	0.697	0.014	2.93097e-92	Lymphatic	AABR07063279.1
Spsb1	1.60703e-93	0.730056	0.606	0.009	2.91338e-89	Lymphatic	Spsb1
Tfpi2	1.09229e-91	0.73126	0.545	0.006	1.98021e-87	Lymphatic	Tfpi2
Ephb1	2.43637e-91	0.636454	0.576	0.008	4.41689e-87	Lymphatic	Ephb1
Tnfrsf11a	4.9024e-90	1.38153	0.879	0.035	8.88757e-86	Lymphatic	Tnfrsf11a
Nav3	5.75014e-89	0.706395	0.515	0.005	1.04244e-84	Lymphatic	Nav3
Igfbpl1	3.18935e-85	0.892796	0.515	0.006	5.78197e-81	Lymphatic	Igfbpl1
Col8a2	6.59293e-84	0.440138	0.424	0.002	1.19523e-79	Lymphatic	Col8a2
Dusp2	1.30633e-81	0.669177	0.606	0.013	2.36825e-77	Lymphatic	Dusp2
Tnfaip8l3	3.61347e-81	0.499213	0.515	0.007	6.55085e-77	Lymphatic	Tnfaip8l3
Gprc5b1	5.64462e-81	0.692055	0.545	0.009	1.02331e-76	Lymphatic	Gprc5b
Apba2	6.65333e-81	0.572942	0.576	0.011	1.20618e-76	Lymphatic	Apba2
Plce1	1.09904e-78	0.317294	0.424	0.003	1.99245e-74	Lymphatic	Plce1
Cst6	1.16812e-77	1.43725	0.909	0.05	2.11769e-73	Lymphatic	Cst6
Il18	1.67478e-77	0.816111	0.697	0.022	3.0362e-73	Lymphatic	Il18
Mpp7	8.21116e-76	0.672722	0.545	0.011	1.4886e-71	Lymphatic	Mpp7
Slc38a4	1.794e-75	0.76365	0.515	0.009	3.25234e-71	Lymphatic	Slc38a4
Maf	1.08778e-74	0.573608	0.545	0.011	1.97204e-70	Lymphatic	Maf
Trpc3	2.59472e-74	0.465609	0.424	0.004	4.70398e-70	Lymphatic	Trpc3
Lrrc17	2.60178e-71	0.518737	0.515	0.01	4.71677e-67	Lymphatic	Lrrc17
Clic21	1.04091e-69	0.982564	0.697	0.027	1.88706e-65	Lymphatic	Clic2
Egln3	1.14378e-69	0.581346	0.515	0.011	2.07356e-65	Lymphatic	Egln3
Ch25h	2.75698e-69	0.64676	0.455	0.007	4.99813e-65	Lymphatic	Ch25h
Flnc	5.36758e-69	0.595097	0.455	0.007	9.73088e-65	Lymphatic	Flnc
AABR07044388.2	9.44401e-69	0.456619	0.515	0.011	1.7121e-64	Lymphatic	AABR07044388.2
Igf1	3.15995e-67	1.68898	0.909	0.062	5.72867e-63	Lymphatic	Igf1
Dapk2	7.23146e-67	0.938372	0.697	0.03	1.31099e-62	Lymphatic	Dapk2
Nrp21	1.63769e-66	2.18448	1	0.09	2.96897e-62	Lymphatic	Nrp2
Cyp4b1	1.98963e-66	0.865295	0.727	0.033	3.607e-62	Lymphatic	Cyp4b1
Gprc5c	2.25054e-66	0.450912	0.424	0.006	4.08e-62	Lymphatic	Gprc5c
Slc9a9	3.98235e-66	0.681155	0.606	0.02	7.21961e-62	Lymphatic	Slc9a9
Gja1	7.48305e-64	2.16989	0.939	0.079	1.3566e-59	Lymphatic	Gja1
Hivep3	8.93999e-64	0.94923	0.667	0.028	1.62073e-59	Lymphatic	Hivep3
Layn	2.28236e-60	1.09001	0.788	0.049	4.13769e-56	Lymphatic	Layn
Pdpn	1.41048e-59	1.52127	0.97	0.088	2.55707e-55	Lymphatic	Pdpn
Fgl21	2.13134e-59	1.60218	0.818	0.055	3.86391e-55	Lymphatic	Fgl2
Cpne7	6.28879e-59	0.296986	0.333	0.003	1.1401e-54	Lymphatic	Cpne7
Plekha4	3.96255e-57	0.263189	0.303	0.002	7.18371e-53	Lymphatic	Plekha4
Cped1	1.14288e-56	0.814389	0.636	0.03	2.07192e-52	Lymphatic	Cped1
Btnl91	9.97249e-56	0.260113	0.273	0.001	1.80791e-51	Lymphatic	Btnl9
Il2ra	1.49722e-54	0.282507	0.333	0.004	2.71431e-50	Lymphatic	Il2ra
Ifi27l2b	1.86944e-53	1.14676	0.697	0.043	3.3891e-49	Lymphatic	Ifi27l2b
Pgf	1.25944e-52	0.294024	0.303	0.003	2.28324e-48	Lymphatic	Pgf
Susd2	6.1906e-52	0.497694	0.455	0.014	1.12229e-47	Lymphatic	Susd2
Bco2	3.27659e-51	0.383178	0.333	0.005	5.94013e-47	Lymphatic	Bco2
Ppef2	4.73308e-51	0.344618	0.455	0.014	8.5806e-47	Lymphatic	Ppef2
Cdkl11	6.30716e-51	0.490147	0.515	0.02	1.14343e-46	Lymphatic	Cdkl1
Dsp	4.74494e-50	0.915955	0.636	0.037	8.60211e-46	Lymphatic	Dsp
Flt4	3.37555e-49	1.75962	0.939	0.111	6.11954e-45	Lymphatic	Flt4
Slc43a2	3.48467e-49	0.501678	0.545	0.025	6.31736e-45	Lymphatic	Slc43a2
Adamts15	2.08127e-48	0.301734	0.303	0.004	3.77313e-44	Lymphatic	Adamts15
Syt6	4.84274e-48	0.342628	0.333	0.006	8.77941e-44	Lymphatic	Syt6
Ralgps2	7.39176e-48	0.367144	0.424	0.013	1.34005e-43	Lymphatic	Ralgps2
Samd9	8.74615e-48	0.397634	0.455	0.016	1.58559e-43	Lymphatic	Samd9
Ccdc801	1.07651e-47	1.57007	0.818	0.077	1.9516e-43	Lymphatic	Ccdc80
Tc2n1	3.60177e-46	1.15332	0.788	0.07	6.52966e-42	Lymphatic	Tc2n
Il16	4.95058e-46	0.362156	0.364	0.009	8.97491e-42	Lymphatic	Il16
Sulf21	6.29352e-46	0.654381	0.727	0.054	1.14095e-41	Lymphatic	Sulf2
Notch2	8.73753e-46	0.54804	0.576	0.032	1.58403e-41	Lymphatic	Notch2
AABR07040412.1	5.12712e-45	0.393999	0.394	0.012	9.29495e-41	Lymphatic	AABR07040412.1
Prkar2b	1.00492e-44	0.395964	0.424	0.015	1.82182e-40	Lymphatic	Prkar2b
AABR07025527.1	3.5161e-43	0.617969	0.485	0.023	6.37435e-39	Lymphatic	AABR07025527.1
Stim1	6.08676e-43	0.460959	0.515	0.027	1.10347e-38	Lymphatic	Stim1
Gpm6a	1.83587e-42	0.785983	0.485	0.024	3.32824e-38	Lymphatic	Gpm6a
Nr2f21	3.62827e-42	1.15808	0.879	0.098	6.57769e-38	Lymphatic	Nr2f2
Flrt2	6.59087e-42	0.450547	0.515	0.028	1.19486e-37	Lymphatic	Flrt2
Klhl41	1.09636e-41	1.45904	0.879	0.104	1.98758e-37	Lymphatic	Klhl4
Fam124a	2.04457e-41	0.386294	0.485	0.024	3.70661e-37	Lymphatic	Fam124a
Trpc6	2.26482e-41	0.2982	0.364	0.011	4.10589e-37	Lymphatic	Trpc6
Synj2	2.05678e-40	0.329857	0.424	0.018	3.72874e-36	Lymphatic	Synj2
Dlgap1	2.37139e-39	0.278029	0.303	0.007	4.2991e-35	Lymphatic	Dlgap1
Timp3	3.32163e-39	1.12544	0.758	0.078	6.02177e-35	Lymphatic	Timp3
Col18a11	4.0133e-39	0.95181	0.848	0.093	7.2757e-35	Lymphatic	Col18a1
Flrt3	9.67596e-39	0.614613	0.485	0.027	1.75416e-34	Lymphatic	Flrt3
Pde2a1	3.93673e-37	0.788699	0.606	0.049	7.1369e-33	Lymphatic	Pde2a
Arg11	5.37459e-37	0.464679	0.485	0.028	9.7436e-33	Lymphatic	Arg1
Smpdl3a	2.71718e-36	0.330619	0.364	0.014	4.92598e-32	Lymphatic	Smpdl3a
Smad1	7.38359e-36	1.44661	0.939	0.169	1.33857e-31	Lymphatic	Smad1
Nnat	1.14513e-35	1.12054	0.576	0.047	2.07601e-31	Lymphatic	Nnat
Hmox1	1.70322e-35	0.365544	0.455	0.025	3.08776e-31	Lymphatic	Hmox1
Smyd2	7.85014e-35	0.694	0.606	0.052	1.42315e-30	Lymphatic	Smyd2
Chst11	2.21687e-34	0.448007	0.545	0.04	4.01897e-30	Lymphatic	Chst1
Mmp14	2.71699e-34	1.1597	0.939	0.153	4.92564e-30	Lymphatic	Mmp14
2021-09-01	4.20278e-34	0.388659	0.394	0.019	7.61923e-30	Lymphatic	2021-09-01
Dab2	7.94103e-34	0.822397	0.636	0.062	1.43963e-29	Lymphatic	Dab2
Map7d2	1.20486e-33	0.280805	0.242	0.005	2.1843e-29	Lymphatic	Map7d2
Gjc2	1.75875e-33	0.496356	0.333	0.013	3.18843e-29	Lymphatic	Gjc2
Ccdc141	1.98354e-33	0.318044	0.364	0.016	3.59595e-29	Lymphatic	Ccdc141
Cxcl1	2.19077e-33	0.553302	0.333	0.013	3.97165e-29	Lymphatic	Cxcl1
Kcnmb2	2.88165e-33	0.271189	0.333	0.013	5.22414e-29	Lymphatic	Kcnmb2
Lbp	4.90824e-33	0.772385	0.455	0.029	8.89815e-29	Lymphatic	Lbp
Tspan5	2.5507e-32	0.600322	0.545	0.045	4.62416e-28	Lymphatic	Tspan5
Gsap	1.07504e-31	0.296802	0.394	0.021	1.94894e-27	Lymphatic	Gsap
Arl6	1.46382e-31	0.354695	0.455	0.03	2.65376e-27	Lymphatic	Arl6
Fam107b	6.52583e-31	0.494278	0.606	0.058	1.18307e-26	Lymphatic	Fam107b
Rab20	1.34565e-30	0.339774	0.333	0.015	2.43953e-26	Lymphatic	Rab20
Ndrg11	5.11208e-30	0.650434	0.545	0.05	9.26769e-26	Lymphatic	Ndrg1
Ctdspl	5.26921e-30	0.681694	0.727	0.09	9.55255e-26	Lymphatic	Ctdspl
Serpine21	1.33489e-29	1.01808	0.758	0.108	2.42003e-25	Lymphatic	Serpine2
Pdgfa	1.99954e-29	0.604793	0.515	0.045	3.62497e-25	Lymphatic	Pdgfa
Lamb1	2.72552e-29	0.830106	0.636	0.071	4.94109e-25	Lymphatic	Lamb1
Fam53b	5.71223e-29	0.466521	0.515	0.044	1.03557e-24	Lymphatic	Fam53b
Emilin1	2.84644e-28	0.856008	0.727	0.098	5.16031e-24	Lymphatic	Emilin1
Arpp21	4.57843e-28	0.334095	0.333	0.017	8.30024e-24	Lymphatic	Arpp21
Zfpm21	1.47533e-27	0.52856	0.485	0.042	2.67462e-23	Lymphatic	Zfpm2
Zfp5211	2.74701e-27	0.790288	0.727	0.1	4.98005e-23	Lymphatic	Zfp521
Rgs161	4.12191e-27	0.469854	0.333	0.018	7.47261e-23	Lymphatic	Rgs16
Sspn	4.37628e-27	0.448959	0.424	0.032	7.93376e-23	Lymphatic	Sspn
Map7	5.39438e-27	0.251941	0.333	0.018	9.77947e-23	Lymphatic	Map7
Serpinb6b1	9.61995e-27	0.4263	0.424	0.032	1.744e-22	Lymphatic	Serpinb6b
Kank1	1.22618e-26	0.324417	0.455	0.037	2.22293e-22	Lymphatic	Kank1
Mdfi	1.71462e-26	0.561735	0.606	0.068	3.10844e-22	Lymphatic	Mdfi
Sh3glb21	2.24493e-26	0.596943	0.606	0.071	4.06983e-22	Lymphatic	Sh3glb2
Ttc9	2.29212e-26	0.405454	0.424	0.033	4.15538e-22	Lymphatic	Ttc9
Dennd2a	3.84363e-26	0.468056	0.515	0.05	6.96812e-22	Lymphatic	Dennd2a
Ifit1bl	4.01246e-26	0.307708	0.303	0.015	7.27419e-22	Lymphatic	Ifit1bl
Slco2b11	9.47503e-26	0.875784	0.576	0.066	1.71773e-21	Lymphatic	Slco2b1
Epdr1	4.54988e-25	0.279165	0.333	0.02	8.24848e-21	Lymphatic	Epdr1
Ston2	4.66265e-25	0.263064	0.364	0.024	8.45292e-21	Lymphatic	Ston2
Cxxc5	6.12458e-25	0.472495	0.485	0.048	1.11033e-20	Lymphatic	Cxxc5
Prkag2	8.03924e-25	0.319969	0.424	0.035	1.45743e-20	Lymphatic	Prkag2
Tril1	9.28404e-25	0.840835	0.576	0.071	1.6831e-20	Lymphatic	Tril
Ptgr1	9.80925e-24	0.395385	0.485	0.048	1.77832e-19	Lymphatic	Ptgr1
Galnt1	1.6173e-23	0.375794	0.364	0.027	2.93201e-19	Lymphatic	Galnt1
Dysf	4.60615e-23	0.812393	0.727	0.12	8.35048e-19	Lymphatic	Dysf
Apold11	1.20254e-22	0.738614	0.515	0.061	2.18008e-18	Lymphatic	Apold1
Ifit2	1.4202e-22	0.665797	0.818	0.146	2.57468e-18	Lymphatic	Ifit2
Rnf182	1.88932e-22	0.296046	0.182	0.005	3.42514e-18	Lymphatic	Rnf182
Foxred2	2.29742e-22	0.297142	0.303	0.019	4.16499e-18	Lymphatic	Foxred2
Ccdc88c1	2.98163e-22	0.481677	0.333	0.024	5.4054e-18	Lymphatic	Ccdc88c
Hid1	3.02657e-22	0.308644	0.394	0.034	5.48686e-18	Lymphatic	Hid1
Lcn22	3.17631e-22	0.941446	0.667	0.105	5.75834e-18	Lymphatic	Lcn2
Mctp11	3.91704e-22	0.374864	0.212	0.008	7.10119e-18	Lymphatic	Mctp1
Kctd17	4.31097e-22	0.289881	0.333	0.024	7.81536e-18	Lymphatic	Kctd17
Mgst11	5.12081e-22	0.775422	0.636	0.095	9.28351e-18	Lymphatic	Mgst1
Micall1	6.31434e-22	0.40895	0.606	0.082	1.14473e-17	Lymphatic	Micall1
Pcsk6	8.96804e-22	0.304794	0.394	0.035	1.62582e-17	Lymphatic	Pcsk6
Ppfibp1	1.29617e-21	1.2282	0.939	0.305	2.34982e-17	Lymphatic	Ppfibp1
Cmtm7	1.36895e-21	0.634923	0.667	0.107	2.48176e-17	Lymphatic	Cmtm7
Tgfbr2	1.58815e-21	0.603441	0.606	0.086	2.87915e-17	Lymphatic	Tgfbr2
Pacsin3	2.39038e-21	0.264461	0.333	0.025	4.33352e-17	Lymphatic	Pacsin3
Clu1	6.59099e-21	0.330198	0.758	0.125	1.19488e-16	Lymphatic	Clu
Abca1	7.92991e-21	0.67339	0.697	0.121	1.43761e-16	Lymphatic	Abca1
Mpp6	1.27948e-20	0.287998	0.394	0.037	2.31957e-16	Lymphatic	Mpp6
Ttc27	1.28472e-20	0.424011	0.576	0.079	2.32907e-16	Lymphatic	Ttc27
Slc40a1.1	1.58243e-20	0.259693	0.364	0.031	2.86878e-16	Lymphatic	Slc40a1.1
Peak1	1.58301e-20	0.569092	0.606	0.091	2.86985e-16	Lymphatic	Peak1
Tox1	2.02467e-20	0.264627	0.333	0.026	3.67053e-16	Lymphatic	Tox
Tpd52	2.09051e-20	0.304651	0.485	0.057	3.78989e-16	Lymphatic	Tpd52
B3gnt21	2.72305e-20	0.763077	0.727	0.141	4.93661e-16	Lymphatic	B3gnt2
Actn12	2.84226e-20	0.889127	0.848	0.216	5.15272e-16	Lymphatic	Actn1
Spry11	5.62581e-20	0.300785	0.576	0.078	1.0199e-15	Lymphatic	Spry1
Nectin2	7.40463e-20	0.755173	0.848	0.199	1.34239e-15	Lymphatic	Nectin2
Pkhd1l11	8.41481e-20	0.344944	0.303	0.022	1.52552e-15	Lymphatic	Pkhd1l1
Adamts12	1.085e-19	0.463065	0.545	0.074	1.96699e-15	Lymphatic	Adamts12
Abi3bp2	1.10306e-19	0.951191	0.879	0.208	1.99973e-15	Lymphatic	Abi3bp
Magi1	1.17926e-19	0.26591	0.394	0.039	2.13788e-15	Lymphatic	Magi1
Slc31a2	1.59772e-19	0.600825	0.697	0.122	2.89651e-15	Lymphatic	Slc31a2
Fosb2	2.24061e-19	1.56127	0.667	0.136	4.06201e-15	Lymphatic	Fosb
Metap1d	2.81904e-19	0.273757	0.333	0.028	5.11064e-15	Lymphatic	Metap1d
Cstb	3.70405e-19	1.65731	0.939	0.502	6.71508e-15	Lymphatic	Cstb
Arl4a1	4.46232e-19	1.24838	0.909	0.295	8.08974e-15	Lymphatic	Arl4a
LOC1003644351	4.57271e-19	1.16261	1	0.982	8.28987e-15	Lymphatic	LOC100364435
Timp2	7.25048e-19	0.752811	0.758	0.158	1.31444e-14	Lymphatic	Timp2
Angpt2	1.10666e-18	0.38709	0.364	0.035	2.00626e-14	Lymphatic	Angpt2
Fgd6	2.32116e-18	0.378817	0.424	0.049	4.20803e-14	Lymphatic	Fgd6
Dock5	2.4303e-18	0.273477	0.242	0.015	4.4059e-14	Lymphatic	Dock5
Nt5e	2.90642e-18	0.445838	0.424	0.05	5.26905e-14	Lymphatic	Nt5e
Armc10	3.88319e-18	0.461873	0.545	0.083	7.03984e-14	Lymphatic	Armc10
Plxdc21	4.41472e-18	0.608972	0.606	0.099	8.00344e-14	Lymphatic	Plxdc2
Cd302	1.25468e-17	0.282551	0.333	0.031	2.2746e-13	Lymphatic	Cd302
Trio	1.65327e-17	0.323258	0.364	0.038	2.99721e-13	Lymphatic	Trio
Enpep1	2.34644e-17	0.601837	0.515	0.077	4.25386e-13	Lymphatic	Enpep
Lmcd12	3.52905e-17	0.503328	0.576	0.095	6.39782e-13	Lymphatic	Lmcd1
Cgnl11	5.12641e-17	0.375837	0.515	0.075	9.29368e-13	Lymphatic	Cgnl1
Unc5b1	1.04563e-16	0.852169	0.879	0.245	1.89562e-12	Lymphatic	Unc5b
Nfat51	2.21458e-16	1.10829	0.939	0.376	4.01481e-12	Lymphatic	Nfat5
Map1b1	2.52212e-16	0.999981	0.788	0.22	4.57235e-12	Lymphatic	Map1b
Itm2a	2.7232e-16	0.57576	0.485	0.073	4.9369e-12	Lymphatic	Itm2a
Mospd2	3.29095e-16	0.693431	0.697	0.155	5.96616e-12	Lymphatic	Mospd2
Ctnnal1	3.89627e-16	0.687655	0.667	0.143	7.06355e-12	Lymphatic	Ctnnal1
Mgll1	4.37425e-16	0.820276	0.939	0.3	7.93007e-12	Lymphatic	Mgll
Frmd61	4.84731e-16	0.603218	0.697	0.149	8.78768e-12	Lymphatic	Frmd6
Rps6ka1	5.41546e-16	0.400104	0.455	0.065	9.81769e-12	Lymphatic	Rps6ka1
Capg	8.91761e-16	0.560939	0.394	0.051	1.61667e-11	Lymphatic	Capg
Mgat4b	9.44984e-16	0.370304	0.545	0.09	1.71316e-11	Lymphatic	Mgat4b
Sft2d2	1.0031e-15	0.493949	0.576	0.102	1.81851e-11	Lymphatic	Sft2d2
Vangl1	1.23497e-15	0.499737	0.636	0.128	2.23887e-11	Lymphatic	Vangl1
Fgf12	1.59437e-15	0.280252	0.303	0.03	2.89043e-11	Lymphatic	Fgf12
Gnas	1.64898e-15	0.312069	0.394	0.05	2.98944e-11	Lymphatic	Gnas
Pam2	2.75416e-15	0.869144	0.939	0.36	4.99301e-11	Lymphatic	Pam
Cuedc1	3.54169e-15	0.261117	0.333	0.037	6.42073e-11	Lymphatic	Cuedc1
Fos1	4.74049e-15	1.32684	0.848	0.264	8.59403e-11	Lymphatic	Fos
Sidt2	6.539e-15	0.413927	0.515	0.087	1.18546e-10	Lymphatic	Sidt2
Rassf92	6.69848e-15	0.632489	0.697	0.158	1.21437e-10	Lymphatic	Rassf9
Dirc2	7.07136e-15	0.281617	0.455	0.068	1.28197e-10	Lymphatic	Dirc2
Mustn1	7.40281e-15	0.849536	0.727	0.194	1.34206e-10	Lymphatic	Mustn1
Dse	8.51315e-15	0.314376	0.485	0.077	1.54335e-10	Lymphatic	Dse
Eva1a	1.01314e-14	0.28332	0.394	0.054	1.83673e-10	Lymphatic	Eva1a
Mylip1	1.14369e-14	0.473781	0.636	0.132	2.07339e-10	Lymphatic	Mylip
Abhd17b	1.15464e-14	0.853029	0.909	0.338	2.09324e-10	Lymphatic	Abhd17b
Fcgrt2	1.92426e-14	0.912037	0.788	0.224	3.4885e-10	Lymphatic	Fcgrt
Ggh	1.93252e-14	0.263716	0.364	0.046	3.50347e-10	Lymphatic	Ggh
Lama41	2.03785e-14	0.641177	0.758	0.199	3.69442e-10	Lymphatic	Lama4
Aplp2	2.32657e-14	0.980018	0.97	0.688	4.21783e-10	Lymphatic	Aplp2
Pald1	2.48174e-14	0.530773	0.576	0.114	4.49915e-10	Lymphatic	Pald1
Trim35	2.54234e-14	0.509698	0.697	0.164	4.60901e-10	Lymphatic	Trim35
Utrn	2.63225e-14	1.0911	0.909	0.446	4.77201e-10	Lymphatic	Utrn
RGD13091041	2.7329e-14	0.565839	0.667	0.152	4.95448e-10	Lymphatic	RGD1309104
LOC100912034	3.58319e-14	0.460848	0.545	0.104	6.49596e-10	Lymphatic	LOC100912034
Ltbp41	3.60446e-14	0.641592	0.818	0.221	6.53452e-10	Lymphatic	Ltbp4
Tgfbr3	4.68455e-14	0.708492	0.667	0.155	8.49262e-10	Lymphatic	Tgfbr3
Stxbp11	8.31552e-14	0.329302	0.515	0.092	1.50752e-09	Lymphatic	Stxbp1
Gramd4	1.10358e-13	0.297865	0.242	0.022	2.00068e-09	Lymphatic	Gramd4
Hacd3	1.30778e-13	0.267667	0.455	0.073	2.37087e-09	Lymphatic	Hacd3
Gchfr1	1.6431e-13	0.572358	0.667	0.158	2.97878e-09	Lymphatic	Gchfr
Cald11	1.71611e-13	0.959796	0.97	0.59	3.11113e-09	Lymphatic	Cald1
Myc	1.73588e-13	0.272019	0.364	0.049	3.14698e-09	Lymphatic	Myc
Trps1	1.9867e-13	0.380957	0.455	0.077	3.60169e-09	Lymphatic	Trps1
Wdr44	2.27565e-13	0.358448	0.485	0.084	4.12552e-09	Lymphatic	Wdr44
Nf1x	2.58437e-13	0.250805	0.303	0.036	4.68521e-09	Lymphatic	Nf1x
Gypc1	2.79868e-13	0.525774	0.758	0.204	5.07372e-09	Lymphatic	Gypc
LOC102549506	3.128e-13	0.354221	0.485	0.086	5.67075e-09	Lymphatic	LOC102549506
Fam102a	3.63745e-13	0.294219	0.394	0.059	6.59434e-09	Lymphatic	Fam102a
Plcd1	4.40872e-13	0.397816	0.333	0.044	7.99258e-09	Lymphatic	Plcd1
Cyr61	5.58581e-13	0.48517	0.636	0.14	1.01265e-08	Lymphatic	Cyr61
Abhd4	6.21263e-13	0.437797	0.667	0.157	1.12629e-08	Lymphatic	Abhd4
Rab29	7.08798e-13	0.337903	0.485	0.09	1.28498e-08	Lymphatic	Rab29
Ppp2r5a	7.2318e-13	0.594436	0.727	0.195	1.31105e-08	Lymphatic	Ppp2r5a
Lgals31	9.89551e-13	0.432148	0.485	0.09	1.79396e-08	Lymphatic	Lgals3
Golgb1	1.05899e-12	0.69517	0.879	0.303	1.91985e-08	Lymphatic	Golgb1
Lrrc32	1.1451e-12	0.474481	0.485	0.091	2.07595e-08	Lymphatic	Lrrc32
Tbc1d4	1.38859e-12	0.286693	0.364	0.054	2.51738e-08	Lymphatic	Tbc1d4
Ulk1	1.50787e-12	0.290394	0.424	0.072	2.73362e-08	Lymphatic	Ulk1
Filip11	2.47322e-12	0.535195	0.606	0.144	4.4837e-08	Lymphatic	Filip1
Ccng1	2.78758e-12	0.630554	0.667	0.179	5.05361e-08	Lymphatic	Ccng1
Cpq	2.82499e-12	0.261748	0.424	0.071	5.12143e-08	Lymphatic	Cpq
Sirpa1	3.0636e-12	0.301671	0.545	0.111	5.554e-08	Lymphatic	Sirpa
Dstn	3.11771e-12	0.700215	1	0.827	5.65211e-08	Lymphatic	Dstn
Tspan18	4.56368e-12	0.923534	0.939	0.452	8.2735e-08	Lymphatic	Tspan18
Dnajb4	4.60542e-12	0.294304	0.515	0.104	8.34916e-08	Lymphatic	Dnajb4
Fam43a	5.11642e-12	0.623227	0.758	0.23	9.27555e-08	Lymphatic	Fam43a
2021-09-06	5.11828e-12	0.416732	0.576	0.132	9.27893e-08	Lymphatic	2021-09-06
Snx2	6.31975e-12	0.762239	0.879	0.39	1.14571e-07	Lymphatic	Snx2
Dap1	7.51732e-12	0.373871	0.667	0.163	1.36282e-07	Lymphatic	Dap
Pip5k1c	8.66874e-12	0.529715	0.727	0.209	1.57156e-07	Lymphatic	Pip5k1c
Pdlim1	9.89132e-12	0.59285	0.636	0.17	1.7932e-07	Lymphatic	Pdlim1
Ophn1	1.00625e-11	0.368565	0.545	0.116	1.82424e-07	Lymphatic	Ophn1
Eml41	1.05389e-11	0.710641	0.848	0.317	1.91059e-07	Lymphatic	Eml4
Tgif1	1.07826e-11	0.357914	0.576	0.13	1.95478e-07	Lymphatic	Tgif1
Tbxa2r1	1.1231e-11	0.357554	0.515	0.104	2.03608e-07	Lymphatic	Tbxa2r
Baz2a	1.13799e-11	0.321437	0.333	0.049	2.06306e-07	Lymphatic	Baz2a
Slc38a5	1.3513e-11	0.361808	0.303	0.041	2.44978e-07	Lymphatic	Slc38a5
Lysmd2	1.66255e-11	0.337524	0.515	0.105	3.01403e-07	Lymphatic	Lysmd2
Rgs19	1.71732e-11	0.356537	0.606	0.145	3.11332e-07	Lymphatic	Rgs19
Stambpl1	1.86376e-11	0.285479	0.273	0.034	3.37881e-07	Lymphatic	Stambpl1
Lbh	1.96408e-11	0.27981	0.485	0.094	3.56068e-07	Lymphatic	Lbh
Mgat1	2.04103e-11	0.489516	0.788	0.227	3.70019e-07	Lymphatic	Mgat1
Asap1	2.16056e-11	0.34486	0.606	0.144	3.91689e-07	Lymphatic	Asap1
AABR07001382.11	2.21774e-11	0.696209	0.848	0.304	4.02054e-07	Lymphatic	AABR07001382.1
Elk4	2.30885e-11	0.65661	0.848	0.312	4.18572e-07	Lymphatic	Elk4
Ppp1r14b	2.74343e-11	0.531927	0.697	0.203	4.97356e-07	Lymphatic	Ppp1r14b
Strn	2.90491e-11	0.278262	0.394	0.067	5.26631e-07	Lymphatic	Strn
Trmt10b	2.91485e-11	0.269408	0.545	0.117	5.28433e-07	Lymphatic	Trmt10b
Mpdz	3.03592e-11	0.344879	0.636	0.155	5.50381e-07	Lymphatic	Mpdz
Palm1	3.03977e-11	0.281705	0.515	0.108	5.5108e-07	Lymphatic	Palm
Npl	3.24846e-11	0.256823	0.394	0.067	5.88913e-07	Lymphatic	Npl
Sbf2	3.57028e-11	0.330829	0.545	0.12	6.47255e-07	Lymphatic	Sbf2
Kcne31	4.02361e-11	0.349503	0.515	0.107	7.2944e-07	Lymphatic	Kcne3
Casc4	4.72542e-11	0.404662	0.636	0.162	8.56671e-07	Lymphatic	Casc4
Rps281	5.14578e-11	0.643116	1	0.93	9.32878e-07	Lymphatic	Rps28
[truncated: 298 more rows]
